# Supplementary material
Source: publisher figshare collection journal article supplement (https://frontiersin.figshare.com/ndownloader/files/21103137)
Supplement: Supplementary file 1 [file 21103137]

Appendix 3 = Script used for Total-Evidence Tip-Dating analysis

#NEXUS

begin data;

dimensions ntax=66 nchar=5694;

format datatype=mixed(DNA:1-5490, standard:5491-5694) missing=? gap=- interleave=yes;

MATRIX

Acrophoca_longirostris ??????????????????????????????????????????????????????????????????????????????????????????????????????????????????????????????????????????????????????????????????????????????????????????????????????????????????????????????????????????????????????????????????????????????????????????????????????????????????????????????????????????????????????????????????????????????????????????????????????????????????????????????????????????????????????????????????????????????????????????????????????????????????????????????????????????????????????????????????????????????????????????????????????????????????????????????????????????????????????????????????????????????????????????????????????????????????????????????????????????????????????????????????????????????????????????????????????????????????????????????????????????????????????????????????????????????????????????????????????????????????????????????????????????????????????????????????????????????????????????????????????????????????????????????????????????????????????????????????????????????????????????????????????????????????????????????????????????????????????????????????????????????????????????????????????????????????????????????????????????????????????????????????????????????????????????????????????????????????????????????????????????????????????????????????????????????????????????????????????????????????????????????????????????????????????????????????????????????????????????????????????????????????????????????????????????????????????????????????????????????????????????????????????????????????????????????????????????????????????????????????????????????????????????????????????????????????????????????????????????????????????????????????????????????????????????????????????????????????????????????????????????????????????????????????????????????????????????????????????????????????????????????????????????????????????????????????????????????????????????????????????????????????????????????????????????????????????????????????????????????????????????????????????????????????????????????????????????????????????????????????????????????????????????????????????????????????????????????????????????????????????????????????????????????????????????????????????????????????????????????????????????????????????????????????????????????????????????????????????????????????????????????????????????????????????????????????????????????????????????????????????????????????????????????????????????????????????????????????????????????????????????????????????????????????????????????????????????????????????????????????????????????????????????????????????????????????????????????????????????????????????????????????????????????????????????????????????????????????????????????????????????????????????????????????????????????????????????????????????????????????????????????????????????????????????????????????????????????????????????????????????????????????????????????????????????????????????????????????????????????????????????????????????????????????????????????????????????????????????????????????????????????????????????????????????????????????????????????????????????????????????????????????????????????????????????????????????????????????????????????????????????????????????????????????????????????????????????????????????????????????????????????????????????????????????????????????????????????????????????????????????????????????????????????????????????????????????????????????????????????????????????????????????????????????????????????????????????????????????????????????????????????????????????????????????????????????????????????????????????????????????????????????????????????????????????????????????????????????????????????????????????????????????????????????????????????????????????????????????????????????????????????????????????????????????????????????????????????????????????????????????????????????????????????????????????????????????????????????????????????????????????????????????????????????????????????????????????????????????????????????????????????????????????????????????????????????????????????????????????????????????????????????????????????????????????????????????????????????????????????????????????????????????????????????????????????????????????????????????????????????????????????????????????????????????????????????????????????????????????????????????????????????????????????????????????????????????????????????????????????????????????????????????????????????????????????????????????????????????????????????????????????????????????????????????????????????????????????????????????????????????????????????????????????????????????????????????????????????????????????????????????????????????????????????????????????????????????????????????????????????????????????????????????????????????????????????????????????????????????????????????????????????????????????????????????????????????????????????????????????????????????????????????????????????????????????????????????????????????????????????????????????????????????????????????????????????????????????????????????????????????????????????????????????????????????????????????????????????????????????????????????????????????????????????????????????????????????????????????????????????????????????????????????????????????????????????????????????????????????????????????????????????????????????????????????????????????????????????????????????????????????????????????????????????????????????????????????????????????????????????????????????????????????????????????????????????0021120020100320?0012?100110313?12100???4050310002012010020?21?2?210?1?1?2???110?0?10?00?0?015?2??????????12??????0001???????2?????20001?1111100?101111121022?111101?12111112121011101002111100011101???????

Ailurus_fulgens TGATGCCCCCCACGGAAGGCCCCGTCAGCTCCACCACCCCGTATGTGGAGGACACCCCCGAGCCGCCCCTCCATGACTTCTACTGCAGCAGGCTTCTAGACCTGGTTTTCCTGCTAGATGGCTCTTCCAAGCTGTCTGAGGATGAGTTTGGAGTGCTGAAGGCCTTCGTGGTGGGCATGATGGAGCATCTGCACATCTCCCAGAAGCGGATCCGCGTGGCGGTGGTGGAGTACCACGACGGATCCCACGCCTACATTGAGCTCCAGGACCGGAAGCGACCCTCGGAGTTGCGGCGCATTGCCAGCCAAGTGAAGTACGTGGGCAGCGAGGTGGCTTCCACCAGCGAGGTCCTGAAGTACACACTGTTCCAGATCTTCAGCAGGATCGACCGCCCCGAAGCGTCCCGCGTTGCCCTGCTCCTCATGGCCAGMCAGGAGACCCCGAGGCTGGCCCGCAATTTGATCCGCTATGTGCAGGGCCTGAAGAACAAGAAGGTCACCGTGATCCCCGTGGGCATCGGGCCCCATGCCAACCTCAGGCAGATCCGCAACATTGAGAAGCAGGCCCCCGAGAACAAGGCCTTCGTGCTCAGCGGTGTGGACGAGCTGGAGCAGCGAAGGGACGAGATTATCAACTACCTGTGTGACCTTGCTCCCGAAGCACCTGGCCCTACTCGGCAGCCCCCTGTGCTGGCGGTCACCGTGGGTCCAGAGCTCTCAGGGGTCCCGTCATCGGGACCCAAAAGGAACTCCATGGTTCTCGATGTGGTGTTCGTCCTGGAAGGCTCGGACAAAATTGGCGAGGCCAACTTTAACAAGAGCAAGGAGTTCATGGAGGAGGTGATTCAGCGGATGGACGTGGGCCAGGACGGCATCCACGTCACAGTGCTGCAGTACTCCTACGCCGTGACTGTGGAGTACACCTTCAGCGAGGCCCAGTCCAAGGGGGAGGTCCTGCAGCACGTGCGGGAGATCCGATTCCGGGGCGGCAACAGGACCAACACCGGGCTGGCCCTGCAGTACCTGTCTGAGCACAGCTTCTCTGTCAGCCAGGGGGACCGGGAGCAGGTCCCTAACCTGGTCTACATGGTCACAGGAAACCCCGCCTCTGATGAGATCAAGCGGATGCCTGGCGACATCCAGGTGGTGCCCATCGGAGTGGGCCCTCACGCCGATGTGCAGGAGCTGGAGATAAAGACAGAATGAATGTAGAAAAGGCTGAATTCTGTAATAAAAGCAAACAGCCTGGCTTAGCAAGGAGCCAACAGAACAGATGGGCTGAAAGTAAGGAAACATGTAATGATAGGCAGACTCCCAGCAGAGAGAGAAAGGTACTTCTGACTGCCGATCCCCTGTGTGGGAAAAAAGAACTGAAGACGCAGAAACCTCCATGCTCTGACAGTCCTAGAGATTCCCAAGATGTTCCTTGGATAACACTGAATAGTAGCATACAGAAAGTTAATGAGTGGTTTTCCAGAAGTGATGAAATGTTAACTTCC---GATGACTCACATGATGGGGGATCTGAATCGAATACTGAAGTAGCTGGTGCAATAGAAGTTCCAAATGAAGTGGATGCATATTCTGGTTCTTCTGAGAAAATAGACTTAATGGCCAGTGAGCCTCAGGATTCTTTGATATGTGAAAGCGAAAGAGTCCACACCAAGCCAGTAGAGAGTAATATCGAAGATAAAATATTTGGGAAAACCTACCGGAGGAAGGCAAACCTCCTTAATGTGAGCCACATGAATGAAGATCTAATTATAGGAACGTGTGCTGTAGAACCTCAGACAATGCAAGCCCATCCCCTCACGAATAAAGCAAAGCATAAAAGGAGAACTACATCAGGCCTTCATCCTGAGGATTTTATCAAGAAAGTAGATTTGGCCGTTGTCCCAGAGACTCCTGAAAAGCTAGTTGAGGGAACCGACCAAATCAAACGAAGTGGTCATGTGATGAATGTTACAAGTAATGGTCCTGATAATGAAACAAAAGGTGATTATGTTCAGACCGAGAAAAATGCTAACCCAACAGAATCATTGGAAAAAGAATCTGCTTTTAGAAGCAAAGCTGAACCGATAAGCAGTAGTATAAGCAATATGGAACTGGAATTAAATAGCTCCAGTTTGAAAGCCCCTAAGAAGAACAGGCTGAGGAGGAAGTCCTCCACCAGGCACGCTTATGCGCTTGAATTCGTAGTCAGTAGAAATCCAAGCCCGCCTGATCATAGGGAACTACAGAACCATCAGAATTTCTCTGCTGGAAACAATAAGAACCGCATTGAGGCCCACATAGGAATAGATGGAGAAGCCAACCTGGATTTCCTCAACATTCCTTTGACAATTCCTGAAATGACTCTACCTTATACAACACTCACAACTCCCCAGGTGAAAGGTTTCTCCCTGTGGGAAAAAACAGGCTTGAAGGATTTCTTGAAGACAACAAAGCAATCATTTGATTTAAGTGTAAATGCTCAGTATAAGAAAAACAAAGACAAGCTCATCATCCCAGTTCCTTTTTATGCAAAAGATTTCCAGGTATTCAGTATCCCAAATAACATTTTCATTCCAGCCATGGGCAATATTACCTATGACTTCTCCTTTAAGTCAGGCGTCATCACACTGAATACCAATGTTGGACTGTATAACCAATCAAATATTGTCGCTCATTTCCTAACTTCCTCTTCTTCTGTCACTGATGCACTGCAGTACAAATTAGAGGGCACCTCAAGTTTGACGAGGAAAAGAGGCTTGAAGCTAGCCACAGCTTTGTCTCTGAGTAATAAATTCGTGGAAGGAAGTCATGACAGTACTATTAGTTTGACCAAGAAAAACATGGAGGCGTCAGTGACAACATCTGCAAAAGTCCAAATTCCTATTTTAAGAATGAATTTCAAGCAAGAACTTAATGGAAATACCAAGTCAAAGCCTACTGTCTCTTCATCCATTGAATTAATGTATGATCTCAATTCCCCTGAACTGTACTCTACTGCTACAGGGACAGTAAAGCACAAACTCAGCCTAGAGAGCCTCACCTCTTACTTTTCCATTGAGTCATCTACCAAAGGGGATATCAAGGGCTCAGTGCTTTCAAGGGAATATTCAGGAACTATTACCAGTGAGGCCAGCACTTACTTGAATTCCAAGAGTACTCGGTCTTCAGTGAAGCTGCAAGGGGCTTCCAAAATTGATGATATCTGGAACCCATGAGAGCCCAAGACCTTGATGACTACCTGAATGGCCCCTTCACCGTTGTGGTGAAGGAGTCTTGTGATGGAATGGGAGACGTGAGCGAGAAGCATGGGAGCGGGCCAGCAGTTCCAGAAAAGGCAGTTCGGTTTTCATTCACGGTCATGAAAATTACTATAGCACATGGCTCAGAAAACGTGAAGGTGTTTGAAGAAGTCAAACCCAACTCTGAACTGTGTTGTAAGCCCCTGTGTCTCATGCTGGCGGATGAGTCTGACCACGAGACCCTGACGGCCATCCTGAGCCCTCTCATTGCTGAGAGGGAGGCCATGAAGAACAGTCAATTAATGCTTGAGATGGGAGGCATCCTTCGGAGTTTCAAGTTCATCTTCAGGGGCACCGGATATGATGAGAAACTCGTCCGGGAAGTCGAAGGCCTCGAGGCTTCTGGCTCAGTCTACATTTGTACCCTTTGTGATGCCACCCGCCTGGAAGCATCTCAAAATCTCGTCTTCCATTCCATCACCAGAAGCCACTCTGAGAACCTGGAGCGCTATGAGGTCTGGCGTTCTAACCCGTACCACGAGTCCGTGGAAGAGCTGCGGGATCGGGTGAAAGGGGTCTCATCGAAACCTTTCATCGAGACGGTCCCTTCTATAGATGCACTCCACTGTGACATTGGCAATGCAGCTGAGTTCTACAAGATCTTCCAGCTAGAGATAGGGGAGGTGTATAAGAATCCCAATGCCTCCAAAGAGGAAAGGAAAAGATGGCAGGCTACGCTGGACAAGCATCTCCGGAAGAAGATGAACCTGAAACCGATCATGAGGATGAATGGCAATTTTGCCAGGAAGCTCATGACCAAAGAGACAGTTGAAGCAGTTTGTGAATTAATTCCTTCTGAGGAGAGGCATGAAGCTCTGAGGGAGCTGATGGACCTTTATCTTAAGATGAAGCCTGTGTGGAGATCATCGTGTCCTGCCAAAGAGTGCCCAGAATCTCTCTGCCAGTATAGCTTCAATTCACAGCGTTTTGCTGAGCTCCTCTCTACCAAGTTCAAGTATAGATATGAGGGCAAAATCACTAATTATTTTCACAAAACCCTGGCACA????GCCCATGTGCTGACCACCGGGGTGCAGAGCTCCTTGAACGACCCTCGCCTGGTCATCTCCTATGAGCCCAGCACCCTCGAGGCTCCCCGGCAAGCCCCAGCCCTCACCAACCTCACACAAGAGGAACTGCTTGCCCGCTTGCAGAAGGGCATCCGCCACGAGGTTCTGGAGGGCAATGTGGGCTACCTGCGTGTGGACGACATCCCAGGCCAGGAGGTGGTGAGCAAGCTGGGGGGCTTCCTGGTGGCCAGCGTCTGGAGGAAGCTCATGGGCACCTCTGCCTTGGTGCTGGACCTCCGGCACTGCACTGGGGGTCACATTTCCGGGATCCCCTACGTCATCTCCTACCTGCACCCAGGGAACACGGTCCTGCATGTGGATACCATCTACGACCGCCCCTCCAATACGACCACTGAGATCTGGACCTTGCCCCAGGTCCTGGGAGAAAGGTACAGCGCTGACAAGGATGTGGTGGTCCTCACCAGTGGACACACGGGGGGCGTGGCTGAGGACATCACTTACATCCTCAAACAGATGCGCAGGGCGATCGTGGTGGGCGAGCGGACTGTGGGGGGCGCCCTTGACCTTCAGAAGCTGAGGATAGGCCAGTCCGACTTCTTCCTCACTGTGCCCGTGTCCAGGTCCCTAGGGCCCCTGGGAGGGGGCAGCCAGACCTGGGAGGGCAGCGGGGTGCTGCCCTGTGTGGGGACACCGGCCGAGCAGGCCCTCGAGAAAGCCCTGGCCATCCTCACCTTGCGCCGGGCCCTGCCTGGAGTTGTGCGGCGCCTGCAGGAGGCGCTGCAGGCCTACTACACGCTGGTGGACCGCGTGCCCACCCTGCTGCACCACCTGGCCAACATGGACTTCTCTGCTGTGGTCTCCAAGGAGGACCTGGTCGCGAAGCTCAACGCGGGTCTGCAGACTGCCTCCGAGGACCCTAGGCTCCTGGTGAGGGCCGTCAGGCCCAAAGAAACCTCTTCTGGGCCCGAGGTTGGAGACGACGACCCTCTGGTGGTGGTCCCCACGGTGCCCGACGATGAGGCTGCCCGGCGGGCCCTGGTGGGCACTATGTTCCAGGTGTCCGTGCTGCCAGGCAACGTGGGCTACCTCCGCTTTGACAGCTTTGCCGACGCCTCGGTGCTGGAGGTGCTGAGCCCCTACATCATGCGTCAGGTGTGGGGGCCCCTG0000110010111120000301201230200000000???00310130100010?00101100000010?0000?10020100000111111030?10111000000001011000(0 1)04200022321100210020000011100000010010000000000?000000000000000000001011100010000000???

Allocyon_loganensis ??????????????????????????????????????????????????????????????????????????????????????????????????????????????????????????????????????????????????????????????????????????????????????????????????????????????????????????????????????????????????????????????????????????????????????????????????????????????????????????????????????????????????????????????????????????????????????????????????????????????????????????????????????????????????????????????????????????????????????????????????????????????????????????????????????????????????????????????????????????????????????????????????????????????????????????????????????????????????????????????????????????????????????????????????????????????????????????????????????????????????????????????????????????????????????????????????????????????????????????????????????????????????????????????????????????????????????????????????????????????????????????????????????????????????????????????????????????????????????????????????????????????????????????????????????????????????????????????????????????????????????????????????????????????????????????????????????????????????????????????????????????????????????????????????????????????????????????????????????????????????????????????????????????????????????????????????????????????????????????????????????????????????????????????????????????????????????????????????????????????????????????????????????????????????????????????????????????????????????????????????????????????????????????????????????????????????????????????????????????????????????????????????????????????????????????????????????????????????????????????????????????????????????????????????????????????????????????????????????????????????????????????????????????????????????????????????????????????????????????????????????????????????????????????????????????????????????????????????????????????????????????????????????????????????????????????????????????????????????????????????????????????????????????????????????????????????????????????????????????????????????????????????????????????????????????????????????????????????????????????????????????????????????????????????????????????????????????????????????????????????????????????????????????????????????????????????????????????????????????????????????????????????????????????????????????????????????????????????????????????????????????????????????????????????????????????????????????????????????????????????????????????????????????????????????????????????????????????????????????????????????????????????????????????????????????????????????????????????????????????????????????????????????????????????????????????????????????????????????????????????????????????????????????????????????????????????????????????????????????????????????????????????????????????????????????????????????????????????????????????????????????????????????????????????????????????????????????????????????????????????????????????????????????????????????????????????????????????????????????????????????????????????????????????????????????????????????????????????????????????????????????????????????????????????????????????????????????????????????????????????????????????????????????????????????????????????????????????????????????????????????????????????????????????????????????????????????????????????????????????????????????????????????????????????????????????????????????????????????????????????????????????????????????????????????????????????????????????????????????????????????????????????????????????????????????????????????????????????????????????????????????????????????????????????????????????????????????????????????????????????????????????????????????????????????????????????????????????????????????????????????????????????????????????????????????????????????????????????????????????????????????????????????????????????????????????????????????????????????????????????????????????????????????????????????????????????????????????????????????????????????????????????????????????????????????????????????????????????????????????????????????????????????????????????????????????????????????????????????????????????????????????????????????????????????????????????????????????????????????????????????????????????????????????????????????????????????????????????????????????????????????????????????????????????????????????????????????????????????????????????????????????????????????????????????????????????????????????????????????????????????????????????????????????????????????????????????????????????????????????????????????????????????????????????????????????????????????????????????????????????????????????????????????????????????????????????????????????????????????????????????????????????????????????????????????????????????????????????????????????????????????????????????????????????????????????????????????????????????????????????????????????????????????????????????????????????????????????????????????????????????????????????????????????????????????????????????????????????????????????????????????????????????????????????????????????????????????????????????????????????????????????????????????????????????????????????????????????????????????????????????????????????????????????????????????????????????????????????????????????????????????????????????????????????????????????????????????????????????????????????????????????????????????????????????????????????????????????????????????????????????????????????????????????????????????????????????????????????????????????????????????????????????????????????????????????????001?111010?1??2?0???0?1???00?0?000000???1010?2302?000????10110?????0?????????010??000??0??00030?01???1?2000001101?0?00??00?200?????0????????????????????????????????????????????????????????????????????????

Allodesmus_sp ??????????????????????????????????????????????????????????????????????????????????????????????????????????????????????????????????????????????????????????????????????????????????????????????????????????????????????????????????????????????????????????????????????????????????????????????????????????????????????????????????????????????????????????????????????????????????????????????????????????????????????????????????????????????????????????????????????????????????????????????????????????????????????????????????????????????????????????????????????????????????????????????????????????????????????????????????????????????????????????????????????????????????????????????????????????????????????????????????????????????????????????????????????????????????????????????????????????????????????????????????????????????????????????????????????????????????????????????????????????????????????????????????????????????????????????????????????????????????????????????????????????????????????????????????????????????????????????????????????????????????????????????????????????????????????????????????????????????????????????????????????????????????????????????????????????????????????????????????????????????????????????????????????????????????????????????????????????????????????????????????????????????????????????????????????????????????????????????????????????????????????????????????????????????????????????????????????????????????????????????????????????????????????????????????????????????????????????????????????????????????????????????????????????????????????????????????????????????????????????????????????????????????????????????????????????????????????????????????????????????????????????????????????????????????????????????????????????????????????????????????????????????????????????????????????????????????????????????????????????????????????????????????????????????????????????????????????????????????????????????????????????????????????????????????????????????????????????????????????????????????????????????????????????????????????????????????????????????????????????????????????????????????????????????????????????????????????????????????????????????????????????????????????????????????????????????????????????????????????????????????????????????????????????????????????????????????????????????????????????????????????????????????????????????????????????????????????????????????????????????????????????????????????????????????????????????????????????????????????????????????????????????????????????????????????????????????????????????????????????????????????????????????????????????????????????????????????????????????????????????????????????????????????????????????????????????????????????????????????????????????????????????????????????????????????????????????????????????????????????????????????????????????????????????????????????????????????????????????????????????????????????????????????????????????????????????????????????????????????????????????????????????????????????????????????????????????????????????????????????????????????????????????????????????????????????????????????????????????????????????????????????????????????????????????????????????????????????????????????????????????????????????????????????????????????????????????????????????????????????????????????????????????????????????????????????????????????????????????????????????????????????????????????????????????????????????????????????????????????????????????????????????????????????????????????????????????????????????????????????????????????????????????????????????????????????????????????????????????????????????????????????????????????????????????????????????????????????????????????????????????????????????????????????????????????????????????????????????????????????????????????????????????????????????????????????????????????????????????????????????????????????????????????????????????????????????????????????????????????????????????????????????????????????????????????????????????????????????????????????????????????????????????????????????????????????????????????????????????????????????????????????????????????????????????????????????????????????????????????????????????????????????????????????????????????????????????????????????????????????????????????????????????????????????????????????????????????????????????????????????????????????????????????????????????????????????????????????????????????????????????????????????????????????????????????????????????????????????????????????????????????????????????????????????????????????????????????????????????????????????????????????????????????????????????????????????????????????????????????????????????????????????????????????????????????????????????????????????????????????????????????????????????????????????????????????????????????????????????????????????????????????????????????????????????????????????????????????????????????????????????????????????????????????????????????????????????????????????????????????????????????????????????????????????????????????????????????????????????????????????????????????????????????????????????????????????????????????????????????????????????????????????????????????????????????????????????????????????????????????????????????????????????????????????????????????????????????????????????????????????????????????????????????????????????????????????????????????????????????????????????????????????????????????????????????????????????????????????????????????????????????????????????????????????????????????????????00011211?2100?3000210200010(0 1)301011100???2120?230?2101?1?110?11?0?110010?1?12?11120????0?2??11??33???????0?210???1?01?????????????????0031110?0?01021111121021111110?1111?1011?11???11001101111001??1?1??01??

Amphicticeps_shackelfordi ??????????????????????????????????????????????????????????????????????????????????????????????????????????????????????????????????????????????????????????????????????????????????????????????????????????????????????????????????????????????????????????????????????????????????????????????????????????????????????????????????????????????????????????????????????????????????????????????????????????????????????????????????????????????????????????????????????????????????????????????????????????????????????????????????????????????????????????????????????????????????????????????????????????????????????????????????????????????????????????????????????????????????????????????????????????????????????????????????????????????????????????????????????????????????????????????????????????????????????????????????????????????????????????????????????????????????????????????????????????????????????????????????????????????????????????????????????????????????????????????????????????????????????????????????????????????????????????????????????????????????????????????????????????????????????????????????????????????????????????????????????????????????????????????????????????????????????????????????????????????????????????????????????????????????????????????????????????????????????????????????????????????????????????????????????????????????????????????????????????????????????????????????????????????????????????????????????????????????????????????????????????????????????????????????????????????????????????????????????????????????????????????????????????????????????????????????????????????????????????????????????????????????????????????????????????????????????????????????????????????????????????????????????????????????????????????????????????????????????????????????????????????????????????????????????????????????????????????????????????????????????????????????????????????????????????????????????????????????????????????????????????????????????????????????????????????????????????????????????????????????????????????????????????????????????????????????????????????????????????????????????????????????????????????????????????????????????????????????????????????????????????????????????????????????????????????????????????????????????????????????????????????????????????????????????????????????????????????????????????????????????????????????????????????????????????????????????????????????????????????????????????????????????????????????????????????????????????????????????????????????????????????????????????????????????????????????????????????????????????????????????????????????????????????????????????????????????????????????????????????????????????????????????????????????????????????????????????????????????????????????????????????????????????????????????????????????????????????????????????????????????????????????????????????????????????????????????????????????????????????????????????????????????????????????????????????????????????????????????????????????????????????????????????????????????????????????????????????????????????????????????????????????????????????????????????????????????????????????????????????????????????????????????????????????????????????????????????????????????????????????????????????????????????????????????????????????????????????????????????????????????????????????????????????????????????????????????????????????????????????????????????????????????????????????????????????????????????????????????????????????????????????????????????????????????????????????????????????????????????????????????????????????????????????????????????????????????????????????????????????????????????????????????????????????????????????????????????????????????????????????????????????????????????????????????????????????????????????????????????????????????????????????????????????????????????????????????????????????????????????????????????????????????????????????????????????????????????????????????????????????????????????????????????????????????????????????????????????????????????????????????????????????????????????????????????????????????????????????????????????????????????????????????????????????????????????????????????????????????????????????????????????????????????????????????????????????????????????????????????????????????????????????????????????????????????????????????????????????????????????????????????????????????????????????????????????????????????????????????????????????????????????????????????????????????????????????????????????????????????????????????????????????????????????????????????????????????????????????????????????????????????????????????????????????????????????????????????????????????????????????????????????????????????????????????????????????????????????????????????????????????????????????????????????????????????????????????????????????????????????????????????????????????????????????????????????????????????????????????????????????????????????????????????????????????????????????????????????????????????????????????????????????????????????????????????????????????????????????????????????????????????????????????????????????????????????????????????????????????????????????????????????????????????????????????????????????????????????????????????????????????????????????????????????????????????????????????????????????????????????????????????????????????????????????????????????????????????????????????????????????????????????????????????????????????????????????????????????????????????????????????????????????????????????????????????????????001??110??01????0001011???0000000000????2011?1301?00?????????0????000000???????0?????00000?0000000(0 2)00101000111101?000002000001??0?3(0 2)????????????????????????????????????????????????????????????????????????

Amphictis_ambiguus ??????????????????????????????????????????????????????????????????????????????????????????????????????????????????????????????????????????????????????????????????????????????????????????????????????????????????????????????????????????????????????????????????????????????????????????????????????????????????????????????????????????????????????????????????????????????????????????????????????????????????????????????????????????????????????????????????????????????????????????????????????????????????????????????????????????????????????????????????????????????????????????????????????????????????????????????????????????????????????????????????????????????????????????????????????????????????????????????????????????????????????????????????????????????????????????????????????????????????????????????????????????????????????????????????????????????????????????????????????????????????????????????????????????????????????????????????????????????????????????????????????????????????????????????????????????????????????????????????????????????????????????????????????????????????????????????????????????????????????????????????????????????????????????????????????????????????????????????????????????????????????????????????????????????????????????????????????????????????????????????????????????????????????????????????????????????????????????????????????????????????????????????????????????????????????????????????????????????????????????????????????????????????????????????????????????????????????????????????????????????????????????????????????????????????????????????????????????????????????????????????????????????????????????????????????????????????????????????????????????????????????????????????????????????????????????????????????????????????????????????????????????????????????????????????????????????????????????????????????????????????????????????????????????????????????????????????????????????????????????????????????????????????????????????????????????????????????????????????????????????????????????????????????????????????????????????????????????????????????????????????????????????????????????????????????????????????????????????????????????????????????????????????????????????????????????????????????????????????????????????????????????????????????????????????????????????????????????????????????????????????????????????????????????????????????????????????????????????????????????????????????????????????????????????????????????????????????????????????????????????????????????????????????????????????????????????????????????????????????????????????????????????????????????????????????????????????????????????????????????????????????????????????????????????????????????????????????????????????????????????????????????????????????????????????????????????????????????????????????????????????????????????????????????????????????????????????????????????????????????????????????????????????????????????????????????????????????????????????????????????????????????????????????????????????????????????????????????????????????????????????????????????????????????????????????????????????????????????????????????????????????????????????????????????????????????????????????????????????????????????????????????????????????????????????????????????????????????????????????????????????????????????????????????????????????????????????????????????????????????????????????????????????????????????????????????????????????????????????????????????????????????????????????????????????????????????????????????????????????????????????????????????????????????????????????????????????????????????????????????????????????????????????????????????????????????????????????????????????????????????????????????????????????????????????????????????????????????????????????????????????????????????????????????????????????????????????????????????????????????????????????????????????????????????????????????????????????????????????????????????????????????????????????????????????????????????????????????????????????????????????????????????????????????????????????????????????????????????????????????????????????????????????????????????????????????????????????????????????????????????????????????????????????????????????????????????????????????????????????????????????????????????????????????????????????????????????????????????????????????????????????????????????????????????????????????????????????????????????????????????????????????????????????????????????????????????????????????????????????????????????????????????????????????????????????????????????????????????????????????????????????????????????????????????????????????????????????????????????????????????????????????????????????????????????????????????????????????????????????????????????????????????????????????????????????????????????????????????????????????????????????????????????????????????????????????????????????????????????????????????????????????????????????????????????????????????????????????????????????????????????????????????????????????????????????????????????????????????????????????????????????????????????????????????????????????????????????????????????????????????????????????????????????????????????????????????????????????????????????????????????????????????????????????????????????????????????????????????????????????????????????????????????????????????????????????????????????????????????????????????????????????????????????????????????????????????????????????????????????????????????????????????????????????????????????????????????0000?100?0?1????0?0?0?1???00?0?00000?????031?1?0?0001???010??0????0000???????0101000?010?0000000000??00200000???1????002000203?11102????????????????????????????????????????????????????????????????????????

Arctocephalus_sp TGGTGCCCCCCACGGAAGGCCCCGTTGCCTCCACCACCCCGTATGTGGAGGACACCCCGGAGCCACCTCTCCATGACTTCTACTGCAGCAAGCTTCTGGACCTGGTTTTCCTGCTAGATGGCTCCTCCAAGCTGTCTGAGGGCGAGTTTGAAGTGCTGAAAGTCTTTGTGGTGGGCATGATGGAGCGTCTGCACATCTCCCAGAAGCGGATCCGCGTGGCCATGGTGGAGTACCACGATGGCTCCCATGCCTACATCGAGCTCAAGGACCGGAAGCGACCCTCTGAGCTGCGGCGCATTGCCAGCCAGGTGAAGTACGTGGGCAGCGAGGTGGCCTCCACCAGCGAGGTCTTGAAGTACACACTGTTCCAGATCTTCGGCAAGATCGACCGCCCCGAAGCGTCCCGCATCGCCCTGATCCTCATGGCCAGCCAGGAGCCCCCGAGGCTGGCCCGGAATTTGATCCGCTATGTGCAGGGCCTGAAGAAGAAGAAAGTCATTGTGATCCCCGTGGGCATCGGGCCCCACGCCAACCTCAAGCAGATCCGAAACATCGAGAAGCAGGCCCCCGAGAACAAGGCCTTTGTGCTCAGTGGTGTGGACGAGCTGGAGCAGCGAAGAGATGAGATTATCAGCTACCTCTGTGACCTTGCCCCGGAAGCACCTGCCCCTACTCAGCACCCCCCTATGGTTCCGGTCACTGTGGGTCCAGAGCTCTTGGGGGTTCCATCATCGGGACCCAAAAGGAACTCCATGGTTCTGGATGTGGTGTTTGTCCTGGAAGGGTCAGACAAAATTGGTGAGGCCAACTTTAACAAGAGCAGGGAGTTCATGGAGGAGGTGATTCAGCGGATGGACGTGGGCCAGGACAGCATCCACGTCACGGTGCTGCAGTACTCCTACACGGTGGCTGTGGAGTACACCTTCAGCGAGGCCCAGTCCAAGGGGGAGGTCCTGCAGCACGTGCGGGAGATCCGATACCGGGGCGGCAACAGGACCAACACCGGGCTGGCCCTGCAGTACCTGTCTGAACACAGCTTCTCTGTCAGCCAGGGGGATCGGGAGCAGGTCCCTAACCTGGTCTACATGGTCACAGGAAACCCCGCCTCTGATGAGATCAAGCGGATGCCTGGAGACATCCAGGTGGTGCCCATTGGAGTGGGCCCTCACGCCGATGTGCAGGAGCTGCAGA???????????????????????????????????????????????????????????????????????????????????????????????????????????????????????????????????????????????????????????????????????????????????????????????????????????????????????????????????????????????????????????????????????????????????????????????????????????????????????????????????????????????????????????????????????????????????????????????????????????????????????????????????????????????????????????????????????????????????????????????????????????????????????????????????????????????????????????????????????????????????????????????????????????????????????????????????????????????????????????????????????????????????????????????????????????????????????????????????????????????????????????????????????????????????????????????????????????????????????????????????????????????????????????????????????????????????????????????????????????????????????????????????????????????????????????????????????????????????????????????????????????????????????????????????????????????????????????????????????????????????????????????????????????????????????????????????????????????????????????????????????????????????????????????????????????????????????????????????????????????????????????????????????????????????????????????????????????????????????????????????????????????????????????????????????????????????????????????????????????????????????????????????????????????????????????????????????????????????????????????????????????????????????????????????????????????????????????????????????????????????????????????????????????????????????????????????????????????????????????????????????????????????????????????????????????????????????????????????????????????????????????????????????????????????????????????????????????????????????????????????????????????????????????????????????????????????????????????????????????????????????????????????????????????????????????????????????????????????????????????????????????????????????????????????????????????????????????????????????????????????????????????????????????????????????????????????????????????????????????????????????????????????????????????????????????????????????????????????????????????????????????????????????????????????????????????????????????????????????????????????????????????????????????????????????????????????????????????????????????????????????????????????????????????????????????????????????????????????????????????????????????????????????????????????????????????????????????????????????????????????????????????????????????????????????????????????????????????????????????????????????????????????????????????????????????????????????????????????????????????????????????????????????????????????????????????????????????????????????????????????????????????????????????????????????????????????????????????????????????????????????????????????????????????????????????????????????????????????????????????????????????????????????????????????????????????????????????????????????????????????????????????????????????????????????????????????????????????????????????????????????????????????????????????????????????????????????????????????????????????????????????????????????????????????????????????????????????????????????????????????????????????????????????????????????????????????????????????????????????????????????????????????????????????????????????????????????????????????????????????????????????????????????????????????????????????????????????????????????????????????????????????????????????????????????????????????????????????????????????????????????????????????????????????????????????????????????????????????????????????????????????????????????????????????????????????????????????????????????????????????????????????????????????????????????????????????????????????????????????????????????????????????????????????????????????????????????????????????????????????????????????????????????????????????????????????????????????????????????????????????????????????????????????????????????????????????????????????????????????????????????????????????????????????????????????????????????????????????????????????????????????????????????????????????????????????????????????????????????????????????????????????????????????????????????????????????????????????????????????????????????????????????????????????????????????????????????????0111100000100230320122100021300010100???2110?130?3001??120111010?0?0?????1???01130001100000115033120?2120110021011010111010102?????2100311011000101211012102111???????11010111?101011101011010011100000?????

Arctodus_simus ??????????????????????????????????????????????????????????????????????????????????????????????????????????????????????????????????????????????????????????????????????????????????????????????????????????????????????????????????????????????????????????????????????????????????????????????????????????????????????????????????????????????????????????????????????????????????????????????????????????????????????????????????????????????????????????????????????????????????????????????????????????????????????????????????????????????????????????????????????????????????????????????????????????????????????????????????????????????????????????????????????????????????????????????????????????????????????????????????????????????????????????????????????????????????????????????????????????????????????????????????????????????????????????????????????????????????????????????????????????????????????????????????????????????????????????????????????????????????????????????????????????????????????????????????????????????????????????????????????????????????????????????????????????????????????????????????????????????????????????????????????????????????????????????????????????????????????????????????????????????????????????????????????????????????????????????????????????????????????????????????????????????????????????????????????????????????????????????????????????????????????????????????????????????????????????????????????????????????????????????????????????????????????????????????????????????????????????????????????????????????????????????????????????????????????????????????????????????????????????????????????????????????????????????????????????????????????????????????????????????????????????????????????????????????????????????????????????????????????????????????????????????????????????????????????????????????????????????????????????????????????????????????????????????????????????????????????????????????????????????????????????????????????????????????????????????????????????????????????????????????????????????????????????????????????????????????????????????????????????????????????????????????????????????????????????????????????????????????????????????????????????????????????????????????????????????????????????????????????????????????????????????????????????????????????????????????????????????????????????????????????????????????????????????????????????????????????????????????????????????????????????????????????????????????????????????????????????????????????????????????????????????????????????????????????????????????????????????????????????????????????????????????????????????????????????????????????????????????????????????????????????????????????????????????????????????????????????????????????????????????????????????????????????????????????????????????????????????????????????????????????????????????????????????????????????????????????????????????????????????????????????????????????????????????????????????????????????????????????????????????????????????????????????????????????????????????????????????????????????????????????????????????????????????????????????????????????????????????????????????????????????????????????????????????????????????????????????????????????????????????????????????????????????????????????????????????????????????????????????????????????????????????????????????????????????????????????????????????????????????????????????????????????????????????????????????????????????????????????????????????????????????????????????????????????????????????????????????????????????????????????????????????????????????????????????????????????????????????????????????????????????????????????????????????????????????????????????????????????????????????????????????????????????????????????????????????????????????????????????????????????????????????????????????????????????????????????????????????????????????????????????????????????????????????????????????????????????????????????????????????????????????????????????????????????????????????????????????????????????????????????????????????????????????????????????????????????????????????????????????????????????????????????????????????????????????????????????????????????????????????????????????????????????????????????????????????????????????????????????????????????????????????????????????????????????????????????????????????????????????????????????????????????????????????????????????????????????????????????????????????????????????????????????????????????????????????????????????????????????????????????????????????????????????????????????????????????????????????????????????????????????????????????????????????????????????????????????????????????????????????????????????????????????????????????????????????????????????????????????????????????????????????????????????????????????????????????????????????????????????????????????????????????????????????????????????????????????????????????????????????????????????????????????????????????????????????????????????????????????????????????????????????????????????????????????????????????????????????????????????????????????????????????????????????????????????????????????????????????????????????????????????????????????????????????????????????????????????????????????????????????????????????????????????????????????????????????????????????????????????????????????????????????????????????????????????????????????????????????????????????????????????????????????????????????????????????????????????????????????????????????????????????????????????????????????????????000011000100110?00?33010123020?00?000???2000?120200020??100110???000000??0???000?0??100?0???03200?????????0???????0????????2????????????0??????????????????????????????????????????????????????????0????????

Brachypsalis_sp ??????????????????????????????????????????????????????????????????????????????????????????????????????????????????????????????????????????????????????????????????????????????????????????????????????????????????????????????????????????????????????????????????????????????????????????????????????????????????????????????????????????????????????????????????????????????????????????????????????????????????????????????????????????????????????????????????????????????????????????????????????????????????????????????????????????????????????????????????????????????????????????????????????????????????????????????????????????????????????????????????????????????????????????????????????????????????????????????????????????????????????????????????????????????????????????????????????????????????????????????????????????????????????????????????????????????????????????????????????????????????????????????????????????????????????????????????????????????????????????????????????????????????????????????????????????????????????????????????????????????????????????????????????????????????????????????????????????????????????????????????????????????????????????????????????????????????????????????????????????????????????????????????????????????????????????????????????????????????????????????????????????????????????????????????????????????????????????????????????????????????????????????????????????????????????????????????????????????????????????????????????????????????????????????????????????????????????????????????????????????????????????????????????????????????????????????????????????????????????????????????????????????????????????????????????????????????????????????????????????????????????????????????????????????????????????????????????????????????????????????????????????????????????????????????????????????????????????????????????????????????????????????????????????????????????????????????????????????????????????????????????????????????????????????????????????????????????????????????????????????????????????????????????????????????????????????????????????????????????????????????????????????????????????????????????????????????????????????????????????????????????????????????????????????????????????????????????????????????????????????????????????????????????????????????????????????????????????????????????????????????????????????????????????????????????????????????????????????????????????????????????????????????????????????????????????????????????????????????????????????????????????????????????????????????????????????????????????????????????????????????????????????????????????????????????????????????????????????????????????????????????????????????????????????????????????????????????????????????????????????????????????????????????????????????????????????????????????????????????????????????????????????????????????????????????????????????????????????????????????????????????????????????????????????????????????????????????????????????????????????????????????????????????????????????????????????????????????????????????????????????????????????????????????????????????????????????????????????????????????????????????????????????????????????????????????????????????????????????????????????????????????????????????????????????????????????????????????????????????????????????????????????????????????????????????????????????????????????????????????????????????????????????????????????????????????????????????????????????????????????????????????????????????????????????????????????????????????????????????????????????????????????????????????????????????????????????????????????????????????????????????????????????????????????????????????????????????????????????????????????????????????????????????????????????????????????????????????????????????????????????????????????????????????????????????????????????????????????????????????????????????????????????????????????????????????????????????????????????????????????????????????????????????????????????????????????????????????????????????????????????????????????????????????????????????????????????????????????????????????????????????????????????????????????????????????????????????????????????????????????????????????????????????????????????????????????????????????????????????????????????????????????????????????????????????????????????????????????????????????????????????????????????????????????????????????????????????????????????????????????????????????????????????????????????????????????????????????????????????????????????????????????????????????????????????????????????????????????????????????????????????????????????????????????????????????????????????????????????????????????????????????????????????????????????????????????????????????????????????????????????????????????????????????????????????????????????????????????????????????????????????????????????????????????????????????????????????????????????????????????????????????????????????????????????????????????????????????????????????????????????????????????????????????????????????????????????????????????????????????????????????????????????????????????????????????????????????????????????????????????????????????????????????????????????????????????????????????????????????????????????????????????????????????????????????????????????????????????????????????????????????????????????????????????????????????????????????????????????????????????????????????????????????????????????????????????????????????????????????????????????????????????????????????????????????????????????0000100?00000?0?00000?001200?1?01000?????00(0 1)?1???0?02?0?010?00?0??0?0?00?????011?01000000001000?00200200120(0 1)1211110?00312010111??1?2???????????????0001010?0??????0????????0100?01?0????01011000????????????

Broiliana_nobilis ??????????????????????????????????????????????????????????????????????????????????????????????????????????????????????????????????????????????????????????????????????????????????????????????????????????????????????????????????????????????????????????????????????????????????????????????????????????????????????????????????????????????????????????????????????????????????????????????????????????????????????????????????????????????????????????????????????????????????????????????????????????????????????????????????????????????????????????????????????????????????????????????????????????????????????????????????????????????????????????????????????????????????????????????????????????????????????????????????????????????????????????????????????????????????????????????????????????????????????????????????????????????????????????????????????????????????????????????????????????????????????????????????????????????????????????????????????????????????????????????????????????????????????????????????????????????????????????????????????????????????????????????????????????????????????????????????????????????????????????????????????????????????????????????????????????????????????????????????????????????????????????????????????????????????????????????????????????????????????????????????????????????????????????????????????????????????????????????????????????????????????????????????????????????????????????????????????????????????????????????????????????????????????????????????????????????????????????????????????????????????????????????????????????????????????????????????????????????????????????????????????????????????????????????????????????????????????????????????????????????????????????????????????????????????????????????????????????????????????????????????????????????????????????????????????????????????????????????????????????????????????????????????????????????????????????????????????????????????????????????????????????????????????????????????????????????????????????????????????????????????????????????????????????????????????????????????????????????????????????????????????????????????????????????????????????????????????????????????????????????????????????????????????????????????????????????????????????????????????????????????????????????????????????????????????????????????????????????????????????????????????????????????????????????????????????????????????????????????????????????????????????????????????????????????????????????????????????????????????????????????????????????????????????????????????????????????????????????????????????????????????????????????????????????????????????????????????????????????????????????????????????????????????????????????????????????????????????????????????????????????????????????????????????????????????????????????????????????????????????????????????????????????????????????????????????????????????????????????????????????????????????????????????????????????????????????????????????????????????????????????????????????????????????????????????????????????????????????????????????????????????????????????????????????????????????????????????????????????????????????????????????????????????????????????????????????????????????????????????????????????????????????????????????????????????????????????????????????????????????????????????????????????????????????????????????????????????????????????????????????????????????????????????????????????????????????????????????????????????????????????????????????????????????????????????????????????????????????????????????????????????????????????????????????????????????????????????????????????????????????????????????????????????????????????????????????????????????????????????????????????????????????????????????????????????????????????????????????????????????????????????????????????????????????????????????????????????????????????????????????????????????????????????????????????????????????????????????????????????????????????????????????????????????????????????????????????????????????????????????????????????????????????????????????????????????????????????????????????????????????????????????????????????????????????????????????????????????????????????????????????????????????????????????????????????????????????????????????????????????????????????????????????????????????????????????????????????????????????????????????????????????????????????????????????????????????????????????????????????????????????????????????????????????????????????????????????????????????????????????????????????????????????????????????????????????????????????????????????????????????????????????????????????????????????????????????????????????????????????????????????????????????????????????????????????????????????????????????????????????????????????????????????????????????????????????????????????????????????????????????????????????????????????????????????????????????????????????????????????????????????????????????????????????????????????????????????????????????????????????????????????????????????????????????????????????????????????????????????????????????????????????????????????????????????????????????????????????????????????????????????????????????????????????????????????????????????????????????????????????????????????????????????????????????????????????????????????????????????????????????????????????????????????????????????????????????????????????????????????????????????????????????????????????????????????????????????????????????????????????????????????????????????????????????????????????????????000000001000??200?0?0??0??31?1?00?00????20220100001000??010?00????0?00?00????????0???000000103000010000000000???1?0?????0???20?????2????????????????????????????????????????????????????????????????????????

Callorhinus_ursinus TGGTGCCCCCCACGGAAGGCCCCGTTGCCTCCACCACCCCGTATGTGGAGGACACCCCGGAGCCACCTCTCCATGACTTCTACTGCAGCAAGCTTCTGGACCTGGTTTTCCTGCTAGATGGCTCCTCCAAGCTGTCTGAGGACGAGTTTGAAGTGCTGAAAGTCTTTGTGGTGGGCATGATGGAGCGTCTGCACATCTCCCAGAAGCGGATCCGCGTGGCCATGGTGGAGTACCACGATGGCTCCCATGCCTACATCGAGCTCAAGGACCGGAAGCGACCCTCAGAGCTGCGGCGCATCGCCAGCCAGGTGAAGTACGTGGGCAGCGAGGTGGCCTCCACCAGCGAGGTCTTGAAGTACACACTGTTCCAGATCTTCGGCAAGATYGACCGCCCCGAAGCGTCCCGCATCGCCCTGATCCTCATGGCCAGCCAGGAGCCCCCGAGGCTGGCCCGGAATTTGATCCGCTATGTGCAGGGCCTGAAGAAGAAGAAAGTCATTGTGATCCCCGTGGGCATCGGGCCCCACGCCAACCTCAAGCAGATCCGAAACATCGAGAAGCAGGCCCCCGAGAACAAGGCCTTTGTGCTCAGTGGTGTGGACGAGCTGGAGCAGCGAAGAGATGAGATTATCAGCTACCTCTGTGACCTTGCCCCGGAAGCACCTGCCCCTACTCAGCACCCCCCTATGGTTCCGGTCACTGTGGGTCCAGAGCTCTTGGGGGTTCCATCATCGGGACCCAAAAGGAACTCCATGGTTCTGGATGTGGTGTTTGTCCTGGAAGGGTCAGACAAAATTGGTGAGGCCAACTTTAACAAGAGCAGGGAGTTCATGGAGGAGGTGATTCAGCGGATGGACGTGGGCCAGGACAGCATCCACGTCACGGTGCTGCAGTACTCCTACACGGTGGCTGTGGAGTACACCTTCAGCGAGGCCCAGTCCAAGGGGGAGGTCCTGCAGCACGTGCGGGAGATCCGATACCGGGGCGGCAACAGGACCAACACCGGGCTGGCCCTGCAGTACCTGTCTGAACACAGCTTCTCTGTCAGCCAGGGGGATCGGGAGCAGGTCCCTAACCTGGTCTACATGGTCACAGGAAACCCCGCCTCTGATGAGATCAAGCGGATGCCTGGAGACATCCAGGTGGTGCCCATTGGAGTGGGCCCTCACGCCGATRTGCAGGAGCTGCAGATAAAGACAGAATGAATGTAGAGAAGGCTGAATTCTGTAATAAAAACAAACAGCCTGGCTTAGCAAGGAGCCAACAAAGCAGATGGGCTGAAAGTAAGGAAACACGTAATGATAGGCAGACTCCCAGCACAGAGAAAAAGGTACTTCTGAATGCTGATCCCCTGTGTGGGAGAAAAGAACTGAAGAAACAGAAACCTCCATGCTCTGACAGTCCTAGAGATTCCCAAGATGTTCCTTGGATAACACTGAATAGTAGCATACAGAAAGTTAATGAGTGGTTTTCCAGAAGTGATGAAGTGTTAACTTCC---GATGACTCACATGACGGGGGATCTGAATCGAATACTGAAGTAGCTGGTGCAATAGAAGTTCCAAATGAAGTGGACGGATATTCTGTTTCTTCTGAGAAAATAGACTTAATGGCCAGTGATCCTCAGGATGCTTTGATATGTGAAAGTGAAAGAATCCACACCAAGTCAGTAGAGAGTAATATCGAAGATAAAATATTTGGGAAAACCTACCGGAGGAAGGCAAGCCTCCCTAACGTGAGCTACACGAATGAAGATCTTATTACAGGAGCATGTCCTATAGAACCTCAGACAGCGCGAGCCCATCCCCTCACGAATAAAGCAAAGCGTAAAAGGAGAACTACATCAGGCCTTCATCCTGAGGATTTTATCAAGAAAGTAGATTTGGCCATTGTTCCAAAGACTCCTGAAGAGCTAGTTGAGGGAACCGACCAAATCGAGCGAAATGGTCATGTGATGAATATTACAAATAATGGTCCTGAGAATGAAACAAAAGGTGATTATGTTCAGAATGAGAAAAATGCTAACCCAACAGAATCATTGGAAAAAGAACCTGCTTTTAGAAGCAAAGCTGAACCGATAAGCAGCAGTATAATCACTATGGAACTGGAATTAAATAGCTCCAGTTCGAAAGCCCCTAAGAAGAACAGGCTGAGGAGGAAGTCCTCCACCAGGCACGCTTGTGCGCTTGAATTTGTAGTTAGTGGAAATCCAAGCCCACTTGATCATAGCGAACTACAGAACCATCAGAGTTTCTCTGCTGGAAACAATGAGAATAGCACTGAGGCCCACATAGGAATAAATGGAGAAGCCAACCTGGATTTCCTCAACATTCCTTTGACAATTCCTGAAATGACTCTACCTTACACAATGCTCACAACTCCCCAGGTGAAAGATTTCTCCTTGTGGGAAAAAACAGGCTTGAAGGATTTCTTGAAGACAACAAAGCAATCATTTGATTTAAGTGTAAAGGCCCAGTATAAGAAAAATAAAGACAAACATATCATCCCAATTCCTTTTTATGCAAAAGATTTCCAGGTATTGAGTACCCCAAATGATATTTTCATTCCAGCCATGGGCAATGTTACCTATGACTTTTCTTTTAAATCAGGCGTCATCACGCTGAATACCAATGTTGGACTGTATAACCAGTCAGATATTGTTGCTCATTTCCTAAGTTCCTCTTCTTCTGTTACTGATGCACTGCAGTACAAATTAGAGGGCACCTCAAGTCTGACAAGGAAAAGAGGCTTGAAGCTAGCCACAGCTTTGTCTCTGACTAATAAATTCGTGGAAGGCAATCATGACAATACTATTAGTTTGACCAAGAAAAACATGGAGGCATCAGTGACAACATCTGCAAAAGTCCAAATTCCCATTTTGAGAATGAATTTCAAGCAAGAACTTAATGGAAATACCAAGTCGAAGCCTACTGTCTCTTCATCCATTGAATTAACGTATGATCTCAATTCCCCTGAACTGTACTCTACTGCCACAGGGACAGTCAAACACAAACTCAACTTAGAGAGCCTCACCTCTTACTTTTCCATTGAGTCATCTACCAAAGGGGATATCAAGGGTTCAGTACTTTCAAGGGAATATTCAGGAACTATTGCCAGTGAGGCCAGCACTTACTTGAATTCCAAGAGTACTCGGTCTTCAGTGAAGCTGCAAGGGGCTTCCAAAGTTGATGGTATCTGGAACCCATGAGAGCCCAAGACCTTGATGACTACCTGAATGGCCCCTTCACCGTTGTGGTGAAGGAGTCTTGTGACGGAATGGGAGATGTGAGCGAGAAGCACGGGAGCGGGCCAGCAGTTCCAGAAAAGGCAGTTCGGTTTTCGTTCACGGTCATGAAAATTACTGTAGCCCATGGCTCAGAAAATGTGAAGGTGTTTGAAGAAGTCAAACCCAACTCTGAACTGTGTTGTAAGCCCCTGTGTCTYATGCTGGCAGATGAGTCTGACCACGAGACCCTGACGGCCATCCTGAGTCCTCTCATTGCCGAGAGGGAGGCCATGAAGAGCAGCCAATTAATGCTTGAGATGGGAGGCATCCTTCGGACTTTCAAGTTCATCTTCAGGGGCACCGGATATGATGAGAAACTCATCCGGGAAGTCGAAGGCCTCGAGGCTTCTGGCTCAGTCTACATTTGTACCCTTTGTGACACCACCCGCCTAGAAGCCTCTCAAAATCTTGTCTTCCACTCCATCACCAGAAGCCACTCTGAGAACCTGGAGCGCTATGAGGTCTGGCGATCCAACCCATACCAYGAGTCAGTGGAAGAACTGCGGGATCGGGTGAAAGGGGTCTCATCGAAACCTTTCATCGAGACTGTCCCTTCCATAGATGCACTCCACTGTGACATTGGCAACGCGGCTGAGTTCTACAAGATTTTCCAGCTAGAGATAGGGGAGGTGTATAGGAATCCCAATGCTTCCAAAGAGGAAAGGAAAAGATGGCAGGCTACATTGGACAAGCATCTCCGGAAGAAGATGAACCTGAAACCCATCATGAGGATGAATGGCAACTTTGCCAGGAAGCTCATGACCAAAGAGACAGTTGAAGCAGTTTGTGAATTAATTCCCTCTGAGGAGAGGCATGAAGCTCTGAGGGAGCTGATGGACCTTTACCTGAAGATGAAGCCTGTATGGCGATCAACGTGTCCRGCAAAAGAGTGCCCAGAATCCCTCTGCCAGTATAGCTTCAATTCACAGCGTTTTGCTGAGCTCCTTTCTACCAAGTTCAAGTATAGATATGAGGGCAAAATCACCAATTATTTTCACAAAACCCTGGCACA????GCCCATGTGCTGACCACCGGGGTGCAGAGCTCCTTGAACGACCCTCGCCTGGTCATCTCATATGAGCCCAGCACTCTTGAGGCTCCCCGGCAAGCCCCAGCACTCACCAACCTCACACAAGAGGAACAGCTTGCCCGGTTGCAGAAGGGCATCCGCCATGAGGTTCTGGAGGGCAATGTGGGCTACCTGCGTATGGACGACATCCCAGGCCAGGAGGTGGTGAGCAAGCTGGGGGGCTTCCTGGTGGCCAGCGTCTGGAGGAAGCTCATGGGCACCTCTGCCTTGGTGCTAGACCTCCGGCACTGCACTGGGGGCCACATTTCCGGCATCCCCTACGTCATCTCCTACCTACACCCAGGGAACACGGTCCTGCACGTAGATACCATCTACAACCGCCCCTCCAATACAACCACTGAGATCTGGACCCTGCCCCAGGTCCTAGGAGAAAGGTACAGTGCCGACAAGGATGTGGTGGTCCTCACCAGCGGCCACACGGGGGGCGTGGCTGAGGACATCACTTACATCCTCAAACAGATGCGCAGGGCCATCGTGGTGGGTGAGCGGACTGTGGGGGGTGCCCTGGACCTCCAGAAGCTGCGGATAGGCCAGTCCGACTTCTTCCTCACTGTGCCCGTGTCCAGGTCCCTAGGGCCCCTGGGAGGGGGCAGCCAGACATGGGAGGGCAGTGGAGTGCTGCCCTGTGTGGGGACACCAGCAGAGCAGGCGCTCGAGAAAGCCCTGGCCATCCTCACTCTGCGCCGGGCCCTGCCAGGAGTTGTGCAGCGCCTGCAGGAGGCACTGCAGGCCTACTACACGCTGGTGGACCGCGTGCCCACCCTGCTGCACCACCTGGCCAACATGGACTTCTCTACGGTGGTCTCCGAGGAGGACCTGGTCACGAAGCTCAACGCTGGTCTACAGACTGCGTCTGAGGACCCCAGGCTCCTGGTGCGGGCCGTCAGGCCCAAGGAAACCCTTTCTGGGCCTGAGGTTGGAGACGATGACCCTCCGGAGGTGGTCCCCACAGTGGCCGAGGATGAGGCTGTCCGGCGGGCCCTGGTGGACTCTATGTTCCAGGTGTCCGTGCTGCCGGGCAACGTGGGCTACCTCCGCTTTGACAGCTTTGCCGACGCCTCCGTGCTGGAGGTGCTGAGCCCATACATCGTGCGCCAGGTGTGGGAGCCCCTG00211000001002303200221000213000101000012110013001001001201110101010010011021011300011000000150331????1???22???????101?3???102?????210031?0?1000101211012102(1 2)11111011111010101110101100100111001110??0010001

Canis_lupus TGGTGCCCCCCACAGAAGGCCCCATTGGCTCTACCACCTCGTATGTGGAGGACACGCCGGAGCCGCCCCTCCATGACTTCCACTGCAGCAGGCTTCTGGACCTGGTTTTCCTGCTGGATGGCTCCTCCAAGCTGTCTGAGGACGAGTTTGAAGTGCTGAAGGTCTTTGTGGTGGGTATGATGGAGCATCTGCACATCTCCCAGAAGCGGATCCGCGTGGCTGTGGTGGAGTACCACGACGGCTCCCACGCCTACATCGAGCTCAAGGACCGGAAGCGACCCTCAGAGCTGCGGCGCATCACCAGCCAGGTGAAGTACGCGGGCAGCGAGGTGGCCTCCACCAGTGAGGTCTTAAAGTACACGCTGTTCCAGATCTTTGGCAAGATCGACCGCCCGGAAGCGTCTCGCATTGCCCTGCTCCTGATGGCCAGCCAGGAGCCCTCAAGGCTGGCCCGGAATTTGGTCCGCTATGTGCAGGGCCTGAAGAAGAAGAAAGTCATTGTCATCCCTGTGGGCATCGGGCCCCACGCCAGCCTTAAGCAGATCCACCTCATAGAGAAGCAGGCCCCTGAGAACAAGGCCTTTGTGTTCAGTGGTGTGGATGAGTTGGAGCAGCGAAGGGATGAGATTATCAACTACCTCTGTGACCTTGCCCCCGAAGCACCTGCCCCTACTCAGCACCCCCCAATGGCCCAGGTCACGGTGGGTTCGGAGCTGTTGGGGGTTTCATCTCCAGGACCCAAAAGGAACTCCATGGTCCTGGATGTGGTGTTTGTCCTGGAAGGGTCAGACAAAATTGGTGAGGCCAACTTTAACAAAAGCAGGGAGTTCATGGAGGAGGTGATTCAGCGGATGGACGTGGGCCAGGACAGGATCCACGTCACAGTGCTGCAGTACTCGTACATGGTGACCGTGGAGTACACCTTCAGCGAGGCGCAGTCCAAGGGCGAGGTCCTACAGCAGGTGCGGGATATCCGATACCGGGGTGGCAACAGGACCAACACTGGACTGGCCCTGCAATACCTGTCCGAACACAGCTTCTCGGTCAGCCAGGGGGACCGGGAGCAGGTACCTAACCTGGTCTACATGGTCACAGGAAACCCCGCTTCTGATGAGATCAAGCGGATGCCTGGAGACATCCAGGTGGTGCCCATCGGGGTGGGTCCACATGCCAATGTGCAGGAGCTGGAGATAAACACAGAATGAATGTAGAAAAGGCTGAAATCTGTAATAACAGCAAACAGCCTGGCTTAGCAAGGAGCCAACAGAGCAGATGGGCTGAAAGTAAGGAAACATGTAATGATAGGCAGATTCCCAGCACAGAGAAAAAGGTAGTTGTGAATGCTGATCTCCTGTGTGGGAGAAAAGAACTGAATAAACAGAAACCTCCACACTCTGATAGTCCTAGAGATTCCCAAGATGTTCCTTGGATAACACTGAATAGTAGCATACGGAAAGTTAATGAGTGGTTTTCCAGAAGTGACGAAATATTAACTTCT---GATGATTCACATGACAGAGGATCTGAATTGAATACTGAAGTAGGTGGTGCAGTAGAAGTTCCAAATGAAGTGGGTGAATATTCTGGTTCTTCTGAGAAAATAGACTTAATGGCCAGTGATCCTCAGGATGCTTTCATATGTGAAAGTGAAAGAGTCCACACCAAGCCAGTAGGAGGTAATATCGAAGATAAAATATTTGGAAAAACCTATCGGAGGAAGGCAAGCCTCCCTAAGGTGAGCCACACAACTGAAGTTCTAACTATAGGAGCGTGTGCTATAGAACCTCAGACAATGCAAACCCATCCCTTCATGAATAAAGCAGAGCATAAAAGGAGAACTACATCTAGCCTTCATCCTGAGGATTTTATCAAGAAAGTAGAGTTAGGCATTGTTCCAAAGACTCCTGAAAAGCTAATTGAGGGAATCAACCAAATCAAGCGAGATGGTCATGTGATAAATATTACAAATAATGGTCCTGAGAATGAAACAGAAGGTGATTATGTTCAGAAAGAGAAAAATGCTAACCCAACAGAATCATTGGAAAAAGAATCTGCTTTTAGGACCAAAACTGAACCAATGAGCAGCAGGATAAGCAATATGGAACTGGAATTAAATAGCTCCAGTTCAAAAGCACCTAAGAAGAACAGGCTGAGGAGGAAGTCCTCTGCCAGGCACACTTGTGCCCTTGAATTCGTAGTCAATAGAAATCTAAACCCACCTGATCATAGTGAACTACAGAACCATCATAATTTCTCTGCTGGAAACAATGAGAACAGTGTTGAGGCCCACATAGGAATAAATGGAGAAGCCAACCTGGATTTCCTCAACATTCCTTTGACAATTCCTGAAATGACTCTACCTTACACAACACTCACAACTCCCCACGTGAAAGATTTCTCCTTATGGGAAAAAACAGGCTTGAAGGAATTCTTGAAGACGACAAGGCAGTCATTTGATTTAAGTGTAAAGTCTCAGTATAAGAAAAACAAAGATAAGCATATCATCCCAATTCATTTTTACATGAAAGATTTCCAGGTATTGAGTACCCCAGGTGATATTTTCATTCCAGCCATGGGCAACATTACCTATGACTTTTCCTTTAAATCAGGCCTCATCACACTAAATACCAATGTTGGACTATATAACCAGTCAGATATTGTTGCTCATTTCCTAACATCCTCTTCTTCTGTCATTGATGGACTGCAGTACAAATTAGAGGGCACCTCAAGTTTGACGAGGAAAAGAGGCTTGAAGCTAGCTACAGCTTTGTCTCTGAGTAATAAATTTGTGGAGGGCAATCATGACAGTACTATTAGTTTGACCAAGAAAAACATGGAGGCATCAGTGACAACCTCTGCAAAAGTCCAAATTCCCATTTTGAGAATGAATTTCAAGCAAGAACTTAATGGGAATACCAAGTCAAAGCCTACTGTCTCTTCATCCATTGAATTAATATATGATCTCAATTCCCCCAAACTCTACTCTACTGCTACAGGGAGAGTCAACCACAAACTCAGCTTAGAGAGCCTCACCTCTTACTTTTCCATTGAGTCATCTACCAAAGGAGATGTCAAGGGTTCAGTCCTTTCACGGGAATATTCAGGATCTATTGCCRGTGAGGCCAGCACTTACTTGAATTCCAAGAGTACTCGGACTTCAGTGAAGCTGCAAGGGGCTTCCAAAGTTGATGGTATCTGGAACCCATGAGATCCCAAGACCTTGATGATTACCTGAATGGCCCCTTCACTGTGGTGGTGAAGGAGTCTTGTGATGGAATGGGAGACGTGAGTGAGAAGCATGGGAGTGGGCCTGTAGTTCCAGAAAAGGCAGTCCGTTTTTCATTCACAATCATGAAAATTACTATTGCCCACAGCTCTCAGAATGTGAAAGTATTTGAAGAAGCCAAACCTAACTCTGAACTGTGTTGCAAGCCATTGTGCCTTATGCTGGCAGATGAGTCTGACCACGAGACGCTGACTGCCATCCTGAGTCCTCTCATTGCTGAGAGGGAGGCCATGAAGAGCAGTGAATTAATGCTTGAGCTGGGAGGCATTCTCCGGACTTTCAAGTTCATCTTCAGGGGCACCGGCTATGATGAAAAACTTGTGCGGGAAGTGGAAGGCCTCGAGGCTTCTGGCTCAGTCTACATTTGTACTCTTTGTGATGCCACCCGTCTGGAAGCCTCTCAAAATCTTGTCTTCCACTCTATAACCAGAAGCCATGCTGAGAACCTGGAACGTTATGAGGTCTGGCGTTCCAACCCTTACCATGAGTCTGTGGAAGAACTGCGGGATCGGGTGAAAGGGGTCTCAGCTAAACCTTTCATTGAGACAGTCCCTTCCATAGATGCACTCCACTGTGACATTGGCAATGCAGCTGAGTTCTACAAGATCTTCCAGCTAGAGATAGGGGAAGTGTATAGGAATCCCAATGCTTCCAAAGAGGAAAGGAAAAGGTGGCAGGCCACACTGGACAAGCATCTCCGGAAGAAGATGAACCTCAAACCAATCATGAGGATGAATGGCAACTTTGCCAGGAAGCTCATGACCAAAGAGACTGTGGATGCAGTTTGTGAGTTAATTCCTTCCGAGGAGAGGCACGAGGCTCTGAGGGAGCTGATGGATCTTTACCTGAAGATGAAACCAGTATGGCGATCATCATGCCCTGCTAAAGAGTGCCCAGAATCCCTCTGCCAGTACAGTTTCAATTCACAGCGTTTTGCTGAGCTCCTTTCTACGAAGTTCAAGTATAGGTATGAGGGAAAAATCACCAATTATTTTCACAAAACCCTGGCCCA????GCCCACGTGCTGACCACTGGGGTGCAGAACTCCTTGAACGACCCTCGCCTGGTCATCTCGTACGAGCCCAGCACCCTCGAGGCTCCCCGGCAAGTCCCGGCCCTCACCAACCTCACCCGGGAGGAACTGCTTGCCCGCCTGCAGAAGGGCATCCGCCACGAGGTGCTGGAGGGCAACGTGGGCTACCTGCGCGTGGACGACATCCCCGGCCAGGAGGTGGTGGACAAGCTGGGCAGCTTCCTGGTGGCCAGCGTCTGGAGGAAGCTCATGGGCACCTCTGCCCTGGTGCTGGACCTCCGGCACTGCACGGGCGGCCACATTTCTGGCATCCCCTACGTCGTCTCCTACCTGCACCCAGGGAACACGGTTCTGCATGTGGATACCATCTACGACCGCCCCTCCAACACCACCACTGAGATCTGGACCCTGCCCCAGGTCCTGGGGGAAAGGTACAGCGCTGACAAGGACGTGGTGGTCCTCACCAGCGGCCACACGGGCGGCGTGGCGGAGGACGTCACTTACATCCTCAAGCAGATGCGCCGGGCCATCGTGGTGGGCGAGCGGACTGTCGGGGGGGCCCTGGACCTCCAGAAGCTGAGGATAGGCCAGTCCGATTTCTTCCTCACCGTGCCCGTGTCCAGGTCCCTGGGGCCCCTGGGAGGGGGCAGCGAGACGTGGGAGGGCAGCGGGGTACTGCCCTGTGTGGGGACGCCAGCCGAGCAGGCCCTGGAGAAAGCCCTGGCCATCCTGACCCTGCGCCGCGCCCTGCCCAGCATAGTGCAGCGCCTGCAGGAGGCCCTGCAGGCTTACTACACACTGGTGGACCGCGTGCCCGCCCTGCTGCACCACCTGGCCAGTATGGACTTCTCCGCCGTGGTCTCCAGGGAGGACCTGGTCACCAAGCTCAATGCTGGTCTGCARACCGTGTCTGAGGACCCCAGGCTCCTGGTGCGGGCCGTGAGGCCCAGGGAGGGCCCTTTGGGGCCCGAGGCGGGGGACGACGACCCGCCGGAGGCGGTGCCCACGGTGCCGGACGACGAGGCTGGCCGCCGGGCCCTGGTGGACTCCATGTTCCAAACGTCCGTGCTGCCGGGCAATGTGGGCTACCTCCGCTTCGACAGCTTCGCGGCCGCCCCAGTGCTGGAGGTGCTGAGCCCGTATGTGGCGCGCCAGGTGTGGGAGCCGC??00000200000000010000011010300000000000000030?02010000100010000000000000000000010?0101000000000?00200000200000201100000321?0001??1?00?000?010000000001100110000000000000010000000000000000?010?00000??00?0?00

Cystophora_cristata ????????????????????????????????????????????????????????????????????????????????????????????????????????????????????????????????????????????????????????????????????????????????????????????????????????????????????????????????????????????????????????????????????????????????????????????????????????????????????????????????????????????????????????????????????????????????????????????????????????????????????????????????????????????????????????????????????????????????????????????????????????????????????????????????????????????????????????????????????????????????????????????????????????????????????????????????????????????????????????????????????????????????????????????????????????????????????????????????????????????????????????????????????????????????????????????????????????????????????????????????????????????????????????????????????????????????????????????????????????????????????????????????????????????????????????????????????????????????????????????????????????????????????????????????????????????????????????????????????????????????????????????????????????????????????????????????????????????????????????????????????????????????????????????????????????????????????????????????????????????????????????????????????????????????????????????????????????????????????????????????????????????????????????????????????????????????????????????????????????????????????????????????????????????????????????????????????????????????????????????????????????????????????????????????????????????????????????????????????????????????????????????????????????????????????????????????????????????????????????????????????????????????????????????????????????????????????????????????????????????????????????????????????????????????????????????????????????????????????????????????????????????????????????????????????????????????????????????????????????????????????????????????????????????????????????????????????????????????????????????????????????????????????????????????????????????????????????????????????????????????????????????????????????????????????????????????????????????????????????????????????????????????????????????????????????????????????????????????????????????????????????????????????????????????????????????????????????????????????????????????-----------TTCTCTGCTGGAAACAATGAGAACAGCACTGAGGCCCACGTAGGAATAAATGGAGAAGCCAACCTGGATTTCCTCAACATTCCTTTGACAATTCCTGAAATGACTGTACCTTACACAATGCTCACAACTCCCCAGGTGAAAGATTTCTCCTTGTGGGAGAAAACAGGCTTGAAGGATTTCTTGAAGRCAACAAAGCAATCATTTGATTTAAGTGTAAAGGCCCAGTATAAGAAAAACAAAGACAAGCATATCATCCCRATTCCTTTTTATGCAAAAGATTTCCAGGTATTGAGTACCCCAAATGATATTTTCATTCCAGCCATGGGCAATGTTACCTATGACTTTTCTTTTAAATCAGGCRTCATCACACTGAATACCAATGTTGGACTGTATAACCAGTCAGATATTGTTGCTCATTTCCTAACTTCCTCTTCTTCTGTTACTGATGCACTGCAGTACAAATTAGAGGGCACCTCAAGTTTGACGAGGAAAAGAGGCTTGAAGCTAGCCACAGCTTTGTCTCTGACTAACAAATTCGTGGAAGGCAATCATGACAGTACTATTAGTTTGACCAGGAAAAACATGGAGGCATCAGTGACAACATCTGCAAAAGTCCAAATTCCCATTTTGAGAATGAATTTCAAGCAAGAACTTAATGGAAATACCAAGTCGAAGCCTACTGTCTCTTCATCCATTGAATTAACATACGATCTCAATTCCCCTGAACTGTACTCTACTGCCACAGGGACAGTCAACCACAAACTCAACTTAGAGAGCCTCACCTCTTACTTTTCCATTGAGTCATCTACCAAAGGGGATATCAAGGGTTCAGTACTTTCAAGGGAATATTCAGGAACTATTGCCAGTGAGGCCAGCACTTACTTGAATTCCAAGAGTACTCGGTCTTCAGTGAAGCTGCAAGGGGCTTCCAAAGTTGATG???CCTGGAAGGCATGAGAGCCCAAGACCTTGATGACTACCTGAATGGCCCCTTCACTGTCGTGGTGAAGGAGTCTTGTGACGGAATGGGAGATGTGAGCGAGAAGCACGGGAGTGGGCCAGCAGTTCCAGAAAAGGCAGTTCGGTTTTCGTTCACGGTCATGAAAATTACTGTAGCCCATGGCTCAGAAAACGTGAAGGTGTTTGAAGAAGTCAAACCCAACTCCGAACTGTGTTGTAAGCCCCTGTGTCTCATGCTGGCAGATGAGTCTGACCACGAGACCCTGACGGCCATCCTGAGCCCTCTCATTGCCGAGAGGGAGGCCATGAAGAGCAGCCAATTAATGCTTGAGATGGGAGGCATCCTTCGGACTTTCAAGTTCATCTTCAGGGGCACTGGATATGATGAGAAACTCGTCCGGGAAGTCGAAGGCCTTGAGGCTTCTGGCTCAGTCTACATTTGTACCCTTTGTGACGCCACCCGCCTGGAAGCCTCTCAGAATCTTGTCTTCCACTCCATCACCAGAAGCCACTCTGAGAACCTGGAGCGCTATGAGGTCTGGCGTTCCAACCCATACCACGAGTCGGTGGAAGAACTGCGGGATCGGGTGAAAGGGGTCTCATCGAAACCTTTCATCGAGACTGTCCCTTCCATAGATGCACTCCACTGTGACATTGGCAATGCGGCTGAGTTCTACAAGATTTTCCAGCTAGAGATAGGGGAGGTGTATAAGAATCCCAATGCTTCCAAAGAGGAAAGGAAAAGATGGCAGGCTACATTGGACAAGCATCTCCGGAAGAAGATGAACCTGAAACCCATCATGAGGATGAATGGCAACTTTGCCAGGAAGCTCATGACCAAAGAGACAGTTGAAGCWGTTTGTGAATTAATTCCMTCTGAGGAGAGGCACGAAGCTCTGAGGGAGCTGATGGAYCTTTACCTGAAGATGAAGCCTGTATGGCGATCATCGTGTCCTGCAAAAGAGTGCCCAGAATCCCTCTGCCAGTATAGCTTCAATTCACAGCGTTTTGCTGAGCTCCTCTCTACCAAGTTCAAGTATAGATATGAGGGCAAAATCACCAATTATTTTCACAAAACCCTGGCACACGTCGCCCATGTGCTGACCACGGGGGTGCAGAGCTCCTTGAACGACCCTCGCCTGGTCATCTCATATGAGCCCAGCACCCTTGAGGCTCCCCGGCAAGCCCCAGCACTCACCAACCTCACACAAGAGGAACAGCTTGCCCGGTTGCAGAAGGGCATCCGCCACGAGGTTCTGGAGGGCAATGTGGGCTACCTGCGTATGGACGACATCCCAGGCCAGGAGGTGGTGAGCAAGCTGGGGGGCTTCCTGGTGACCAGCGTCTGGAGGAAGCTCATGGGCACCTCTGCCTTGGTGCTGGACCTCCGGCACTGCACTGGGGGCCATATTTCCGGCATCCCCTACGTCATCTCCTACCTACACCCAGGGAACACAGTCCTGCACGTGGATACCATCTACAACCGCCCCTCCAATACAACCACTGAGATCTGGACCCTGCCCCAGGTCCTAGGAGAAAGGTACAGTGCCGACAAGGATGTGGTGGTCCTCACCAGCGGCCACACGGGGGGCGTGGCTGAGGAYATCACTTACATCCTCAAACAGATGCGCAGGGCCATCGTGGTGGGTGAGCGGACTGTGGGGGGTGCCCTGGACCTCCAGAAGCTGCGGATAGGCCAGTCCGACTTCTTCCTCACTGTGCCCGTGTCCAGGTCCCTAGGGCCCCTGGGAGGAGGCAGCCAGACATGGGAGGGCAGCGGGGTGCTGCCCTGCGTGGGGACACCAGCAGAGCAGGCGCTCGAGAAAGCCCTGGCCATCCTCACTCTGCGCCGGGCCCTGCCAGGAGTCGTGCAGCGCCTGCAGGAGGCCCTGCAAGCCTACTACACGCTGGTRGACCGCGTGCCCACCCTGCTGCACCACCTGGCCAACATGGACTTCTCTGCGGTGGTCTCCGAGGAGGACCTGGTCACGAAGCTCAACGCTGGTCTACAGACTGCGTCTGAGGACCCCAGGCTCCTGGTGCGGGCCGTCAGGCCCAAGGAAACCTTTTCTGGGCCTGAGGTCGGAGACGATGACCCTCCGGAGGTGGTCCCCACAGTGGCCGAGGATGAGGCTGTCCGGCGGGCGCTGGTGGACTCTATGTTCCAGGTGTCCGTGCTGCCGGGCAACGTGGGCTACCTCCGCTTTGACAGCTTTGCTGACGCCTCGGTGCTGGAGGTGCTGAGCCCATACATCGTGCACCAGGTGT???????????10111200201003?1100122101100313112100???4000?201?3112???020021?222101111?222111120010100000015033120?2120122????110001002?1102?????2000211111100000100112102211101000120111121201111010020111000111?1?1?????

Desmatophoca_oregonensis ??????????????????????????????????????????????????????????????????????????????????????????????????????????????????????????????????????????????????????????????????????????????????????????????????????????????????????????????????????????????????????????????????????????????????????????????????????????????????????????????????????????????????????????????????????????????????????????????????????????????????????????????????????????????????????????????????????????????????????????????????????????????????????????????????????????????????????????????????????????????????????????????????????????????????????????????????????????????????????????????????????????????????????????????????????????????????????????????????????????????????????????????????????????????????????????????????????????????????????????????????????????????????????????????????????????????????????????????????????????????????????????????????????????????????????????????????????????????????????????????????????????????????????????????????????????????????????????????????????????????????????????????????????????????????????????????????????????????????????????????????????????????????????????????????????????????????????????????????????????????????????????????????????????????????????????????????????????????????????????????????????????????????????????????????????????????????????????????????????????????????????????????????????????????????????????????????????????????????????????????????????????????????????????????????????????????????????????????????????????????????????????????????????????????????????????????????????????????????????????????????????????????????????????????????????????????????????????????????????????????????????????????????????????????????????????????????????????????????????????????????????????????????????????????????????????????????????????????????????????????????????????????????????????????????????????????????????????????????????????????????????????????????????????????????????????????????????????????????????????????????????????????????????????????????????????????????????????????????????????????????????????????????????????????????????????????????????????????????????????????????????????????????????????????????????????????????????????????????????????????????????????????????????????????????????????????????????????????????????????????????????????????????????????????????????????????????????????????????????????????????????????????????????????????????????????????????????????????????????????????????????????????????????????????????????????????????????????????????????????????????????????????????????????????????????????????????????????????????????????????????????????????????????????????????????????????????????????????????????????????????????????????????????????????????????????????????????????????????????????????????????????????????????????????????????????????????????????????????????????????????????????????????????????????????????????????????????????????????????????????????????????????????????????????????????????????????????????????????????????????????????????????????????????????????????????????????????????????????????????????????????????????????????????????????????????????????????????????????????????????????????????????????????????????????????????????????????????????????????????????????????????????????????????????????????????????????????????????????????????????????????????????????????????????????????????????????????????????????????????????????????????????????????????????????????????????????????????????????????????????????????????????????????????????????????????????????????????????????????????????????????????????????????????????????????????????????????????????????????????????????????????????????????????????????????????????????????????????????????????????????????????????????????????????????????????????????????????????????????????????????????????????????????????????????????????????????????????????????????????????????????????????????????????????????????????????????????????????????????????????????????????????????????????????????????????????????????????????????????????????????????????????????????????????????????????????????????????????????????????????????????????????????????????????????????????????????????????????????????????????????????????????????????????????????????????????????????????????????????????????????????????????????????????????????????????????????????????????????????????????????????????????????????????????????????????????????????????????????????????????????????????????????????????????????????????????????????????????????????????????????????????????????????????????????????????????????????????????????????????????????????????????????????????????????????????????????????????????????????????????????????????????????????????????????????????????????????????????????????????????????????????????????????????????????????????????????????????????????????????????????????????????????????????????????????????????????????????????????????????????????????????????????????????????????????????????????????????????????????????????????????????????????????????????????????????????????????????????????????????????????????????????????????????????????????????????????????????????????????????????????????????????????????????????????????????????????????????????????????????????????????????????????????????????????????????????????????????????????????????????????????????????????????????????????????????????????????????????????????????????????????????????????????????????????????????????????0021121002110?30000102100100301010110??12120323011101010110?11101110010?1?12?11120?0110020101511312002120?(1 2)102?0110?0121110101?????2????????10??102?11012?02111111????????010????1??????10111100100?????????

Devinophoca_sp ??????????????????????????????????????????????????????????????????????????????????????????????????????????????????????????????????????????????????????????????????????????????????????????????????????????????????????????????????????????????????????????????????????????????????????????????????????????????????????????????????????????????????????????????????????????????????????????????????????????????????????????????????????????????????????????????????????????????????????????????????????????????????????????????????????????????????????????????????????????????????????????????????????????????????????????????????????????????????????????????????????????????????????????????????????????????????????????????????????????????????????????????????????????????????????????????????????????????????????????????????????????????????????????????????????????????????????????????????????????????????????????????????????????????????????????????????????????????????????????????????????????????????????????????????????????????????????????????????????????????????????????????????????????????????????????????????????????????????????????????????????????????????????????????????????????????????????????????????????????????????????????????????????????????????????????????????????????????????????????????????????????????????????????????????????????????????????????????????????????????????????????????????????????????????????????????????????????????????????????????????????????????????????????????????????????????????????????????????????????????????????????????????????????????????????????????????????????????????????????????????????????????????????????????????????????????????????????????????????????????????????????????????????????????????????????????????????????????????????????????????????????????????????????????????????????????????????????????????????????????????????????????????????????????????????????????????????????????????????????????????????????????????????????????????????????????????????????????????????????????????????????????????????????????????????????????????????????????????????????????????????????????????????????????????????????????????????????????????????????????????????????????????????????????????????????????????????????????????????????????????????????????????????????????????????????????????????????????????????????????????????????????????????????????????????????????????????????????????????????????????????????????????????????????????????????????????????????????????????????????????????????????????????????????????????????????????????????????????????????????????????????????????????????????????????????????????????????????????????????????????????????????????????????????????????????????????????????????????????????????????????????????????????????????????????????????????????????????????????????????????????????????????????????????????????????????????????????????????????????????????????????????????????????????????????????????????????????????????????????????????????????????????????????????????????????????????????????????????????????????????????????????????????????????????????????????????????????????????????????????????????????????????????????????????????????????????????????????????????????????????????????????????????????????????????????????????????????????????????????????????????????????????????????????????????????????????????????????????????????????????????????????????????????????????????????????????????????????????????????????????????????????????????????????????????????????????????????????????????????????????????????????????????????????????????????????????????????????????????????????????????????????????????????????????????????????????????????????????????????????????????????????????????????????????????????????????????????????????????????????????????????????????????????????????????????????????????????????????????????????????????????????????????????????????????????????????????????????????????????????????????????????????????????????????????????????????????????????????????????????????????????????????????????????????????????????????????????????????????????????????????????????????????????????????????????????????????????????????????????????????????????????????????????????????????????????????????????????????????????????????????????????????????????????????????????????????????????????????????????????????????????????????????????????????????????????????????????????????????????????????????????????????????????????????????????????????????????????????????????????????????????????????????????????????????????????????????????????????????????????????????????????????????????????????????????????????????????????????????????????????????????????????????????????????????????????????????????????????????????????????????????????????????????????????????????????????????????????????????????????????????????????????????????????????????????????????????????????????????????????????????????????????????????????????????????????????????????????????????????????????????????????????????????????????????????????????????????????????????????????????????????????????????????????????????????????????????????????????????????????????????????????????????????????????????????????????????????????????????????????????????????????????????????????????????????????????????????????????????????????????????????????????????????????????????????????????????????????????????????????????????????????????????????????????????????????????????????????????????????????????????????????????????????????????????????????????0021120021100230?0010?111?1??1??00100???4000?1??121?2???010?11???????????????0100000??0000100201102002120012????1?000111???102?????2???????????????10001210???1???????20??112?1??1?1?10?2????0001???????????

Enaliarctos_barnesi ??????????????????????????????????????????????????????????????????????????????????????????????????????????????????????????????????????????????????????????????????????????????????????????????????????????????????????????????????????????????????????????????????????????????????????????????????????????????????????????????????????????????????????????????????????????????????????????????????????????????????????????????????????????????????????????????????????????????????????????????????????????????????????????????????????????????????????????????????????????????????????????????????????????????????????????????????????????????????????????????????????????????????????????????????????????????????????????????????????????????????????????????????????????????????????????????????????????????????????????????????????????????????????????????????????????????????????????????????????????????????????????????????????????????????????????????????????????????????????????????????????????????????????????????????????????????????????????????????????????????????????????????????????????????????????????????????????????????????????????????????????????????????????????????????????????????????????????????????????????????????????????????????????????????????????????????????????????????????????????????????????????????????????????????????????????????????????????????????????????????????????????????????????????????????????????????????????????????????????????????????????????????????????????????????????????????????????????????????????????????????????????????????????????????????????????????????????????????????????????????????????????????????????????????????????????????????????????????????????????????????????????????????????????????????????????????????????????????????????????????????????????????????????????????????????????????????????????????????????????????????????????????????????????????????????????????????????????????????????????????????????????????????????????????????????????????????????????????????????????????????????????????????????????????????????????????????????????????????????????????????????????????????????????????????????????????????????????????????????????????????????????????????????????????????????????????????????????????????????????????????????????????????????????????????????????????????????????????????????????????????????????????????????????????????????????????????????????????????????????????????????????????????????????????????????????????????????????????????????????????????????????????????????????????????????????????????????????????????????????????????????????????????????????????????????????????????????????????????????????????????????????????????????????????????????????????????????????????????????????????????????????????????????????????????????????????????????????????????????????????????????????????????????????????????????????????????????????????????????????????????????????????????????????????????????????????????????????????????????????????????????????????????????????????????????????????????????????????????????????????????????????????????????????????????????????????????????????????????????????????????????????????????????????????????????????????????????????????????????????????????????????????????????????????????????????????????????????????????????????????????????????????????????????????????????????????????????????????????????????????????????????????????????????????????????????????????????????????????????????????????????????????????????????????????????????????????????????????????????????????????????????????????????????????????????????????????????????????????????????????????????????????????????????????????????????????????????????????????????????????????????????????????????????????????????????????????????????????????????????????????????????????????????????????????????????????????????????????????????????????????????????????????????????????????????????????????????????????????????????????????????????????????????????????????????????????????????????????????????????????????????????????????????????????????????????????????????????????????????????????????????????????????????????????????????????????????????????????????????????????????????????????????????????????????????????????????????????????????????????????????????????????????????????????????????????????????????????????????????????????????????????????????????????????????????????????????????????????????????????????????????????????????????????????????????????????????????????????????????????????????????????????????????????????????????????????????????????????????????????????????????????????????????????????????????????????????????????????????????????????????????????????????????????????????????????????????????????????????????????????????????????????????????????????????????????????????????????????????????????????????????????????????????????????????????????????????????????????????????????????????????????????????????????????????????????????????????????????????????????????????????????????????????????????????????????????????????????????????????????????????????????????????????????????????????????????????????????????????????????????????????????????????????????????????????????????????????????????????????????????????????????????????????????????????????????????????????????????????????????????????????????????????????????????????????????????????????????????????????????????????????????????????????????????????????????????????????????????????????????????????????????????????????????????????????????????????002?1?0001011?31020?3?1??00?30????1??????????????1???????????????????????????010?00010000010071000201?0100011???11001011020?01?????2????????????????????????????????????????????????????????????????????????

Enaliarctos_emlongi ??????????????????????????????????????????????????????????????????????????????????????????????????????????????????????????????????????????????????????????????????????????????????????????????????????????????????????????????????????????????????????????????????????????????????????????????????????????????????????????????????????????????????????????????????????????????????????????????????????????????????????????????????????????????????????????????????????????????????????????????????????????????????????????????????????????????????????????????????????????????????????????????????????????????????????????????????????????????????????????????????????????????????????????????????????????????????????????????????????????????????????????????????????????????????????????????????????????????????????????????????????????????????????????????????????????????????????????????????????????????????????????????????????????????????????????????????????????????????????????????????????????????????????????????????????????????????????????????????????????????????????????????????????????????????????????????????????????????????????????????????????????????????????????????????????????????????????????????????????????????????????????????????????????????????????????????????????????????????????????????????????????????????????????????????????????????????????????????????????????????????????????????????????????????????????????????????????????????????????????????????????????????????????????????????????????????????????????????????????????????????????????????????????????????????????????????????????????????????????????????????????????????????????????????????????????????????????????????????????????????????????????????????????????????????????????????????????????????????????????????????????????????????????????????????????????????????????????????????????????????????????????????????????????????????????????????????????????????????????????????????????????????????????????????????????????????????????????????????????????????????????????????????????????????????????????????????????????????????????????????????????????????????????????????????????????????????????????????????????????????????????????????????????????????????????????????????????????????????????????????????????????????????????????????????????????????????????????????????????????????????????????????????????????????????????????????????????????????????????????????????????????????????????????????????????????????????????????????????????????????????????????????????????????????????????????????????????????????????????????????????????????????????????????????????????????????????????????????????????????????????????????????????????????????????????????????????????????????????????????????????????????????????????????????????????????????????????????????????????????????????????????????????????????????????????????????????????????????????????????????????????????????????????????????????????????????????????????????????????????????????????????????????????????????????????????????????????????????????????????????????????????????????????????????????????????????????????????????????????????????????????????????????????????????????????????????????????????????????????????????????????????????????????????????????????????????????????????????????????????????????????????????????????????????????????????????????????????????????????????????????????????????????????????????????????????????????????????????????????????????????????????????????????????????????????????????????????????????????????????????????????????????????????????????????????????????????????????????????????????????????????????????????????????????????????????????????????????????????????????????????????????????????????????????????????????????????????????????????????????????????????????????????????????????????????????????????????????????????????????????????????????????????????????????????????????????????????????????????????????????????????????????????????????????????????????????????????????????????????????????????????????????????????????????????????????????????????????????????????????????????????????????????????????????????????????????????????????????????????????????????????????????????????????????????????????????????????????????????????????????????????????????????????????????????????????????????????????????????????????????????????????????????????????????????????????????????????????????????????????????????????????????????????????????????????????????????????????????????????????????????????????????????????????????????????????????????????????????????????????????????????????????????????????????????????????????????????????????????????????????????????????????????????????????????????????????????????????????????????????????????????????????????????????????????????????????????????????????????????????????????????????????????????????????????????????????????????????????????????????????????????????????????????????????????????????????????????????????????????????????????????????????????????????????????????????????????????????????????????????????????????????????????????????????????????????????????????????????????????????????????????????????????????????????????????????????????????????????????????????????????????????????????????????????????????????????????????????????????????????????????????????????????????????????????????????????????????????????????????????????????????????????????????????????????????????????????????????????????????????????????????????????????????????????????????????????????00211?0000111?3000000?11?000300?1011????20103230211021?0100?1010100001001002101020001000001002101??????????112101?000011011?01?????2???????????????????????????????????????100100??11000????????????????????

Enaliarctos_mealsi ??????????????????????????????????????????????????????????????????????????????????????????????????????????????????????????????????????????????????????????????????????????????????????????????????????????????????????????????????????????????????????????????????????????????????????????????????????????????????????????????????????????????????????????????????????????????????????????????????????????????????????????????????????????????????????????????????????????????????????????????????????????????????????????????????????????????????????????????????????????????????????????????????????????????????????????????????????????????????????????????????????????????????????????????????????????????????????????????????????????????????????????????????????????????????????????????????????????????????????????????????????????????????????????????????????????????????????????????????????????????????????????????????????????????????????????????????????????????????????????????????????????????????????????????????????????????????????????????????????????????????????????????????????????????????????????????????????????????????????????????????????????????????????????????????????????????????????????????????????????????????????????????????????????????????????????????????????????????????????????????????????????????????????????????????????????????????????????????????????????????????????????????????????????????????????????????????????????????????????????????????????????????????????????????????????????????????????????????????????????????????????????????????????????????????????????????????????????????????????????????????????????????????????????????????????????????????????????????????????????????????????????????????????????????????????????????????????????????????????????????????????????????????????????????????????????????????????????????????????????????????????????????????????????????????????????????????????????????????????????????????????????????????????????????????????????????????????????????????????????????????????????????????????????????????????????????????????????????????????????????????????????????????????????????????????????????????????????????????????????????????????????????????????????????????????????????????????????????????????????????????????????????????????????????????????????????????????????????????????????????????????????????????????????????????????????????????????????????????????????????????????????????????????????????????????????????????????????????????????????????????????????????????????????????????????????????????????????????????????????????????????????????????????????????????????????????????????????????????????????????????????????????????????????????????????????????????????????????????????????????????????????????????????????????????????????????????????????????????????????????????????????????????????????????????????????????????????????????????????????????????????????????????????????????????????????????????????????????????????????????????????????????????????????????????????????????????????????????????????????????????????????????????????????????????????????????????????????????????????????????????????????????????????????????????????????????????????????????????????????????????????????????????????????????????????????????????????????????????????????????????????????????????????????????????????????????????????????????????????????????????????????????????????????????????????????????????????????????????????????????????????????????????????????????????????????????????????????????????????????????????????????????????????????????????????????????????????????????????????????????????????????????????????????????????????????????????????????????????????????????????????????????????????????????????????????????????????????????????????????????????????????????????????????????????????????????????????????????????????????????????????????????????????????????????????????????????????????????????????????????????????????????????????????????????????????????????????????????????????????????????????????????????????????????????????????????????????????????????????????????????????????????????????????????????????????????????????????????????????????????????????????????????????????????????????????????????????????????????????????????????????????????????????????????????????????????????????????????????????????????????????????????????????????????????????????????????????????????????????????????????????????????????????????????????????????????????????????????????????????????????????????????????????????????????????????????????????????????????????????????????????????????????????????????????????????????????????????????????????????????????????????????????????????????????????????????????????????????????????????????????????????????????????????????????????????????????????????????????????????????????????????????????????????????????????????????????????????????????????????????????????????????????????????????????????????????????????????????????????????????????????????????????????????????????????????????????????????????????????????????????????????????????????????????????????????????????????????????????????????????????????????????????????????????????????????????????????????????????????????????????????????????????????????????????????????????????????????????????????????????????????????????????????????????????????????????????????????????????????????????????????????????????????????????????????????????????????????????????????????????????????????????????????????????????????????????????00211?00?000??31030?0010?000300?101100012010313021002100010?10????0001?0?????0?????????0???007100020?21100011???1???00??01020????????????0???10010?11000?1021101010?1110?00100000111?0100?????001?0?????????

Enaliarctos_mitchelli ??????????????????????????????????????????????????????????????????????????????????????????????????????????????????????????????????????????????????????????????????????????????????????????????????????????????????????????????????????????????????????????????????????????????????????????????????????????????????????????????????????????????????????????????????????????????????????????????????????????????????????????????????????????????????????????????????????????????????????????????????????????????????????????????????????????????????????????????????????????????????????????????????????????????????????????????????????????????????????????????????????????????????????????????????????????????????????????????????????????????????????????????????????????????????????????????????????????????????????????????????????????????????????????????????????????????????????????????????????????????????????????????????????????????????????????????????????????????????????????????????????????????????????????????????????????????????????????????????????????????????????????????????????????????????????????????????????????????????????????????????????????????????????????????????????????????????????????????????????????????????????????????????????????????????????????????????????????????????????????????????????????????????????????????????????????????????????????????????????????????????????????????????????????????????????????????????????????????????????????????????????????????????????????????????????????????????????????????????????????????????????????????????????????????????????????????????????????????????????????????????????????????????????????????????????????????????????????????????????????????????????????????????????????????????????????????????????????????????????????????????????????????????????????????????????????????????????????????????????????????????????????????????????????????????????????????????????????????????????????????????????????????????????????????????????????????????????????????????????????????????????????????????????????????????????????????????????????????????????????????????????????????????????????????????????????????????????????????????????????????????????????????????????????????????????????????????????????????????????????????????????????????????????????????????????????????????????????????????????????????????????????????????????????????????????????????????????????????????????????????????????????????????????????????????????????????????????????????????????????????????????????????????????????????????????????????????????????????????????????????????????????????????????????????????????????????????????????????????????????????????????????????????????????????????????????????????????????????????????????????????????????????????????????????????????????????????????????????????????????????????????????????????????????????????????????????????????????????????????????????????????????????????????????????????????????????????????????????????????????????????????????????????????????????????????????????????????????????????????????????????????????????????????????????????????????????????????????????????????????????????????????????????????????????????????????????????????????????????????????????????????????????????????????????????????????????????????????????????????????????????????????????????????????????????????????????????????????????????????????????????????????????????????????????????????????????????????????????????????????????????????????????????????????????????????????????????????????????????????????????????????????????????????????????????????????????????????????????????????????????????????????????????????????????????????????????????????????????????????????????????????????????????????????????????????????????????????????????????????????????????????????????????????????????????????????????????????????????????????????????????????????????????????????????????????????????????????????????????????????????????????????????????????????????????????????????????????????????????????????????????????????????????????????????????????????????????????????????????????????????????????????????????????????????????????????????????????????????????????????????????????????????????????????????????????????????????????????????????????????????????????????????????????????????????????????????????????????????????????????????????????????????????????????????????????????????????????????????????????????????????????????????????????????????????????????????????????????????????????????????????????????????????????????????????????????????????????????????????????????????????????????????????????????????????????????????????????????????????????????????????????????????????????????????????????????????????????????????????????????????????????????????????????????????????????????????????????????????????????????????????????????????????????????????????????????????????????????????????????????????????????????????????????????????????????????????????????????????????????????????????????????????????????????????????????????????????????????????????????????????????????????????????????????????????????????????????????????????????????????????????????????????????????????????????????????????????????????????????????????????????????????????????????????????????????????????????????????????????????????????????????????????????????????????????????????????????????????????????????????????????????????????????????????????????????????????????????????????????????????????????????????????????????????????????????????????????00211?0000011?31030?03????0?300?1011???????0?23011002??0010?11?0?1???????1?????????????0000002101120121000111???1???????????????????????????????????????????????????????????????????????????????????????????

Enaliarctos_tedfordi ??????????????????????????????????????????????????????????????????????????????????????????????????????????????????????????????????????????????????????????????????????????????????????????????????????????????????????????????????????????????????????????????????????????????????????????????????????????????????????????????????????????????????????????????????????????????????????????????????????????????????????????????????????????????????????????????????????????????????????????????????????????????????????????????????????????????????????????????????????????????????????????????????????????????????????????????????????????????????????????????????????????????????????????????????????????????????????????????????????????????????????????????????????????????????????????????????????????????????????????????????????????????????????????????????????????????????????????????????????????????????????????????????????????????????????????????????????????????????????????????????????????????????????????????????????????????????????????????????????????????????????????????????????????????????????????????????????????????????????????????????????????????????????????????????????????????????????????????????????????????????????????????????????????????????????????????????????????????????????????????????????????????????????????????????????????????????????????????????????????????????????????????????????????????????????????????????????????????????????????????????????????????????????????????????????????????????????????????????????????????????????????????????????????????????????????????????????????????????????????????????????????????????????????????????????????????????????????????????????????????????????????????????????????????????????????????????????????????????????????????????????????????????????????????????????????????????????????????????????????????????????????????????????????????????????????????????????????????????????????????????????????????????????????????????????????????????????????????????????????????????????????????????????????????????????????????????????????????????????????????????????????????????????????????????????????????????????????????????????????????????????????????????????????????????????????????????????????????????????????????????????????????????????????????????????????????????????????????????????????????????????????????????????????????????????????????????????????????????????????????????????????????????????????????????????????????????????????????????????????????????????????????????????????????????????????????????????????????????????????????????????????????????????????????????????????????????????????????????????????????????????????????????????????????????????????????????????????????????????????????????????????????????????????????????????????????????????????????????????????????????????????????????????????????????????????????????????????????????????????????????????????????????????????????????????????????????????????????????????????????????????????????????????????????????????????????????????????????????????????????????????????????????????????????????????????????????????????????????????????????????????????????????????????????????????????????????????????????????????????????????????????????????????????????????????????????????????????????????????????????????????????????????????????????????????????????????????????????????????????????????????????????????????????????????????????????????????????????????????????????????????????????????????????????????????????????????????????????????????????????????????????????????????????????????????????????????????????????????????????????????????????????????????????????????????????????????????????????????????????????????????????????????????????????????????????????????????????????????????????????????????????????????????????????????????????????????????????????????????????????????????????????????????????????????????????????????????????????????????????????????????????????????????????????????????????????????????????????????????????????????????????????????????????????????????????????????????????????????????????????????????????????????????????????????????????????????????????????????????????????????????????????????????????????????????????????????????????????????????????????????????????????????????????????????????????????????????????????????????????????????????????????????????????????????????????????????????????????????????????????????????????????????????????????????????????????????????????????????????????????????????????????????????????????????????????????????????????????????????????????????????????????????????????????????????????????????????????????????????????????????????????????????????????????????????????????????????????????????????????????????????????????????????????????????????????????????????????????????????????????????????????????????????????????????????????????????????????????????????????????????????????????????????????????????????????????????????????????????????????????????????????????????????????????????????????????????????????????????????????????????????????????????????????????????????????????????????????????????????????????????????????????????????????????????????????????????????????????????????????????????????????????????????????????????????????????????????????????????????????????????????????????????????????????????????????????????????????????????????????????????????????????????????????????????????????????????????????????????????????????????????????????????????????????????????????????????002?1?00?0111?300?0?3?10?00?300?1111????2010?230?1002???1?0?0?????0001????021???????????000002101?????????111???1???????????????????????????????????????????????????????????????????????????????????????????

Enhydra_lutris TGGTGCCCCCCACGGAAGGCCCCGTCAGCTCTCCCACTCCGTACGTGGAGGACACCCCCGAGCCGCCCCTCCACGACTTCTACTGCAGCCGGCTTCTGGACCTGGTTTTCCTGCTAGACGGCTCCTCTAAGCTGTCTGAGGGCGAGTTCCAAGTGCTGAAGGTCTTTGTGGTGGGCATGATGGAGCGTCTGCACATCTCCCAGAAGCGCATCCGCGTGGCCGTGGTAGAGTACCACGACGGCTCCCATGCCTACATCGAGCTCCAGGACCGGAAGCGGCCCTCAGAGCTGCGGCGCATCGCCAGCCAAGTGAGGTACGTGGGCAGCGAGGTGGCCTCCACCAGTGAGGTCCTCAAGTACACGCTGTTCCAGATCTTCGGCAAGATCGACCGTCCTGAAGCATCCCGCATCGCTCTGCTCCTCACGGCCAGCCAGCAGCCTCCGAAGCTGGCCCGCAATCTGGTCCGCTACGTGCAGGGCCTGAAGAAGAAGAAAGTCATCGTGATCCCCGTGGGCATCGGGCCCCACGTCAACCTCAAGCAGATCCACAACATCGAGAAGCAGGCCCCCGAGAACAAGGCCTTTGTGCTCAGCGGTGTGGATGAGCTGGAGCAGCGGAGGGATGAGATTATCAGCTACCTGTGTGACCTGGCCCCCGAAGCACCCCACCTTACCCAGCAGCCCCCTGTGTTGCCGGTCACTCTGGGTCCGGAGATTTTGGGGGTCCCATCGTCGGGACCCAGAAGGAACTCCATGGTTCTGGATGTGGTGTTCATCCTGGAAGGCTCAGACAAAATTGGAGAGGCCAACTTCAACAAGAGCAGGGACTTCATGGAGGAGGTGATCCAGCGGATGGACGTGAGCCAGGATGGCGTCCATGTCACGGTGCTGCAGTACTCCTACGCCGTGGCCGTGGAGTACACCTTCAGCGAGGCCCAGTCCAAGGGTGAGGTCCTGCAGCACGTGCGGGAGATCCGATTCCGGGGCGGCAACAGGACCAACACTGGGCTGGCCCTGCAGTACCTGTCTGAGCACAGCTTCTCCGTCAGCCAGGGGGACCGGGAGCAGGTCCCTAACCTGGTCTACATGGTCACGGGAAACCCTGCCTCTGATGAGATCAAGCGGATGCCTGGAGACATCCAGGTGGTGCCCATCGGAGTGGGTCCTCATGCCGACCCACAGGAGCTGGAAATAAAGACAGAATGAATGTAGAAAAGGCTGAATTCTGTAATAAAAGCAAACAGCCTTCCTTAGCAAGGAGCCAACAGAGCAGATGGGCCGAAAGTAAGGAAACATGTAATGATAGGCAGACTCCCAGCACAGAGAGAAAGGTACTTCTGAAAGCCGATCCCCTGCGTGGGAGAAGAGAACCGAAGAAGCAGAAACCTCTACGCTCTGACAGTCCTAGAGATTCCCAAGATGTTCCTTGGATAACACTGAATAGTAGCATACAGAAAGTGAATGAGTGGTTTTCCAGAAGCGATGAAATGTTAACTTCCGATGATGACTCACATGACGGGGGATCTGAATCGAAGACCGAAGTAGCTGGTGCAGTAGAAGTTCCAAATGAAGTGCACATATGCTCTGGTTCCTCTGAGAAAATAGACTTAATGGCCAGCGAGCCTCAGGATGCTCTGATACGTGAACGGGAAAGAGTCCACACCAAGTCAGTAGAGAGTAACATCGAAGATAAAATATTTGGGAAAACCTACCGGAGGAAGGCAAGCCTCCTTAACGTGAGCCACACGAGCGAAGATCTGCTTATAGGAGCGTGTGCTGTAGAACCTCAGACAGCGCAAGCTCATCCCCTCACGAGTAAAGCAAAGCGTAAAAGGAGAACTACAGCAGGCCTTCGTCCTGAGGATTTTATCAAGAAAGTAGATCTGGCCGTCGTTCCAAAGACTCCCGAAAAGCTAGTTGAGGGAACTGACCAACTCGAGCGAAGTGGTCACGTGACGAAGATTAGAAATAATAGTCCGGAGGATGAAATAAAAGGTGATTATGTTCAGACCGAGAAAAATGCTAACCCAACAGAATCCCTGGAAAAAGATTCTGCTTTCCGAAGCAGAGCTGAACCGATAAGCAGCAGTATAAGCAAGATGGAACTGGAATTAAATAGCTCCGGTTCAAAAGCCCTTAAGAAGAACAGGCTGCGGAGGAAGTCCTCCACCAGGCACGGCTGTGCGCTTGAATTCGTAGTCAGTCAAAATCCAAGCCCACCTGATCGCAACGAACTGCAGAACCATCAGAATTTCTCTGCTGGAAACAATGAGAACAGCATTGAGGCCCACATAGGAATAAATGGAGAAGCCAACCTGGATTTCCTCAACATTCCTTTGACGATTCCTGAAATGACTCTACCTTACACAACACTCACAACTCCCCAGGTGAAAGATTTCTCCCTTTGGGAAAAAACAGGCTTGAAGGATTTCTTGAAGACAACAAAGCAATCATTTGATTTAAGTGTAAAGGCTCAGTATAAGAAAAACAAAGACGAGCACATCATCCCAATTCCCTTTTATGCAAAAGATTTCCAGGTACTGAGTACCCCAAATGATATTTTCATCCCAGCTATGGGCAATATTACCTATGACTTTTCCTTTAAGTCAGGCATCATCACGCTGAATACCAATGTTGGACTGTATAACCAGTCAGATATTGTTGCTTATTTCCTAACTTCCTCTTCTTCTGTCACTGATGCTCTGCAGTACAAATTAGAGGGCACCTCAAGTTTGACGAGGAAAAGAGGCTTGAAGCTAGCCACAGCTTTGTCTCTGAGTAATAAATTTGTGGAAGGAAATCATGACAGTACTTTTAGTTTGACCAAGAAAAACATGGAGGCATCAGTGACAACATCTGCAGAAGTCCAAATTCCTATTTTGAGAATGAAATTCAAGCAAGAACTTAATGGAAATACCAAGTCAAAGCCTACTGTCTCTTCATCCATTGAATTAATGTATGATCTCAAT---------------TCTACTGCTACAGGAACAATCAACCACAAACTCAACTTAGAGAGCCTCACCTCTTACTTTTACATTGAGTCATCTACCAAAGGAGATATCAAGGGCTCAGTACTTTCAATAGAATATTCAGGAACTATTGCCAGCGAAGCCAGCACTTACTTGAATTCCAAGACTACTCGGTCTTCAGTGAAGCTGCAAGGGGCTTCCAAAGTTGATGGTATCTGGAACCTATGAGAGCCCAAGACCTTGATGACTACCTCAACGGCCCCTTCACCGTCGTGGTGAAGGAGTCTTGCGATGGAATGGGAGACGTGAGCGAGAAGCATGGGAGCGGGCCCGTGGTTCCAGAAAAGGCCGTTCGGTTTTCTTTCACGGTCATGAAAATTACAATAGCACGTGGCTCCGAACATGTGAAGGTGTTTGAAGAAGTCAAACCCAATTCTGAACTGTGCTGTAAGCCCCTGTGTCTCATGCTGGCAGATGAGTCTGACCACGAGACCCTGACGGCCATCCTGAGCCCTCTCATTGCTGAGAGGGAGGCCATGAAGAGCAGCCAATTAATGCTTGAGATGGGAGGCATCCTTCGGAGTTTCAAGTTCATCTTCAGGGGCACCGGCTACGATGAGAAACTCGTCCGGGAAGTCGAAGGCCTCGAGGCTTCTGGCTCAGTCTACATTTGTACCCTTTGTGACGCCACCCGCCTAGAAGCGTCTCAAAATCTCGTCTTCCACTCCATCACCAGAAGCCACTCCGAGAACCTGGAGCGCTATGAGGTCTGGCGTTCTAACCCGTACCACGAGTCGGTGGAAGAGCTGCGGGACCGGGTGAAAGGGGTGTCATCGAAACCTTTCATCGAGACGGTCCCTTCCATAGATGCGCTCCACTGTGACATTGGCAATGCAGCCGAGTTCTACAAGATTTTCCAGCTAGAGATAGGGGAGGTGTACAAGAATCCCAATGCCTCCAAAGAGGAAAGGAAGAGATGGCAGGCTACGTTGGACAAGCATCTCCGGAAGAAGATGAACCTGAAACCGATCATGAGGATGAACGGCAACTTTGCCAGGAAGCTCATGACCCAAGAGACCGTGGAAGCAGTCTGTGAGTTAATTCCCTCTGAGGAGAGGCATGAAGCTCTGAGGGAGCTGATGGACCTTTACCTTAAGATGAAGCCGGTGTGGCGATCATCGTGTCCTGCCAAAGAGTGCCCAGAATCTCTCTGCCAGTATAGCTTCAATTCACAGCGTTTTGCTGAGCTCCTCTCTACCAAGTTCAAGTATAGATATGAGGGCAAAATCACCAATTATTTTCACAAAACCCTGGCACA????GCCCATGTGCTGACCACCGGGGTGCAGAGCTCCTTGAATGACCCTCGCCTGGTCATCTCCTATGAGCCCAGCACCCTCCAGGCTCCCCGGCAAGCTTCAGCCCTCACCAACCTCACCCAAGAGGAACTGCTTGCCCGCTTGCAGAAGGGCATCCACCACGAGGTTCTGGAGGGCAACGTGGGCTACTTGCGTGTGGATGACATCCCAGGCCAGGAGGTGGTGAGCAAGCTGGGGGGCTTCCTGGTGGCCAGCGTCTGGAGGAAGCTCATGGGCACCTCTGCCTTGGTGCTGGACCTCCGACACTGCACTGGGGGCCACATTTCTGGTATCCCCTACTTCATCTCCTACCTGCACCCAGGGAACACAGTCCTGCACGTGGATACCATCTACGACCGCCCCTCCAATACAACCACTGAGATCTGGACCTTGCCCCAGGTCCTGGGAGAAAGGTACAGTGCGGACAAGGATGTGGTGGTCCTCACCAGCGGCCACACGGGGGGTGTGGCTGAGGACATCACTTACATCCTCAAACAGATGCGCAGAGCCATTGTGGTGGGCGAGCGGACTGGAGGGGGTGCCCTGGACCTCCAGAAGATAAGGATAGGCCAGTCCGACTTCTTCCTCACCGTGCCCGTGTCCAGGTCTCTAGGGCCCTTGGGAAGAGGCAGCCAGACCTGGGAGGGCAGCGGGATACTGCCCTGTGTGGGGACACCAGCGGAGCAGGCCCTAGAGAAAGCCCTGGCCATCCTCACTTTGCGCCGGGCCCTGCCTGGAGTTGTGCGGCGCCTGCAGGGGGCGCTCCAGACCTACTACACACTAGTAGAACGCGTGCCCGCTCTGCTGCACCACCTGGCCAATATGGACTTCTCTGCAGTGGTCTCTGAGGAGGACCTGGTCGCGAAGCTCAACGCAGGTCTGCAGACTGCGTCCGAGGACCCCAGGCTCCTGGTGCGGGCCGTCAGTCCCAAGGAAACCTCTTCTGGGCCCGAGGTTGGAGAGGACGACCCTCCGGAGGTGGTCCCCACGGTGCCCGACAATGAGGCTGCCCGGCGAGCCCTAGTGGGCGCTATGTTCCAGGTGTCCGTGCTGCCCGGCAACGTGGGCTACCTCCGCTTTGACACCTTTGCCAACGCCTCGGTGCTGGAGGCGCTGAACCCCTACATCGTACGTCAGGTGTGGGGGCCCCTG000?1000?0110?31000?(0 3)?10?230210010001000?00?01000110201?000011000000000000?000101000000100001320221112110202????11?010020002?11??132011200000?011000011100?200?00?0?00000000?0?00??1?000?1100000100?00100200

Erignathus_barbatus ????????????????????????????????????????????????????????????????????????????????????????????????????????????????????????????????????????????????????????????????????????????????????????????????????????????????????????????????????????????????????????????????????????????????????????????????????????????????????????????????????????????????????????????????????????????????????????????????????????????????????????????????????????????????????????????????????????????????????????????????????????????????????????????????????????????????????????????????????????????????????????????????????????????????????????????????????????????????????????????????????????????????????????????????????????????????????????????????????????????????????????????????????????????????????????????????????????????????????????????????????????????????????????????????????????????????????????????????????????????????????????????????????????????????????????????????????????????????????????????????????????????????????????????????????????????????????????????????????????????????????????????????????????????????????????????????????????????????????????????????????????????????????????????????????????????????????????????????????????????????????????????????????????????????????????????????????????????????????????????????????????????????????????????????????????????????????????????????????????????????????????????????????????????????????????????????????????????????????????????????????????????????????????????????????????????????????????????????????????????????????????????????????????????????????????????????????????????????????????????????????????????????????????????????????????????????????????????????????????????????????????????????????????????????????????????????????????????????????????????????????????????????????????????????????????????????????????????????????????????????????????????????????????????????????????????????????????????????????????????????????????????????????????????????????????????????????????????????????????????????????????????????????????????????????????????????????????????????????????????????????????????????????????????????????????????????????????????????????????????????????????????????????????????????????????????????????????????????????????????????-----------TTCTCTGCTGGAAACAATGAGAACAGCACTGAGGCCCACATAGGAATAAATGGAGAAGCTAACCTGGATTTCCTCAACATTCCTTTGACAATTCCTGAAATGACTGTACCGTACACAATGCTCACAACTCCCCAGGTGAAAGATTTCTCCTTGTGGGAGAAAACAGGCTTGAAGGATTTCTTGAAGACAACAAAGCAATCATTTGATTTAAGTGTAAAGGCCCAGTATAAGAAAAACAAAGACAAGCATATCATCCCAATTCCTATTTATGCAAAAGATTTCCAGGTATTGAGTACCCCAAATGATATTTTCATTCCAGCCATGGGCAATGTTACCTATGACTTTTCTTTTAAATCAGGTGTCATCACGCTGAATACCAATGTTGGACTGTATAACCAGTCAGATATTGTTGCTCATTTCCTAACTTCCTCTTCTTCTGTTACTGATGCACTGCAGTACAAATTAGAGGGCACCTCAAGTTTGACGAGGAAAAGAGGCTTGAAGCTAGCCACAGCTTTGTCTCTGACTAACAAATTCGTGGAAGGCAATCATGACAGTACTATTAGTTTGACCAGGAAAAACATGGAGGCATCAGTGACAACATCTGCAAAAGTCCAAATTCCCATTTTGAGAATGAATTTCAAGCAAGAACTTAATGGAAATACCAAGTCGAAGCCTACTGTCTCTTCATCCATTGAATTAACGTATGATCTCAATTCCCCTGAACTGTACTCTACTGCAACAGGGACAGTCAACCACAAACTCAACTTAGAGAGCCTCACCTCTTACTTTTCCATTGAGTCATCTACCAAAGGGGATATCAAGGGTTCAGTACTTTCAAGGGAATATTCAGGAACTATTGCCAGTGAGGCCAGCACTTACTTGAATTCCAAGAGTACTCGGTCTTCAGTGAAGCTGCAAGGGGCTTCCAAAGTTGATG???CCTGGAAGGCATGAGAGCCCAAGACCTTGATGACTACCTGAATGGCCCCTTCACTGTCGTGGTGAAGGAGTCTTGTGATGGAATGGGAGATGTGAGCGAGAAGCACGGGAGTGGGCCGGCAGTTCCAGAAAAGGCAGTTCGGTTTTCGTTCACGGTCATGAAAATTACTGTAGCCCATGGCTCAGAAAACGTGAAGGTGTTTGAAGAAGTCAAACCCAACTCCGAACTGTGTTGTAAGCCCCTGTGTCTCATGCTGGCAGATGAGTCTGACCACGAGACCCTGACGGCCATCCTGAGCCCTCTCATTGCCGAGAGGGAGGCCATGAAGAGCAGCCAATTAATGCTTGAGATGGGAGGCATCCTTCGGACTTTCAAGTTCATCTTCAGGGGCACTGGATATGATGAGAAACTCGTCCGGGAAGTCGAAGGCCTTGAGGCTTCTGGCTCAGTCTACATTTGTACCCTTTGTGACGCCACCCGCCTGGAAGCCTCTCAGAATCTTGTCTTCCACTCCATCACCAGAAGCCACTCTGAGAACCTGGAGCGCTATGAGGTCTGGCGTTCCAACCCATACCACGAGTCGGTGGAAGAACTGCGGGATCGGGTGAAAGGGGTCTCATCGAAACCTTTCATCGAGACTGTCCCTTCCATAGATGCACTCCACTGTGACATTGGCAATGCGGCTGAGTTCTACAAGATTTTCCAGCTAGAGATAGGGGAGGTGTATAAGAATCCCAATGCTTCCAAAGAGGAAAGGAAAAGATGGCAGGCTACATTGGACAAGCATCTCCGGAAGAAGATGAACCTGAAACCCATCATGAGGATGAATGGCAACTTTGCCCGGAAGCTCATGGCCCAAGAGACAGTTGAAGCAGTTTGTGAATTAATTCCCTCTGAGGAGAGGCACGAAGCTCTGAGGGAGCTGATGGACCTTTACCTGAAGATGAAGCCTGTCTGGCGATCATCATGTCCTGCGAAAGAGTGCCCAGAATCCCTCTGCCAGTATAGCTTCAATTCACAGCGTTTTGCTGAGCTCCTCTCTACCAAGTTCAAGTATAGATATGAGGGCAAAATCACCAATTATTTTCACAAAACCCTGGCACACGTCGCCCATGTGCTGACCACGGGGGTGCAGAGCTCCTTGAACGACCCTCGCCTGGTCATCTCATATGAGCCCAGCACCCTTGAGGCTCCCCGGCAAACCCCAGCACTCACCAACCTCACACAAGAGGAACAGCTTGCCCRGTTGCAGAAGGGCATCCGCCACGAGGTTCTGGAGGGCAACGTGGGCTACCTGCGTATGGACGACATCCCAGGCCAGGAGGTGGTGAGCAAGCTGGGGGGCTTCCTGGTGACCAGCGTCTGGAGGAAGCTCATGGGCACCTCTGCCTTGGTGCTGGACCTCCGGCACTGCACTGGGGGCCATATTTCCGGCATCCCCTACGTCATCTCCTACCTACACCCAGGGAACACAGTCCTGCACGTGGATACCATCTACAACCGCCCCTCCAATACAACCACTGAGATCTGGACCCTGCCCCAGGTCCTAGGAGAAAGGTACAGTGCCGACAAGGATGTGGTGGTCCTCACCAGCGGCCACACGGGGGGCGTGGCTGAGGACATCACTTACATCCTCAAACAGATGCGCAGGGCCATCGTGGTGGGTGAGCGGACTGTGGGGGGTGCCCTGGACCTCCAGAAGCTGCGGATAGGCCAGTCCGACTTCTTCCTCACTGTGCCCGTGTCCAGGTCCCTAGGGCCCCTGGGAGGAGGCAGCCAGACATGGGAGGGCAGCGGGGTGCTGCCCTGTGTGGGGACACCAGCAGAGCAGGCGCTCGAGAAAGCCCTGGCCATCCTCACTCTGCGCCGGGCCCTGCCAGGTGTCGTGCAGCGCCTGCAGGAGGCACTGCAGGCCTACTACACGCTGGTGGACCGCGTGCCCACCCTGCTGCACCACCTGGCCAACATGGACTTCTCTGCGGTGGTCTCCGAGGAGGACCTGGTCACGAAGCTCAACGCTGGTCTACAGACTGCGTCTGAGGACCCCAGGCTCCTGGTGCGGGCCGTCAGGCCCAAGGAAACATTTTCTGGGCCTGAGGTCGGAGACGATGACCCTCCGGAGGTGGTCCCCACAGTGGCCGAGGATGAGGCTGTCCGGCGGGGCCTGGTGGACTCTATGTTCCAGGTGTCCGTGCTGCCGGGCAACGTGGGCTACCTCCGCTTTGACAGCTTTGCCGACGCCTCGGTGCTGGAGGTGCTGAGCCCATACATCGTGCACCAGGTGTGGGA???????1020120021100331100(0 1)22101110?13112100?0?4000?2010301201002002112221011111222111120000100000015022120?2120112????11?000002?0102?????20002111111000001001121022111010001201111212?1031010020111000111010110301

Eumetopias_jubatus TGGTGCCCCCCACGGAAGGCCCCGTTGCCTCCACCACCCCGTATGTGGAGGACACCCCGGAGCCACCTCTCCATGACTTCTACTGCAGCAAGCTTCTGGACCTGGTTTTCCTGCTAGATGGCTCCTCCAAGCTGTCTGAGGGCGAGTTTGAAGTGCTGAAAGTCTTTGTGGTGGGCATGATGGAGCGTCTGCACATCTCCCAGAAGCGGATCCGCGTGGCCATGGTGGAGTACCACGATGGCTCCCATGCCTACATCGAGCTCAAGGACCGGAAGCGACCCTCTGAGCTGCGGCGCATCGCCAGCCAGGTGAAGTACGTGGGCAGCGAGGTGGCCTCCACCAGCGAGGTCTTGAAGTACACACTGTTCCAGATCTTCGGCAAGATCGACCGCCCCGAAGCGTCCCGCATCGCCCTGATCCTCATGGCCAGCCAGGAGCCCCCGAGGCTGGCCCGGAATTTGATCCGCTATGTGCAGGGCCTGAAGAAGAAGAAAGTCATTGTGATCCCCGTGGGCATCGGGCCCCACGCCAACCTCAAGCAGATCCGAAACATCGAGAAGCAGGCCCCCGAGAACAAGGCCTTTGTGCTCAGTGGTGTGGACGAGCTGGAGCAGCGAAGAGATGAGATTATCAGCTACCTCTGTGACCTTGCCCCGGAAGCACCTGCCCCTACTCAGCACCCCCCTATGGTTCCGGTCACTGTGGGTCCAGAGCTCTTGGGGGTTCCATCATCGGGACCCAAAAGGAACTCCATGGTTCTGGATGTGGTGTTTGTCCTGGAAGGGTCAGACAAAATTGGTGAGGCCAACTTTAACAAGAGCAGGGAGTTCATGGAGGAGGTGATTCAGCGGATGGACGTGGGCCAGGACAGCATCCACGTCACGGTGCTGCAGTACTCCTACACGGTGGCTGTGGAGTACACCTTCAGTGAGGCCCAGTCCAAGGGGGAGGTCCTGCAGCACGTGCGGGAGATCCGATACCGGGGCGGCAACAGGACCAACACCGGGCTGGCCCTGCAGTACCTGTCTGAACACAGCTTCTCTGTCAGCCAGGGGGATCGGGAGCAGGTCCCTAACCTGGTCTACATGGTCACAGGAAACCCCGCCTCTGATGAGATCAAGCGGATGCCTGGAGACATCCAGGTGGTGCCCATTGGAGTGGGCCCTCACGCCGATGTGCAGGAGCTGCAGATAAAGACAGAATGAATGTAGAGAAGGCTGAATTCTGTAATAAAAACAAACAGCCTGGCTTAGCAAGGAGCCAACAAAGCAGATGGGCTGAAAGTAAGGAAACACGTAATGATAGGCAGACTCCCAGCACAGAGAAAAAGGTACTTCTGAATGCTGATCCCCTGTGTGGGAGAAAAGAACTGAAGAAACAGAAACCTCCATGCTCTGACAGTCCTAGAGATTCCCAAGATGTTCCTTGGATAACACTGAATAGTAGCATACAGAAAGTTAATGAGTGGTTTTCCAGAAGTGATGAAATGTTAACTTCC---GATGACTCACATGACGGGGAATCTGAATCGAATACTGAAGTAGCTGGTGCAATAGAAGTTCCAAATGAAGTGGACGGATATTCTGTTTCTTCTGAGAAAATAGACTTAATGGCCAGTGATCCTCAGGATGCTTTGATATGTGAAAGTGAAAGAATCCACACCAAGTCAGTAGAGAGTAATATCGAAGATAAAATATTTGGGAAAACCTATCGGAGGAAGGCAAGCCTCCCTAACGTGAGCCACACGAATGAAGATCTTATTATAGGAGCATGTCCTATAGAACCTCAGACAGCGCGAGCCCATCCCCTCACGAATAAAGCAAAGCGTAAAAGGAGAACTACATCAGGCCTTCATCCTGAGGATTTTATCAAGAAAGTAGATTTGGCCATTGTTCCAAAGACTCCTGAAGAGCTAGTTGAGGGAACCGACCAAATCGAGCGAAATGGTCATGTGATGAATATTACAAATAATGGTCCTGAGAATGAAACAAAAGGTGATTATGTTCAGAATGAGAAAAATGCTAACCCAACAGAATCATTGGAAAAAGAATCTGCTTTTAGAAGCAAACCTGAACCGATAAGCAGCAGTATAATCACTATGGAACTGGAATTAAATAGCTCCAGTTCGAAAGCCCCTAAGAAGAACAGGCTGAGGAGGAAGTCCTCCACCAGGCACGCTTGTGCGCTTGAATTCGTAGTTAGTGGAAATCCAAGCCCACTTGATCATAGCGAACTACAGAACCATCAGAGTTTCTCTGCTGGAAACAATGAGAATAGCATTGAGGCCCACATAGGAATAAATGGAGAAGCCAACCTGGATTTCCTCAACATTCCTTTGACAATTCCTGAAATGACTCTACCTTACACAATGCTCACAACTCCCCAGGTGAAAGATTTCTCCTTGTGGGAAAAAACAGGCTTGAAGGATTTCTTGAAGACAACAAAGCAATCACTTGATTTAAGTGTAAAGGCCCAGTATAAGAAAAATAAAGACAAGCATATCATCCCAGTTCCTTTTTATGCAAAAGATTTCCAGGTATTGAGTACCCCAAATGATATTTACATTCCAGCCATGGGCAATGTTACCTATGACTTTTCTTTTAAATCAGGCGTCGTCACCCTGAATACCAATGTTGGACTGTATAACCAGTCAGATATTGTTGCTCACTTCCTAAGTTCCTCTTCTTCTGTTACTGATGCACTGCAGTACAAATTAGAGGGCACCTCAAGTCTGACAAGGAAAAGAGGCTTGAAGCTAGCCACAGCTTTGTCTCTGACTAATAAATTCGTGGAAGGCAATCATGACAATACCATTAGTTTGACCAAGAAAAACATGGAGGCATCAGTGACAACATCTGCAAAAGTCCAAATTCCCATTTTGAGAATGAATTTCAAGCAAGAACTTAATGGAAATACCAAGTCGAAGCCTACTGTCTCTTCATCCATTGAATTAACGTATGATCTCAATTCCCCTGAACTGTACTCTACTGCCACAGGGACAGTCAAACACAAACTCAACTTAGAGAGCCTCACCTCTTACTTTTCCATTGAGTCATCTACCAAAGGGGATATCAAGGGTTCAGTACTTTCAAGGGAATATTCAGGAACTATTGCCAGTGAGGCCAGCACTTACTTGAATTCCAAGAGTACTCGGTCTTCAGTGAAGCTGCAAGGGGCTTCCAAAGTTGATGGTATCTGGAACCCATGAGAGCCCAAGACCTTGATGACTACCTGAATGGCCCCTTCACCGTCGTGGTGAAGGAGTCTTGTGACGGAATGGGAGATGTGAGCGAGAAGCACGGGAGCGGGCCAGCAGTTCCAGAAAAGGCAGTTCGGTTTTCGTTCACGGTCATGAAAATTACTGTAGCCCATGGCTCAGAAAATGTGAAGGTGTTTGAAGAAGTCAAACCCAACTCTGAACTGTGTTGTAAGCCCCTGTGTCTCATGCTGGCAGATGAGTCTGACCACGAGACCCTGACGGCCATCCTGAGTCCTCTCATTGCCGAGAGGGAGGCCATGAAGAGCAGCCAATTAATGCTTGAGATGGGAGGCATCCTTCGGACTTTCAAGTTCATCTTCAGGGGCACCGGATATGATGAGAAACTCATCCGGGAAGTCGAAGGCCTCGAGGCTTCTGGCTCAGTCTACATTTGTACCCTTTGTGACACCACCCGCCTAGAAGCCTCTCAAAATCTTGTCTTCCACTCCATCACCAGAAGCCACTCTGAGAACCTGGAGCGCTATGAGGTCTGGCGTTCCAACCCATACCACGAGTCAGTGGAAGAACTGCGGGATCGGGTGAAAGGGGTCTCATCGAAACCTTTCATCGAGACTGTCCCTTCCATAGATGCACTCCACTGTGACATTGGCAACGCAGCTGAGTTCTACAAGATTTTCCAGCTAGAGATAGGGGAGGTGTATAGGAATCCCAATGCTTCCAAAGAGGAAAGGAAAAGATGGCAGGCTACATTGGACAAGCATCTCCGGAAGAAGATGAACCTGAAACCCATCATGAGGATGAATGGCAACTTTGCCAGGAAGCTCATGACCAAAGAGACAGTTGAAGCAGTTTGTGAATTAATTCCCTCTGAGGAGAGGCATGAAGCTCTGAGGGAGCTGATGGACCTTTACCTGAAGATGAAGCCTGTATGGCGATCAACGTGTCCCGCAAAAGAGTGCCCAGAATCCCTCTGCCAGTATAGCTTCAATTCACAGCGTTTTGCTGAGCTCCTTTCTACCAAGTTCAAGTATAGATATGAGGGCAAAATCACCAATTATTTTCACAAAACCCTGGCACACGTCGCCCATGTGCTGACCACCGGGGTGCAGAGCTCCTTGAACGACCCTCGCCTGGTCATCTCATATGAGCCCAGCACTCTTGAGGCTCCCCGGCAAGCCCCAGCACTCACCAACCTCACACAAGAGGAACAGCTTGCCCGGTTGCAGAAGGGCATCCGCCATGAGGTTCTGGAGGGCAATGTGGGCTACCTGCGTATGGACGACATCCCAGGCCAGGAGGTGGTGAGCAAGCTGGGGGGCTTCCTGGTGGCCAGCGTCTGGAGGAAGCTCATGGGCACCTCTGCCTTGGTGCTAGACCTCCGGCACTGCACTGGGGGCCACATTTCCGGCATCCCCTACGTCATCTCCTACCTACACCCAGGGAACACGGTCCTGCACGTAGATACCATCTACAACCGCCCCTCCAATACAACCACTGAGATCTGGACCCTGCCCCAGGTCCTAGGAGAAAGGTACAGTGCCGACAAGGATGTGGTGGTCCTCACCAGCGGCCACACGGGGGGCGTGGCTGAGGACATCACTTACATCCTCAAACAGATGCGCAGGGCCATCGTGGTGGGTGAGCGGACTGTGGGGGGTGCCCTGGACCTCCAGAAGCTGCGGATAGGCCAGTCCGACTTCTTCCTCACTGTGCCCGTGTCCAGGTCCCTAGGGCCCCTGGGAGGGGGCAGCCAGACATGGGAGGGCAGTGGAGTGCTGCCCTGTGTGGGGACACCAGCAGAGCAGGCGCTCGAGAAAGCCCTGGCCATCCTCACTCTGCGCCGGGCCCTGCCAGGAGTTGTGCAGCGCCTGCAGGAGGCACTGCAGGCCTACTACACGCTGGTGGACCGCGTGCCCACCCTGCTGCACCACCTGGCCAACATGGACTTCTCTACGGTGGTCTCTGAGGAGGACCTGGTCACGAAGCTCAACGCTGGTCTACAGACTGCGTCTGAGGACCCCAGGCTCCTGGTGCGGGCCGTCAGGCCCAAGGAAACCCTTTCTGGGCCTGAGGTTGGAGACGATGACCCTCCGGAGGTGATCCCCACAGTGGCCGAGGATGAGGCTGTCCGGCGGGCCCTGGTGGACTCTATGTTCCAGGTGTCCGTGCTGCCGGGCAACGTGGGCTACCTCCGCTTTGACAGCTTTGCCGACGCCTCCGTGCTGGAGGTGCTGAGCCCATACATCGTGCGCCAGGTGTGGGAGCCCCTG0121100000100230320022100021300010000?012110013001002001201?1010101001001102101121001100000015033120?2120122????110101032?1102?????20003110?10001012110121021111110111100101011101(2 3)111010010100111010001?001

Gulo_gulo TGCTGCCCGCCACGGAAGGCCCCGTCGGCTCTACCACCCCCTACGTGGAGGACACCCCCGAGCCACCCCTCCACGACTTCTACTGCAGCCGGCTTCTGGACCTGGTTTTCCTGCTAGACGGCTCCTCCAAGCTGTCTGAGGGCGAGTTCGAAGTGCTGAAGGTCTTTGTGGTGGGCATGATGGAGCGTCTGCACATCTCCCAGAAGCGCATCCGTGTGRCCGTGGTGGAGTACCACGATGGCTCCCACGCCTACATCGAGCTCCAGGACCGGAAGCGGCCCTCAGAGCTGCGGCGCATCGCCAGCCAAGTGAGGTACGTAGGCAGTGAGGTGGCCTCCACCAGCGAAGTCCTCAAGTACACGCTGTTCCAGATCTTCGGCAAGATCGACCGCCCCGAAGCGTCCCGCATCGCCCTGCTCCTCACGGCCAGCCAGGAGCCCCCGAAGCTGGCCCGCAATTTGGTCCGCTACGTGCAGGGCCTGAAGAAGAAGAAAGTCATCGTGATCCCCGTGGGCATCGGGCCCCATGTCAACCTCAAGCAGATCCGCAACATCGAGAAGCAGGCCCCCGAGAACAAGGCCTTCGTGCTCAGTGGTGTGGACGAGCTGGAGCAGCGGAGGGACGAGATTATCAGCTACCTGTGTGACCTGGCCCCCGAAGCACCCCGCCCTACCCAGCAGCCCCCTGTGTYGCCGATCACTGTGGGTCCGGAGCTCTTGGGGGTCCCATCGTCGGGACCCAGAAGGAACTCCATGGTTCTGGATGTGGTGTTCATCCTGGAAGGCTCAGACAAAATTGGAGAGGCCAACTTCAACAAGAGCAGGGACTTCATGGAGGAGGTGATCCGGCGGATGGACGTGAGCCAGGATGGTGTCCATGTCACGGTGCTGCAGTACTCCTACGCCGTGGCCGTGGAGTACACCTTCAGTGAGGCCCAGTCCAAGGGTGAGATCCTGCAGCACGTGCGGGAGATCCGATTCCGGGGCGGCAACAGGACCAACACCGGGCTGGCCCTGCAGTACCTGTCTGAGCACAGCTTCTCCGTCAGCCAGGGGGACCGGGAGCAGGTCCCTAACCTGGTCTACATGGTCACGGGAAACCCCGCCTCTGATGAGATCAAGCGGATGCCTGGAGACATCCAGGTGGTGCCCATCGGAGTGGGCCCTCACGCCGACCCGCAGGAGCTGGAGATAAAGACAGAATGAATGTAGAAAAGGCTGAATTCTGTAATAAAAGCAAACAGCCTGCCTTAGCAAGTAGCCAACAGAGCAGATGGGCCGAAAGTAAGGAAACATGTAATGATAGGCAGACTCCCAGCGCAGAGAGAAAGGTACATCGGAAAGCCGATCCCCCGTGTGGAAGAAGAGAATCGAAGAAGCAGAAACCTCCATGCTCTGACAGTCCTAGAGATTCCCAAGATGTTCCTTGGATAACACTGAATAGTAGCATACAGAAAGTGAATGAGTGGTTTTCCAGAAGTGATGAAATGTTGACTTCCGATGATGACTCACATGACGGGGGATCTGAATCGAAGACCGAAGTAGCTGGTGCAGTAGAAGTTCCAAATGACGTGCACGTATATTCCGGTTCCTCTGAGAAAATAGACTTAATGGCCAGCGAGCCTCAGGATGCTCTGATACGTGAACACGAAAGAGTCTACACCAAGTCAGTAGAGAGTAAAATCGAAGATAAAATATTTGGGAAAACCTACCGGAGGAAGGCAAGCCTCCTTAACGTGAGCCACACGAGCGAAGATCTGATGATAGGAGCGTGTGCTGTAGAACCTCAGACAACGCAAGCCCGTCCTCTCACGAGTAAAGCAAAGCGTAAAAGGAGAACTGCAGCAGGCCTTCATCCTGAGGATTTTATCAAGAAAGTAGATCTGGCCGTCGTGCCAAAGACTCCTGAAAAGCTAGTTGAGGGAACCGACCAAATCGAGCGAAGTGGTCACGTGACGAATATTAGAAATAATGGTCCCGAGGATGAAATAAAAGGTGATTATGTTCAGACCGAGAAAAATGCTAACCCAACAGAATCCCTGGAAAAAGATTCTGCTTTCAGAAGCAGAGCTGAACCGATAAGCAGCAGTATAAACAAGATGGAACTGGAGTTAAATAGCTCCGGTTCGAAAGCCCTTAAGAAGAACAGGCTGCGGAGGAAGTCCTCCACCAGGCACGGCTGTGTGCTTGAATTCGTAGTCAGTCGAAATCCAAGCCCGCCTGATCGCGGCGAACTGCAGAACCATCAGAATTTCTCTGCTGGAAACAATAAGAACAGCATTGAGGCCCACATAGGAATAAATGGAGAAGCCAACCTGGATTTCCTCAACATTCCTTTGACAATTCCTGAAATGACTCTACCCTATACAACACTCACAACTCCCCAGGTGAAAGATTTCTCCCTTTGGGAAAAAACAGGCTTGAAGGATTTCTTGAAGACAACAAAGCAATCATTTGATTTAAGTGTAAAGGCTCAGTATAAGAAAAACAAAGACAAGCACATCATCCCAACTCCTTTTTATGCAAAAGATTTCCAGGTATTGAGTACCCCAAATGATATTTTCATTCCAGCCATGGGCAATATTACCTATGACTTTTCCTTTAAGTCAGGCATCATCACACTGAATACCAATGTTGGACTGTATAACCAGTCAGATATTGTTGCTTATTTCCTAACTTCATCTTCTTCTGTCACTGATGCTCTGCAGTACAAATTAGAAGGCACCTCAAGTTTGACGAGGAAAAGAGGCTTGAAGCTAGCCACAGCTTTGTCTCTGAGTAATAAATTTGTGGAAGGAAATCATGACAGTACTATTAGTTTGACCAAGAAAAACATGGAGGCCTCAGTGACAACATCTGCAGAAGTCCAAATTCCTATTTTGAGAATGAAATTCAAGCAAGAACTTAATGGAAATACCAAGTCGAAGCCTACTGTCTCTTCATCCATTGAATTAATGTATGATCTCAAT---------------TCTACTGCTACAGGAACAATCAACCACAAACTCAACTTAGAGAGCCTCACCTCTTACTTTTACATTGAGTCATCTACCAAAGGAGATATCAAGGGCTCAGTACTTTCAATAGAATATTCAGGAACTATTGCCAGCGAAGCCAGCACTTACTTGAATTCCAAGAGTACTCGGTCTTCAGTGAAGCTGCAAGGGGCTTCCAAAGTTGATGGTATCTGGAACCCATGAGAGCCCAAGACCTTGATGACTACCTGAACGGCCCCTTCACGGTCGTGGTCAAGGAGTCTTGCGACGGAATGGGAGACGTGAGCGAGAAACACGGGAGCGGGCCCGCGGTTCCAGAAAAGGCGGTTCGGTTTTCGTTCACGGTCATGAAAATTACGATAGCACGTGGCTCAGAACACGTGAAGGTGTTTGAAGAGGTCAAACCCAACTCCGAACTGTGTTGTAAGCCCCTGTGTCTCATGCTGGCAGATGAGTCTGACCACGAGACCCTGACGGCCATCCTGAGCCCTCTCATTGCTGAGAGGGAGGCCATGAAGAGCAGCCAGTTAATGCTTGAGATGGGAGGCATCCTTCGGAGTTTCAAGTTCATCTTCAGGGGCACCGGCTACGATGAGAAACTCGTCCGGGAAGTCGAAGGCCTCGAGGCTTCTGGCTCAGTCTACATTTGTACCCTTTGTGACGCCACACGCCTAGAAGCGTCTCAAAACCTCGTCTTCCACTCCATCACCAGAAGCCACTCCGAGAACCTGGAGCGCTATGAGGTCTGGCGTTCTAACCCGTACCACGAGTCCGTGGAAGAGCTGCGGGATCGGGTGAAAGGGGTCTCGTCGAAACCTTTCATCGAGACGGTCCCTTCCATAGATGCGCTCCACTGTGACATTGGCAATGCAGCCGAGTTCTACAAGATCTTCCAGCTAGAGATAGGGGAGGCGTATAAGAATCCCAACGCCTCCAAAGAGGAAAGGAAGAGATGGCAGGCTACACTGGACAAGCATCTCCGCAAGAAGATGAACCTGAAACCGATCATGAGGATGAATGGCAACTTTGCCAGGAAGCTCATGACCAAAGAGACAGTTGAAGTAGTCTGTGAGTTAATTCCCTCTGAGGAGAGGCACGAAGCTCTGAGGGAGCTGATGGACCTTTACCTTAAAATGAAGCCTGTGTGGCGATCATCGTGTCCTGCCAAAGAGTGCCCAGAATCTCTCTGCCAGTATAGCTTCAATTCACAGCGTTTTGCTGAGCTCCTCTCTACCAAGTTCAAGTATAGATATGAGGGCAAAATCACCAATTATTTTCACAAAACCCTGGCACA????GCCCATGTGCTGACCACCGGGGTGCAGAGCTCCTTGAACGACCCTCGCCTGGTCATCTCCTATGAGCCCAGCACCCTCGAGGCTCCCCGGCAAGCTTCAGCCCTCACCAACCTCACCCAAGAGGAACTGCTTGCCCGCTTGCAGAAGGGCATCCGCCACGAGGTCCTGGAGGGCAACGTGGGCTACTTGCGTGTGGACGACATCCCAGGCCAGGAGGTGGTGAGCAAGCTGGGGGGCTTCCTGGTGGCCAGCGTCTGGAGGAAGCTCATGGGCACCTCCGCCTTGGTGCTGGACCTCCGACACTGCACTGGGGGCCACATTTCTGGTATCCCCTACTTCATCTCCTACCTGCACCCAGGGAACACAGTCCTGCACGTGGATACCATCTACGACCGCCCCTCCAATACGACCACTGAGATCTGGACCCTGCCCCAGGTCCTGGGAGAAAGGTACAGTGCGGACAAGGATGTGGTGGTCCTCACCAGCGGCCACACGGGGGGCGTGGCTGAGGACATCACTTATATCCTCAAACAGATGCGCAGAGCCATTGTGGTGGGCGAGCGGACTGGTGGGGGTGCCCTAGACCTCCAGAAGCTAAGGATAGGCCAGTCCGACTTCTTCCTCACCGTGCCCGTGTCCAGGTCTCTAGGGCCCTTGGGAGGGGGCAGCCAGACCTGGGAGGGCAGCGGGGTGCTACCCTGTGTGGGGACACCAGCGGAGCAGGCCCTAGAGAAAGCCCTGGCCATCCTCACTTTGCGCCGGGCCCTGCCCGGAGTGGTGCGGCGCCTGCAGGGGGCGCTCCAGGCCCACTACACGCTGGTGGACCGCGTGCCCGCCCTGCTGCACCACCTGGCCAACATGGACTTCTCTGCGGTGGTCTCCGAGGAGGACCTGGTCGCGAAGCTCAACGCAGGTCTGCAGACTGCGTCCGAGGACCCCAGGCTCCTGGTGCGGGCCGTCAGGCCCAAGGAAACCTCTTCTGGGCCTGAGGTTGGAGAGGACGACCCTCCGGAGGTGGTCCCCACAGTGCCCGACGATGAGGCTGCCCGGCGAGCCCTAGTGGGCGCTATGTTCCAGGTGTCCGTGCTGCCCGGCAACGTGGGCTACCTCCGCTTTGACAGCTTTGCCAACGCCTCGGTGCTGGAGGCGCTGAGCCCCTACATCGTGCGTCAGGTGTGGGGGCCCCTG000011100001011000000?101030210000001?0?30030130101021000100?00000000000000000100000000000001010002002001202????100000001001?11?1?32110100100001???00010?100000000000000000000100000000000110000000000100110

Halichoerus_grypus ????????????????????????????????????????????????????????????????????????????????????????????????????????????????????????????????????????????????????????????????????????????????????????????????????????????????????????????????????????????????????????????????????????????????????????????????????????????????????????????????????????????????????????????????????????????????????????????????????????????????????????????????????????????????????????????????????????????????????????????????????????????????????????????????????????????????????????????????????????????????????????????????????????????????????????????????????????????????????????????????????????????????????????????????????????????????????????????????????????????????????????????????????????????????????????????????????????????????????????????????????????????????????????????????????????????????????????????????????????????????????????????????????????????????????????????????????????????????????????????????????????????????????????????????????????????????????????????????????????????????????????????????????????????????????????????????????????????????????????????????????????????????????????????????????????????????????????????????????????????????????????????????????????????????????????????????????????????????????????????????????????????????????????????????????????????????????????????????????????????????????????????????????????????????????????????????????????????????????????????????????????????????????????????????????????????????????????????????????????????????????????????????????????????????????????????????????????????????????????????????????????????????????????????????????????????????????????????????????????????????????????????????????????????????????????????????????????????????????????????????????????????????????????????????????????????????????????????????????????????????????????????????????????????????????????????????????????????????????????????????????????????????????????????????????????????????????????????????????????????????????????????????????????????????????????????????????????????????????????????????????????????????????????????????????????????????????????????????????????????????????????????????????????????????????????????????????????????????????????????????-----------TTCTCTGCTGGAAACAATGAGAACAGCACTGAGGCCCACGTAGGAATAAATGGAGAAGCCAACCTGGATTTCCTCAACATTCCTTTGACAATTCCTGAAATGACTGTACCTTACACAATGCTCACAACTCCCCAGGTGAAAGATTTCTCCTTGTGGGAGAAAACAGGCTTGAAGGATTTCTTGAAGACAACAAAGCAATCATTTGATTTAAGTGTAAAGGCCCAGTATAAGAAAAACAAAGACAAGCATATCATCCCAATTCCTTTTTATGCAAAAGATTTCCAGGTATTGAGTACCCCAAATGATATTTTCATTCCAGCCATGGGCAATGTTACCTATGACTTTTCTTTTAAATCAGGCATCATCACACTGAATACCAATGTTGGACTGTATAACCAGTCAGATATTGTTGCTCATTTCCTAACTTCCTCTTCTTCTGTTACTGATGCACTGCAGTACAAATTAGAGGGCACCTCAAGTTTGACGAGGAAAAGAGGCTTGAAGCTAGCCACAGCTTTGTCTCTGACTAACAAATTCGTGGAAGGCAATCATGACAGTACTATTAGTTTGACCAGGAAAAACATGGAGGCATCAGTGACAACATCTGCAAAAGTCCAAATTCCCATTTTGAGAATGAATTTCAAGCAAGAACTTAATGGAAATACCAAGTCGAAGCCTACTGTCTCTTCATCCATTGAATTAACATACGATCTCAATTCCCCTGAACTGTACTCTACTGCCACAGGGACAGTCAACCACAAACTCAACTTAGAGAGCCTCACCTCTTACTTTTCCATTGAGTCATCTACCAAAGGGGATATCAAGGGTTCAGTACTTTCAAGGGAATATTCAGGAACTATTGCCAGTGAGGCCAGCACTTACTTGAATTCCAAGAGTACTCGGTCTTCAGTGAAGCTGCAAGGGGCTTCCAAAGTTGATG???CCTGGAAGGCATGAGAGCCCRAGACCTTGATGACTACCTGAATGGCCCCTTCACTGTCGTGGTGAAGGAGTCTTGTGACGGAATGGGAGATGTGAGCGAGAAGCACGGGAGTGGGCCAGCAGTTCCAGAAAAGGCAGTTCGGTTTTCGTTCACGGTCATGAAAATTACTGTAGCCCATGGCTCAGAAAACGTGAAGGTGTTTGAAGAAGTCAAACCCAACTCCGAACTGTGTTGTAAGCCCCTGTGTCTCATGCTGGCAGATGAGTCTGACCACGAGACCCTGACGGCCATCCTGAGCCCTCTCATTGCCGAGAGGGAGGCCATGAAGAGCAGCCAATTAATGCTTGAGATGGGAGGCATCCTTCGGACTTTCAAGTTCATCTTCAGGGGCACTGGATATGATGAGAAACTCGTCCGGGAAGTCGAAGGCCTTGAGGCTTCTGGCTCAGTCTACATTTGTACCCTTTGTGACGCCACCCGCCTGGAAGCCTCTCAGAATCTTGTCTTCCACTCCATCACCAGAAGCCACTCTGAGAACCTGGAGCGCTATGAGGTCTGGCGTTCCAACCCATACCACGAGTCGGTGGAAGAACTGCGGGATCGGGTGAAAGGGGTCTCATCGAAACCTTTCATCGAGACTGTCCCTTCCATAGATGCACTCCACTGTGACATTGGCAATGCGGCTGAGTTCTACAAGATTTTCCAGCTAGAGATAGGGGAGGTGTATAAGAATCCCAATGCTTCCAAAGAGGAAAGGAAAAGATGGCAGGCTACATTGGACAAGCATCTCCGGAAGAAGATGAACCTGAAACCCATCATGAGGATGAATGGCAACTTTGCCAGGAAGCTCATGACCAAAGAGACAGTTGAAGCAGTTTGTGAATTAATTCCCTCTGAGGAGAGGCACGAAGCTCTGAGGGAGCTGATGGACCTTTACCTGAAGATGAAGCCTGTATGGCGATCATCGTGTCCTGCAAAAGAGTGCCCAGAATCCCTCTGCCAGTATAGCTTCAATTCACAGCGTTTTGCTGAGCTCCTCTCTACCAAGTTCAAGTATAGATATGAGGGCAAAATCACCAATTATTTTCACAAAACCCTGGCACACGTCGCCCATGTGCTGACCACGGGGGTGCAGAGCTCCTTGAACGACCCTCGCCTGGTCATCTCATATGAGCCCAGCACCCTTGAGGCTCCCCGGCAAGCCCCAGCACTCACCAACCTCACACAAGAGGAACAGCTTGCCCGGTTGCAGAAGGGCATCCGCCACGAGGTTCTGGAGGGCAAYGTGGGCTACCTGCGTATGGACGACATCCCAGGCCAGGAGGTGGTGAGCAAGCTGGGGGGCTTCCTGGTGACCAGCGTCTGGAGGAAGCTCATGGGCACCTCTGCCTTGGTGCTGGACCTCCGGCACTGCACTGGGGGCCATATTTCCGGCATCCCCTACGTCATCTCCTACCTACACCCAGGGAACACAGTCCTGCACGTGGATACCATCTACAACCGCCCCTCCAATACAACCACTGAGATCTGGACCCTGCCCCAGGTCCTAGGAGAAAGGTACAGTGCCGACAAGGATGTGGTGGTCCTCACCAGCGGCCACACGGGGGGCGTGGCTGAGGACATCACTTACATCCTCAAACAGATGCGCAGGGCCATCGTGGTGGGTGAGCGGACTGTGGGGGGTGCCCTGGACCTCCAGAAGCTGCGGATAGGCCAGTCCGACTTCTTCCTCACTGTGCCCGTGTCCAGGTCCCTAGGGCCCCTGGGAGGAGGCAGCCAGACATGGGAGGGCAGCGGGGTGCTGCCCTGCGTGGGGACACCAGCAGAGCAGGCGCTCGAGAAAGCCCTGGCCATCCTCACTCTGCGCCGGGCCCTGCCAGGAGTCGTGCAGCGCCTGCAGGAGGCCCTGCAAGCCTACTACACGCTGGTGGACCGCGTGCCCACCCTGCTGCACCACCTGGCCAACATGGACTTCTCTGCGGTGGTCTCCGAGGAGGACCTGGTCACGAAGCTCAACGCTGGTCTACAGACTGCGTCTGAGGACCCCAGGCTCCTGGTGCGGGCCGTCAGGCCCAAGGAAACCTTTTCTGGGCCTGAGGTCGGAGACGATGACCCTCCGGAGGTGGTCCCCACAGTGGCCGAGGATGAGGCTGTCCGGCGGGCGCTGGTGGACTCTATGTTCCAGGTGTCCGTGCTGCCGGGCAACGTGGGCTACCTCCGCTTTGACAGCTTTGCCGACGCCTCGGTGCTGGAGGTGCTGAGCCCATACATCGTGCACCAGGTGTG??????????0020120020100331100102101110313112100?0?400032010311201?020021?2121011111222111020000100000015032120?2120122????11?001002?0102?????2000111111100000100112002211101000120111121201111010020111000111010110301

Hemicyon_sp ????????????????????????????????????????????????????????????????????????????????????????????????????????????????????????????????????????????????????????????????????????????????????????????????????????????????????????????????????????????????????????????????????????????????????????????????????????????????????????????????????????????????????????????????????????????????????????????????????????????????????????????????????????????????????????????????????????????????????????????????????????????????????????????????????????????????????????????????????????????????????????????????????????????????????????????????????????????????????????????????????????????????????????????????????????????????????????????????????????????????????????????????????????????????????????????????????????????????????????????????????????????????????????????????????????????????????????????????????????????????????????????????????????????????????????????????????????????????????????????????????????????????????????????????????????????????????????????????????????????????????????????????????????????????????????????????????????????????????????????????????????????????????????????????????????????????????????????????????????????????????????????????????????????????????????????????????????????????????????????????????????????????????????????????????????????????????????????????????????????????????????????????????????????????????????????????????????????????????????????????????????????????????????????????????????????????????????????????????????????????????????????????????????????????????????????????????????????????????????????????????????????????????????????????????????????????????????????????????????????????????????????????????????????????????????????????????????????????????????????????????????????????????????????????????????????????????????????????????????????????????????????????????????????????????????????????????????????????????????????????????????????????????????????????????????????????????????????????????????????????????????????????????????????????????????????????????????????????????????????????????????????????????????????????????????????????????????????????????????????????????????????????????????????????????????????????????????????????????????????????????????????????????????????????????????????????????????????????????????????????????????????????????????????????????????????????????????????????????????????????????????????????????????????????????????????????????????????????????????????????????????????????????????????????????????????????????????????????????????????????????????????????????????????????????????????????????????????????????????????????????????????????????????????????????????????????????????????????????????????????????????????????????????????????????????????????????????????????????????????????????????????????????????????????????????????????????????????????????????????????????????????????????????????????????????????????????????????????????????????????????????????????????????????????????????????????????????????????????????????????????????????????????????????????????????????????????????????????????????????????????????????????????????????????????????????????????????????????????????????????????????????????????????????????????????????????????????????????????????????????????????????????????????????????????????????????????????????????????????????????????????????????????????????????????????????????????????????????????????????????????????????????????????????????????????????????????????????????????????????????????????????????????????????????????????????????????????????????????????????????????????????????????????????????????????????????????????????????????????????????????????????????????????????????????????????????????????????????????????????????????????????????????????????????????????????????????????????????????????????????????????????????????????????????????????????????????????????????????????????????????????????????????????????????????????????????????????????????????????????????????????????????????????????????????????????????????????????????????????????????????????????????????????????????????????????????????????????????????????????????????????????????????????????????????????????????????????????????????????????????????????????????????????????????????????????????????????????????????????????????????????????????????????????????????????????????????????????????????????????????????????????????????????????????????????????????????????????????????????????????????????????????????????????????????????????????????????????????????????????????????????????????????????????????????????????????????????????????????????????????????????????????????????????????????????????????????????????????????????????????????????????????????????????????????????????????????????????????????????????????????????????????????????????????????????????????????????????????????????????????????????????????????????????????????????????????????????????????????????????????????????????????????????????????????????????????????????????????????????????????????????????????????????????????????????????????????????????????????????????????????????????????????????????????????????????????????????????????????????????????????????????????????????????????????????????????????????????????????????????????????????????????????????????????????????????????????????????????????????????????????????????????????????????????????????????????????????????????????????????????????????????????????????????????????????????????????????????0????????????????????????????????????????????????????????????????????????????????0012?0000010200?001011????0?01110(0 2)0101101????????????????????????????????????????????????????????????????????????

Hesperocyon_gregarius ??????????????????????????????????????????????????????????????????????????????????????????????????????????????????????????????????????????????????????????????????????????????????????????????????????????????????????????????????????????????????????????????????????????????????????????????????????????????????????????????????????????????????????????????????????????????????????????????????????????????????????????????????????????????????????????????????????????????????????????????????????????????????????????????????????????????????????????????????????????????????????????????????????????????????????????????????????????????????????????????????????????????????????????????????????????????????????????????????????????????????????????????????????????????????????????????????????????????????????????????????????????????????????????????????????????????????????????????????????????????????????????????????????????????????????????????????????????????????????????????????????????????????????????????????????????????????????????????????????????????????????????????????????????????????????????????????????????????????????????????????????????????????????????????????????????????????????????????????????????????????????????????????????????????????????????????????????????????????????????????????????????????????????????????????????????????????????????????????????????????????????????????????????????????????????????????????????????????????????????????????????????????????????????????????????????????????????????????????????????????????????????????????????????????????????????????????????????????????????????????????????????????????????????????????????????????????????????????????????????????????????????????????????????????????????????????????????????????????????????????????????????????????????????????????????????????????????????????????????????????????????????????????????????????????????????????????????????????????????????????????????????????????????????????????????????????????????????????????????????????????????????????????????????????????????????????????????????????????????????????????????????????????????????????????????????????????????????????????????????????????????????????????????????????????????????????????????????????????????????????????????????????????????????????????????????????????????????????????????????????????????????????????????????????????????????????????????????????????????????????????????????????????????????????????????????????????????????????????????????????????????????????????????????????????????????????????????????????????????????????????????????????????????????????????????????????????????????????????????????????????????????????????????????????????????????????????????????????????????????????????????????????????????????????????????????????????????????????????????????????????????????????????????????????????????????????????????????????????????????????????????????????????????????????????????????????????????????????????????????????????????????????????????????????????????????????????????????????????????????????????????????????????????????????????????????????????????????????????????????????????????????????????????????????????????????????????????????????????????????????????????????????????????????????????????????????????????????????????????????????????????????????????????????????????????????????????????????????????????????????????????????????????????????????????????????????????????????????????????????????????????????????????????????????????????????????????????????????????????????????????????????????????????????????????????????????????????????????????????????????????????????????????????????????????????????????????????????????????????????????????????????????????????????????????????????????????????????????????????????????????????????????????????????????????????????????????????????????????????????????????????????????????????????????????????????????????????????????????????????????????????????????????????????????????????????????????????????????????????????????????????????????????????????????????????????????????????????????????????????????????????????????????????????????????????????????????????????????????????????????????????????????????????????????????????????????????????????????????????????????????????????????????????????????????????????????????????????????????????????????????????????????????????????????????????????????????????????????????????????????????????????????????????????????????????????????????????????????????????????????????????????????????????????????????????????????????????????????????????????????????????????????????????????????????????????????????????????????????????????????????????????????????????????????????????????????????????????????????????????????????????????????????????????????????????????????????????????????????????????????????????????????????????????????????????????????????????????????????????????????????????????????????????????????????????????????????????????????????????????????????????????????????????????????????????????????????????????????????????????????????????????????????????????????????????????????????????????????????????????????????????????????????????????????????????????????????????????????????????????????????????????????????????????????????????????????????????????????????????????????????????????????????????????????????????????????????????????????????????????????????????????????????????????????????????????????????????????????????????????????????????????????????????????????????????????????????00000200?000000?000101????00?000000001000001?010?00001??010000???????????????01000?0?00000000000000000000000010110000011000001102100010????????????010100?0??????????????????????000?0000?0????0000????????0

Imagotaria_downsi ??????????????????????????????????????????????????????????????????????????????????????????????????????????????????????????????????????????????????????????????????????????????????????????????????????????????????????????????????????????????????????????????????????????????????????????????????????????????????????????????????????????????????????????????????????????????????????????????????????????????????????????????????????????????????????????????????????????????????????????????????????????????????????????????????????????????????????????????????????????????????????????????????????????????????????????????????????????????????????????????????????????????????????????????????????????????????????????????????????????????????????????????????????????????????????????????????????????????????????????????????????????????????????????????????????????????????????????????????????????????????????????????????????????????????????????????????????????????????????????????????????????????????????????????????????????????????????????????????????????????????????????????????????????????????????????????????????????????????????????????????????????????????????????????????????????????????????????????????????????????????????????????????????????????????????????????????????????????????????????????????????????????????????????????????????????????????????????????????????????????????????????????????????????????????????????????????????????????????????????????????????????????????????????????????????????????????????????????????????????????????????????????????????????????????????????????????????????????????????????????????????????????????????????????????????????????????????????????????????????????????????????????????????????????????????????????????????????????????????????????????????????????????????????????????????????????????????????????????????????????????????????????????????????????????????????????????????????????????????????????????????????????????????????????????????????????????????????????????????????????????????????????????????????????????????????????????????????????????????????????????????????????????????????????????????????????????????????????????????????????????????????????????????????????????????????????????????????????????????????????????????????????????????????????????????????????????????????????????????????????????????????????????????????????????????????????????????????????????????????????????????????????????????????????????????????????????????????????????????????????????????????????????????????????????????????????????????????????????????????????????????????????????????????????????????????????????????????????????????????????????????????????????????????????????????????????????????????????????????????????????????????????????????????????????????????????????????????????????????????????????????????????????????????????????????????????????????????????????????????????????????????????????????????????????????????????????????????????????????????????????????????????????????????????????????????????????????????????????????????????????????????????????????????????????????????????????????????????????????????????????????????????????????????????????????????????????????????????????????????????????????????????????????????????????????????????????????????????????????????????????????????????????????????????????????????????????????????????????????????????????????????????????????????????????????????????????????????????????????????????????????????????????????????????????????????????????????????????????????????????????????????????????????????????????????????????????????????????????????????????????????????????????????????????????????????????????????????????????????????????????????????????????????????????????????????????????????????????????????????????????????????????????????????????????????????????????????????????????????????????????????????????????????????????????????????????????????????????????????????????????????????????????????????????????????????????????????????????????????????????????????????????????????????????????????????????????????????????????????????????????????????????????????????????????????????????????????????????????????????????????????????????????????????????????????????????????????????????????????????????????????????????????????????????????????????????????????????????????????????????????????????????????????????????????????????????????????????????????????????????????????????????????????????????????????????????????????????????????????????????????????????????????????????????????????????????????????????????????????????????????????????????????????????????????????????????????????????????????????????????????????????????????????????????????????????????????????????????????????????????????????????????????????????????????????????????????????????????????????????????????????????????????????????????????????????????????????????????????????????????????????????????????????????????????????????????????????????????????????????????????????????????????????????????????????????????????????????????????????????????????????????????????????????????????????????????????????????????????????????????????????????????????????????????????????????????????????????????????????????????????????????????????????????????????????????????????????????????????????????????????????????????????????????????????????????????????????????????????????????????????????????????????????????????????????????????????????????????????????????????????????????????????????????????????????????????????0?21101102110?3?131112000310302011000???21103230?1000?00110?11?1?110010?11?2101130?011001????2033?????????110???110(0 1)0?511?1102??????00???0??1???1001110121132111111???1????????1????0???101010101101?1??10??

Kolponomos_sp ??????????????????????????????????????????????????????????????????????????????????????????????????????????????????????????????????????????????????????????????????????????????????????????????????????????????????????????????????????????????????????????????????????????????????????????????????????????????????????????????????????????????????????????????????????????????????????????????????????????????????????????????????????????????????????????????????????????????????????????????????????????????????????????????????????????????????????????????????????????????????????????????????????????????????????????????????????????????????????????????????????????????????????????????????????????????????????????????????????????????????????????????????????????????????????????????????????????????????????????????????????????????????????????????????????????????????????????????????????????????????????????????????????????????????????????????????????????????????????????????????????????????????????????????????????????????????????????????????????????????????????????????????????????????????????????????????????????????????????????????????????????????????????????????????????????????????????????????????????????????????????????????????????????????????????????????????????????????????????????????????????????????????????????????????????????????????????????????????????????????????????????????????????????????????????????????????????????????????????????????????????????????????????????????????????????????????????????????????????????????????????????????????????????????????????????????????????????????????????????????????????????????????????????????????????????????????????????????????????????????????????????????????????????????????????????????????????????????????????????????????????????????????????????????????????????????????????????????????????????????????????????????????????????????????????????????????????????????????????????????????????????????????????????????????????????????????????????????????????????????????????????????????????????????????????????????????????????????????????????????????????????????????????????????????????????????????????????????????????????????????????????????????????????????????????????????????????????????????????????????????????????????????????????????????????????????????????????????????????????????????????????????????????????????????????????????????????????????????????????????????????????????????????????????????????????????????????????????????????????????????????????????????????????????????????????????????????????????????????????????????????????????????????????????????????????????????????????????????????????????????????????????????????????????????????????????????????????????????????????????????????????????????????????????????????????????????????????????????????????????????????????????????????????????????????????????????????????????????????????????????????????????????????????????????????????????????????????????????????????????????????????????????????????????????????????????????????????????????????????????????????????????????????????????????????????????????????????????????????????????????????????????????????????????????????????????????????????????????????????????????????????????????????????????????????????????????????????????????????????????????????????????????????????????????????????????????????????????????????????????????????????????????????????????????????????????????????????????????????????????????????????????????????????????????????????????????????????????????????????????????????????????????????????????????????????????????????????????????????????????????????????????????????????????????????????????????????????????????????????????????????????????????????????????????????????????????????????????????????????????????????????????????????????????????????????????????????????????????????????????????????????????????????????????????????????????????????????????????????????????????????????????????????????????????????????????????????????????????????????????????????????????????????????????????????????????????????????????????????????????????????????????????????????????????????????????????????????????????????????????????????????????????????????????????????????????????????????????????????????????????????????????????????????????????????????????????????????????????????????????????????????????????????????????????????????????????????????????????????????????????????????????????????????????????????????????????????????????????????????????????????????????????????????????????????????????????????????????????????????????????????????????????????????????????????????????????????????????????????????????????????????????????????????????????????????????????????????????????????????????????????????????????????????????????????????????????????????????????????????????????????????????????????????????????????????????????????????????????????????????????????????????????????????????????????????????????????????????????????????????????????????????????????????????????????????????????????????????????????????????????????????????????????????????????????????????????????????????????????????????????????????????????????????????????????????????????????????????????????????????????????????????????????????????????????????????????????????????????????????????????????????????????????????????????????????????????????????????????????????????????????????????????????????????????????????????????????????????????????????????????????????????????????????????????????????????????000001(0 1)(0 1)2011023001100?100000302010100???1010?230?1100???000?10???????????????0112110??001110132011111212000011101100002001022011?132??0?0???????????????????????0???????????????????????????????????????????

Lontra_sp TGGTGCCCCCCACGGAAGGCCCCGTCGGCTCCCCCACTCCGTACGTGGAGGACACCCCCGAGCCGCCCCTCCACGACTTCTACTGCAGCCGGCTTCTGGACCTGGTTTTCCTGCTAGACGGCTCCTCCAAGCTGTCTGAGGGCGAGTTCCAAGTGCTGAAGGTCTTTGTGGTGGGCATGATGGAGCGTCTGCACATCTCCCAGAAGCGCATCCGCGTGGCTGTGGTGGAGTACCACGACGGCTCCCACTCCTACATCGAGCTCCAAGACCGGAAGCGGCCCTCAGAGCTGCGGCGCATCGCCAGCCAAGTGAGGTACGTGGGCAGCGAGGTGGCCTCCACCAGCGAGGTCCTCAAGTACACGCTGTTCCAAATCTTCGGGAAGATCGACCGTCCCGAAGCCTCCCGCATCGCTCTGCTCCTCACGGCCAGCCAGCAGCCCCCGAAGCTGGCCCGCAATCTGGTCCGCTACGTGCAGGGCCTGAAGAAGAAGAAAGTCATCGTGATCCCCGTGGGCATTGGGCCCCACGTCAACCTCAAGCAGATCCACAACATCGAGAAGCAGGCCCCGGAGAACAAGGCCTTCGTGCTCAGCAGTGTGGACGAGCTGGAGCAGCGGAGGGACGAGATTATCAGCTACCTGTGTGACCTGGCCCCCGAAGCACCCCGCCTTACCCAGCAGCCCCCTGTGTTGTCGGTCACTGTGGGTCCGGAGCTTTTGGGGGTCCCATCGTCGGGACCCGGAAGGAACTCCATGGTTCTGGATGTGGTGTTCATCCTGGAAGGCTCAGACAAAATTGGAGAGGCCAACTTCAACAAGAGCAGGGACTTCATGGAGGAGGTGATCCGGCGGATGGACGTGAGCCAGGATGGCATCCATGTCACGGTGCTGCAGTACTCCTACGCCGTGGCCGTGGAGTACACCTTCAGCGAGGCCCAGTCCAAGGGTGAAGTCCTGCAGCACTTGCGGGAGATCCGATTCCGGGGCGGCAACAGGACCAACACCGGGCTGGCCCTGCAGTACCTGTCTGAGCACAGCTTCTCCATCAGCCAGGGGGACCGGGAGCAGGTCCCTAACCTGGTCTACATGGTCACGGGAAACCCCGCCTCTGATGAGATCAAGCGGATGCCCGGAGACGTCCAGGTGGTGCCCATCGGAGTGGGCCCTCACGCCGACCCGCAGGAGCTGGAGATAAAGACAGAATGAATGTAGAAAAGGCTGAATTCTGTAATAAAAGCAAACAGCCTGCCTTAGCAAGGAGCCAACAGAGCAGATGGGCCGAAAGTAAGGAAACATGTAATGATAGGCAGACTCCCAGCACAGAGAGAAAGGTACTTCTGAAAGCCGATCCCCTGCGTGGGAGAAGAGAACCGAAGAAGCAGAAACCTCTACGCTCTGGCAGTCCTAGAGATTCCCAAGATGTTCCTTGGATAACACTGAATAGTAGCATACAGAAAGTGAATGAGTGGTTTTCCAGAAGCGATGAAATGTTAACTTCCGATGATGACTCACATGACGGGGGATCTGAATCGAAGACCGAAGTAGCTGGTGCAGTAGAAGTTCCAAATGAAGTGCACATATGTTCCGGTTCCTCTGAGAAAATAGACTTAATGGCCAGCGAGCCTCAGGATGCTCTGATACGTGAACGGGAAAGAGTCCACACCAAGTCAGTAGAGAGTAACATCGAAGATAAAATATTTGGGAAAACCTACCGGAGGAAGGCAAGCCTCCTTAACGTGAGCCACACGAGCGAAGATCTGCTTATAGGAGCGTGTGCTGGAGAACCTCAGACAGCGCAAGCTCATCCCCTCACGAGTAAAGCAAAGCGTAAAAAGAGAACTACAGCAGGCCTTCGTCCTGAGGATTTTATCAAGAAAGTAGATCTGGCTGTCGTTCCAAAGACTCCTGAAAAGCTAGTTGAGGGAACCGACCAACTCAAGCAACGTGGTCACGTGACGAAGATTAAAAATAATAGTCCGGAGGATGAAATAAAAGGTGATTATGTTCAGACCGAGAAATATGCTAACCCAACAGAATCCCTGGAAAAAGATTCTGCTTTCAGAAGCAGAGCTGAAGCGATAAGCAGCAGTATAAGCAAGATGGAACTGGAATTAAATGGCTCCGGTCTGAAAGCCTTTAAGAAGAACAGACTGCGGAGGAAGTCCTCCACCAGGCACGCCTGCGCGCTTGAATTCGTAGTCAGTCAAAATCCAAGCCCACCTGATCGCAGCGAACTGCAGAACCATCATAATTTCTCTGCTGGAAACAATGAGAACAGCATTGAGGCCCACATAGGAATAAATGGAGAAGCCAACCTGGATTTCCTCAACATTCCTTTGATGATTCCTGAAATGACTCTACCTTACACAACACTCACAACTCCCCAGGTGAAAGATTTCTCCCTTTGGGAAAAAACAGGCTTGAAGGATTTCTTGAAGACAACAAAGCAATCATTTGATTTAAGTGTAAAGGCTCAGTATAAGAAAAACAAAGATGAGCACATCATCCCAATTCCTTTTTATGCAAAAGATTTCCAGGTACTGAGTACCCCAAATGATATTTTCATTCCAGCCATGGGCAATATTACCTATGACTTTTCCTTTAAGTCAGGCATCATCACGCTGAATACCAATGTTGGACTATATAACCAGTCAGATATTGTTGCTTATTTCCTAACTTCCTCTTCTTCTGTCACTGATGCTCTGCAGTACAAATTAGAGGGCACCTCAAGTTTGACGAGGAAAAGAGGCTTGAAGCTAGCCACAGCTTTGTCTCTGAGTAATAAATTTGTGGAAGGAAATCATGACAGTACTTTTAGTTTGACCAAGAAAAACATGGAGGCTTCAGTGACAACATCTGCAGAAGTCCAAATTCCTATTTTGAGAATGAAATTCAAGCAAGAACTTAATGGAAATACCAAGTCAAAGCCTACAGTCTCTTCATCCATTGAATTAATGTATGATCTCAAT---------------TCTACTGCTACAGGAACAATCAACCACAAACTCAACTTAGAGAGCCTCACCTCTTACTTTTACATTGAGTCATCTACCAAAGGAGATATCAAGGGCTCAGTACTTTCAATAGAATATTCAGGAACTATTGCCAGCGAAGCCAGCACTTACTTGAATTCCAAGAGTACTCGGTCTTCAGTGAAGCTGCAAGGGGCTTCCAAAGTTGATGGTATCTGGAACCCATGAGAGCCCAAGACCTTGATGATTACCTCAACGGCCCCTTCACCGTCGTGGTGAAGGAGTCTTGCGATGGAATGGGAGATGTGAGCGAGAAGCACGGGAGCGGGCCCGTGGTTCCAGAAAAGGCCGTTCGGTTTTCGTTCACGGTCATGAAAATTACGATAGCACGTGGCTCCGAACATGTGAAGGTGTTTGAAGAAGTCAAACCCAACTCCGAGCTGTGCTGTAAGCCCCTGTGTCTCATGCTGGCGGATGAGTCTGACCACGAGACCCTGACGGCCATCCTGAGCCCTCTCATTGCTGAGAGGGAGGCCATGAAGAGCAGCCAATTAATGCTCGAGATGGGAGGCATCCTTCGGAGTTTCAAGTTCATCTTCAGGGGCACCGGCTACGATGAGAAACTCGTCCGGGAAGTTGAAGGCCTCGAGGCTTCTGGCTCAGTCTACATTTGTACCCTTTGTGACGCCACCCGCCTAGAAGCGTCTCAAAATCTCGTCTTCCACTCCATCACCAGAAGCCACTCTGAGAACCTGGAGCGCTATGAGGTCTGGCGTTCTAACCCGTACCACGAGTCGGTGGAAGAGCTGCGGGACCGGGTGAAAGGGGTCTCATCGAAACCTTTCATCGAGACGGTCCCTTCCATAGATGCGCTCCACTGTGACATTGGCAATGCAGCCGAGTTCTACAAGATTTTCCAGCTAGAGATAGGGGAGGTGTACAAGAATCCCAACGCCTCCAAAGAGGAAAGGAAGAGATGGCAGGCTACGTTGGACAAGCATCTCCGGAAGAAGATGAACCTGAAACCCATCATGAGGATGAATGGCAACTTTGCCAGGAAGCTCATGACCCAAGAGACCGTTGAAGCAGTCTGTGAGTTAATTCCCTCTGAGGAGAGGCACGAAGCTCTGAGGGAGCTGATGGACCTTTACCTTAAGATGAAGCCGGTGTGGCGATCATCGTGTCCTGCCAAAGAGTGCCCAGAATCTCTCTGCCAGTATAGCTTCAATTCACAGCGTTTTGCTGAGCTCCTCTCTACCAAGTTCAAGTATAGATATGAGGGCAAAATCACCAATTATTTTCACAAAACCCTGGCACA????GCCCATGTGCTGACCACCGGGGTGCAGAGCTCCTTGAATGACCCTCGCCTGGTCATCTCCTATGAGCCCAGCACCCTCCAGGCTCCCCAGCAAGCTTCAGCCCTCACCAACCTCACCCAAGAGGAACTGCTTGCCCGCTTGCAGAAGGGCATCCGCCACGAGGTTCTGGAGGGCAACGTGGGCTACTTGCGTGTGGACGACATCCCAGGCCAGGAGGTGGTGAGCAAGCTGGGGGCCTTCCTGGTTGCCAGCGTCTGGAGGAAGCTCATGGGCACCTCTGCCTTGGTGCTGGACCTCCGACACTGCACTGGGGGCCACATTTCTGGTATCCCCTACTTCATCTCCTACCTGCACCCAGGGAACACAGTCCTGCACGTGGATACCATCTACGACCGCCCCTCCAATACGACCACTGAGATCTGGACCCTGCCCCACGTCCTGGGAGAAAGGTACAGTGCGGACAAGGATGTGGTGGTCCTCACCAGCAGCCACACGGGGGGTGTGGCTGAGGACATCACTTACATCCTCAAACAGATGCGCAGAGCCATTGTGGTGGGCGAGCGGACTGGAGGGGGTGCCCTGGACCTCCAGAAGCTAAGGATAGGCCAGTCCGACTTCTTCCTCACCGTGCCCGTGTCCAGGTCTCTAGGGCCCTTGGGAGGGGGCAGCCAGACCTGGGAGGGCAGCGGGGTACTGCCCTGTGTGGGGACACCAGCGGAGCAGGCCCTAGAGAAAGCCCTGGCCATCCTCACTTTGCGCCGGGCCCTGCCTGGAGTCGTGCGGCGCCTGCAGGGGGCGCTCCAGGCCTACTACACACTGGTGGACCGCGTGCCCGCCCTGCTGCACCACCTGGCCAATATGGACTTCTCTGCGGTGGTCTCTGAGGAGGACCTGGTCGCGAAGCTCAACGCAGGTCTGCAGACTGCGTCCGAGGACCCCAGGCTCCTGGTGCGGGCCGTCAGTCCTAAGGAAACCTCTTTTGGGCCCGAGGTTGGAGAGGACGACCCTCCGGAGGTGGTCCCCACGGTGCCCGACAATGAGGCTGCCCGGCGAGCCCTAGTGGGCGCTATGTTCCAGGTGTCCGTGCTGCCCGGCAACGTGGGCTACCTCCGCTTTGACAGCTTTGCCAACGCCTCGGTGCTGGAGGCGCTGAGCCCCTACATCGTACGTCAGGTGTGGGGGCCCCTG00011100?00??1300?0?0?10?230210010001001?0030100011021?1000011002000000000000010?0000001?00013?0022012?01202????100010000002211????2111100000101100000100000?0000?0000000000001000000000?10100000?0000100210

Megalictis_sp ??????????????????????????????????????????????????????????????????????????????????????????????????????????????????????????????????????????????????????????????????????????????????????????????????????????????????????????????????????????????????????????????????????????????????????????????????????????????????????????????????????????????????????????????????????????????????????????????????????????????????????????????????????????????????????????????????????????????????????????????????????????????????????????????????????????????????????????????????????????????????????????????????????????????????????????????????????????????????????????????????????????????????????????????????????????????????????????????????????????????????????????????????????????????????????????????????????????????????????????????????????????????????????????????????????????????????????????????????????????????????????????????????????????????????????????????????????????????????????????????????????????????????????????????????????????????????????????????????????????????????????????????????????????????????????????????????????????????????????????????????????????????????????????????????????????????????????????????????????????????????????????????????????????????????????????????????????????????????????????????????????????????????????????????????????????????????????????????????????????????????????????????????????????????????????????????????????????????????????????????????????????????????????????????????????????????????????????????????????????????????????????????????????????????????????????????????????????????????????????????????????????????????????????????????????????????????????????????????????????????????????????????????????????????????????????????????????????????????????????????????????????????????????????????????????????????????????????????????????????????????????????????????????????????????????????????????????????????????????????????????????????????????????????????????????????????????????????????????????????????????????????????????????????????????????????????????????????????????????????????????????????????????????????????????????????????????????????????????????????????????????????????????????????????????????????????????????????????????????????????????????????????????????????????????????????????????????????????????????????????????????????????????????????????????????????????????????????????????????????????????????????????????????????????????????????????????????????????????????????????????????????????????????????????????????????????????????????????????????????????????????????????????????????????????????????????????????????????????????????????????????????????????????????????????????????????????????????????????????????????????????????????????????????????????????????????????????????????????????????????????????????????????????????????????????????????????????????????????????????????????????????????????????????????????????????????????????????????????????????????????????????????????????????????????????????????????????????????????????????????????????????????????????????????????????????????????????????????????????????????????????????????????????????????????????????????????????????????????????????????????????????????????????????????????????????????????????????????????????????????????????????????????????????????????????????????????????????????????????????????????????????????????????????????????????????????????????????????????????????????????????????????????????????????????????????????????????????????????????????????????????????????????????????????????????????????????????????????????????????????????????????????????????????????????????????????????????????????????????????????????????????????????????????????????????????????????????????????????????????????????????????????????????????????????????????????????????????????????????????????????????????????????????????????????????????????????????????????????????????????????????????????????????????????????????????????????????????????????????????????????????????????????????????????????????????????????????????????????????????????????????????????????????????????????????????????????????????????????????????????????????????????????????????????????????????????????????????????????????????????????????????????????????????????????????????????????????????????????????????????????????????????????????????????????????????????????????????????????????????????????????????????????????????????????????????????????????????????????????????????????????????????????????????????????????????????????????????????????????????????????????????????????????????????????????????????????????????????????????????????????????????????????????????????????????????????????????????????????????????????????????????????????????????????????????????????????????????????????????????????????????????????????????????????????????????????????????????????????????????????????????????????????????????????????????????????????????????????????????????????????????????????????????????????????????????????????????????????????????????????????????????????????????????????????????????????????????????????????????????????????????????????????????????????????????????????????????????????????????????????????????????????????????????????????????????????????????????????????????????????????????????????????????????????????????????????????????????????????????????????????????????????????????????????????????????????????????????????????????????????????????????????????????????????????????????????????000011000001??2?0?0?0?10?200?10000000????020?100?0102???010??0????00000??????010?0000001000100100020020110011210100000322?0111??0??20??????????1????00100000000?0?0????0???0001000?0?0000?1???000?0?????????

Mephitis_mephitis TGGTGCCCCCCACGGAAGGCCCCGGGAGCTCCACCACGCCGTACGTGGAGGATACCCCAGAGCCGCCCCTCCACGACTTCTACTGCAGCAAGCTTCTGGACCTGGTTTTCCTGCTCGATGGCTCCTCCAAGCTGTCTGAGGATGAGTTTGAGGTGCTGAAGGTCTTTGTGGTGGCTATGATGGAGCGCCTGCATATCTCCCAGAAGCGGATCCGTGTGGCTGTGGTGGAGTACCATGACGGCTCCCACGCCTACATTGAGCTCCAGGACCGGAAGCGACCCTCGGAGCTGCGGCGCATTGCCAGCCAGGTGAAGTACGTGGGCAGCAAGGTGGCCTCCACCAGYGAGGTCCTGAAGTACACACTGTTCCAGATCTTTGGCACTATCGACCGCCCCGAAGCATCCCGCATTGCCCTGCTCCTCATGGCTAGCCAGGAGCCCCCRAGGCTGGCCCGGAATTTGATTCGCTATGTGCAGGGCCTGAAGAAGAAGAAAGTCATCATGATCCCTGTGGGCATCGGGCCCCACGCCAACCTCAAGCAGATCCGCAACATCGAGAAGCAGGCCCCTGAGAACAAGGCCTTCGTGCTCAGCGGCGTGGGCGAGCTGGAGCAGCGAAGGGATGAGATTATCAGCTACCTCTGTGACCTTGCCCCCGAAGCACCCGCCCCTACTCAGCCCCGCCCTGTGGTGCCGGT-------GGTCCCG-------------TCYGACGATGGGGCCCA-AAGGAAATCCACGGTTCTGGATGTGGTGTTTGTCCTGGAAGGCTCAGACAAAATTGGCGAGGCCAACTTTAACAAGAGCAGGGAGTTCATGGAGGAGGTGATTCAGCGGATGGACGTGGGCCGGGATGGCATCCATGTCACGGTGCTGCAGTACTCCTACACCGTGGCCGTGGAGTACACCTTCAGTGAACCCCAGTCCAAGGGGGAGGTCCTGCAACATGTGCGGGAGATCCGATACCGGGGCGGCAACAGGACCAACACTGGGCGGGCCCTGCAGTACCTGTCTGAGCACAGCTTCTCGGTCAGACAGGGGGACCGGGAGCAGGTCCCTAACCTGGTCTACATGGTCACAGGAAACCCTGCCTCTGATGAGATCAAGCGGATGCCTGGAGACATCCAGGTGGTGCCCATCGGAGTGGGCCCTCACGCCGATGTRCAGGAGCTGGAGATAAAGACAGAATGAATGTAGAAAAGGCTGAGTTCTGTAATAAAAGCAAACAGCCTGGCTTAGCAAGGAGCCAACAGAGCAGATGGGCTGAAAGTAAGGAAATATGTCATGATAGGCAGACTCCCAGCACAGAGAGAAAGGTACTTCTGAATGGCGATCCCCTGTGTGGGAAAAAAGAACTGAAGAAGCAGAAACCTCCATGCTCTGACAGTCCTAGAGATTCCCAAGATGTTCCTTGGATAACATTGAATAGTAGCATACAGAAAGTTAACGAGTGGTTTTCCAGAAGTGATGAAATGTTAAGTTCT---GATGACTCACATGACGGGGGTTCCAAATCAAATACTATAGAGGCTGGTGCAGTAGAAGTTCCAAATGAAGTGGATGCATATTCTGGTTCTTCTGAGAAAATAGACTTAATGGCCAGTAATCCTCGGGAGGCTTTGCTCTGTGAAAGTGAAAGAGTCCACACCAAGTCAGTAGAAAATAATATTGAAGATAAAATATTTGGGAAAACCTACCGGAGGAAAGCACACCTCCCTAACATGAGCCATATGAATGAAGCTGTAATTATAGGAGCACATGCTATAGAACCTCAGACAACGCGAGCGCATCCCCTCACGGATAAAACAAAATGTAAAAAGAGAACTACATCAGGACTTCATCCTGAGGATTTTATCAAGAAAGTAGATTTGACTGTTGTTCCAAAGACTCCTGAAAAGCTAGTCGAGGGAACCGACAAAATCGAGCAAAGTGGTCATGTGATGAATATTACAAATAATGGTCTTGGCAATGAAACAAAAGGTAATTATGTTCAGACCAGGAAAAATGCTAACCCAACTGAATCATTGGAAGAAGAATCTGCTTTTCGAAGCAAAGCTGAACCGATAAGCAGCAGTATAAGCAATATGGAACTGGAATTAAATAGCTCCAGTTTGAAAGTCCCTAAGAAGAACAGGCTGAGGAGGAAGTCCTCCACCAGGCACACTTGTGCGCTCGAATTCATAGTCAATAGAAATCCAAGCCCACCTGATCATAGTGAACTACAGAACCATCAGAATTTCTCTGCTGGAAACAATGAGAACAGCGTTGAGGCCCACATAGGAATAAGTGGAGAAGCCAACCTGGATTTCCTCAACATTCCTTTGACAATTCCTGAGATGACTCTACCTTACACAATGCTCACAACTCCCCAGGTGAAAGATTTCTCCCTGTGGGAAAAAACAGGCTTGAAGGATTTCTTGAAGACCACAAAGCAATCATTTGATTTAAGTGTAAAGGCTCAGTATAAGAAAAACAAAGACAAGCACATCATCCCAGTTCCTTTTTATGCCAAAGACTTCCATGTATTGAGTACACCAAATGATATTTTCATTCCAGCCATGGGCAATATTACCTATGACTTTTCCTTTAAATCAGGCATCATCACACTGAACACCAATGTTGGACTGTATAACCAGTCAGATATTGTCGCTCATTTCCTAACTTCCTCTTCTGCTGTCACTGATGCACTACAGTACAAATTAGAGGGCACCTCAAGTTTGACAAGGAAAAGAGGCTTGAAGCTGGCCACAGCCTTGTCTCTGAGTAATAAATTCGTAGAAGGAAATCATGACAGTACTATTAGTTGGACCAAGAAAAATATGGAGGCATCAGTGACAACATCAGCAAAAGTCCAAATTCCAATTTTGAGAATGAATTTCAAGCAAGAACTTAATGGAAATACCAAGTCGAAGCCTACTGTCTCTTCATTCGTTGAATTAATGTATGATCTCAATTCCCCTGAACTGCACTCTACTGCAACAGGGATAATCAACCACAAACTCAACTTGGAAAGCCTCACCTCTTACTTTTCTGTTGAGTCATCTACCAAAGGGGATATCAAGGGCTCAGTACTTTCAAGGGAATACTCAGGAACTATTGCCAGTGAGGCCAGCACTTACTTGAATTCCAAGAGTACTCGGTCTTCAGTGAAGCTGCAAGGGGCTTCCAAAGTTGATGGTATCTGGAATCCATGAGAGCCCAAGACCTTGATGATTACCTGAATGGCCCCTTCACTGTCGTGGTGAAGGAGTCTTGTGACGGAATGGGAGATGTGAGCGAGAAGCATGGGAGCGGGCCGGCAGTTCCCGAAAAGGCAGTTCGGTTTTCGTTCACGGTCATGAAAATTACTATAGCACATGGCTCAGAAAACGTGAAGGTGTTTGAAGAAGCCAAACCCAACTCCGAACTGTGTTGTAAGCCCCTGTGCCTCATGTTGGCAGATGAGTCTGACCACGAGACCCTGACGGCCATCCTCAGCCCTCTCATTGCTGAGAGGGAGGCCATGAAGAGCAGCCAATTAATGCTTGAGATGGGAGGCATCCTTCGGAGTTTCAAGTTTATCTTCAGGGGCACCGGATATGATGAGAAACTTGTTCGGGAAGTCGAAGGCCTCGAGGCTTCTGGCTCAGTCTACATTTGCACTCTTTGTGATGCCACCCGCCTGGAAGCATCTCAAAATCTCGTCTTCCACTCCATCACCAGAAGCCACTCTGAGAACCTGGAGCGCTATGAGGTCTGGCGTTCTAACCCGTACCACGAGTCCGTGGAAGAACTGCGGGATCGGGTGAAAGGGGTCTCATCGAAACCTTTCATCGAGACGGTCCCTTCCATTGATGCACTCCACTGCGATATTGGCAATGCAGCTGAGTTCTACAAGATTTTCCAGCTAGAGATAGGGGAGGTGTATAAGAATCCCAGTGCCTCCAAAGAAGAAAGGAAAAGATGGCAGGCAACGTTGGACAAGCATCTCCGGAAGAAGATGAACCTGAAACCGATCATGAGGATGAATGGCAACTTTGCCAGGAAACTCATGACCAAAGAGACAGTTGAAGCAGTTTGTGAATTAATTCCTTCTGAGGAGAGGCACGAAGCTCTGAGGGAGCTGATGGACCTTTACCTTAAGATGAAGCCTGTATGGCGATCATCATGTCCTGCCAAAGAGTGCCCAGAATCTCTCTGCCAGTATAGTTTCAATTCACAGCGTTTCGCTGAGCTCCTGTCTACCAAGTTCAAGTACAGATATGAGGGCAAAATCACCAATTATTTTCACAAAACCCTGGCACA????GCCCATGTGCTGACCACCGGGGTGCAGAGCTCCTTGAACGACCCTCGCCTGGTCATCTCCTATGAGCCCAGCACCCTCAAGTCTCCCCGGCAAGCCCCAGCCCTCACCAACCTCACCCAAGAGGAGCTACTTGCCTGCTTGCAGAAAGGCATCCGCCATGAGGTTCTGGAGGGCAATGTGGGCTACCTGCGTGTGGACGACATCCCAGGCCAGGAGGTAGTGAGCAAGTTAGGGGGCTTCCTGGTGGCCAGCATCTGGAGGAAGCTCATGGGCACCTCGGCCTTGGTGCTGGACCTCCGGCACTGCACTGGGGGTCACATTTCTGGTATCCCCTATGTCATCTCCTACCTGCACCCGGGGGACACGGTCCTGCACGTGGATACCATCTACAACCGCCCCTCCAATACAACCACTGAGATCTGGACCCTGCCCCAGGTCCTAGGAGAAAGGTACAGTGCCGACAAGGATGTGGTGGTCCTCACCAGTGGCCACACGGGGGGAGTGGCTGAGGACATCACTTACATCCTCAAACAGATGCGCAGGGCCATCGTGGTGGGTGAGCGGACGGTRGGGGGCGCCCTGGACCTCCAGAAGCTGAGGATAGGCCAGTCTGATTTTTTTCTCACTGTGCCTGTATCTAGATCCCTAGGGCCTCTGGGAGGGGGCAGCCAGACATGGGAGGGCAGCGGGGTGCTGCCGTGTGTGGGGACACCAGCTGAGCAGGCCCTCGAGAAAGCCCTGGCTATCCTCACCCTGCGCCGGGCGCTGCCTGGAGTGGTGTGGCGCCTGCAGGAGGCGCTGCAGGCCTACTACACGCTGGTGGACCGTGTGCCCACCCTGCTGCATCACCTGGCCAACATGGACTTCTCTGCAGTGGTCTCCGAGGAGGACCTGATCGCGAGGCTCAACACAGGTCTGCAGACTGCGTCTGAAGACCCCAGGCTCCTGGTGCGGGCCATCAGACCCAAGGAAACCTCTTCTGGGCCTGAGGCTGGAGACAACGACCCTCTGGAGGTGGTCCCCACGGTGCCCGAGGATGAGGCTGCCCGGCGGGCCCTGGTGGGCTCTACGTTCCAGGTGTCCGTGCTGCCAGGCAACGTGGGCTACCTCCGCTTCGACAGCTTTGCCGACGCCTCGGTGCTAGAGGTGCTGAGCCCCTACATCATGCATCAGGTGTGGGGCCCCCTG0001020010001?20000?0?10?001310010000010002021100010201100000000000000000001?0101010000100001720002010000002????100010000102211?01321?0000030001?00010100?000000000000000000?0000?00000000111000010000?00201

Mirounga_angustirostris ??????????????????????????????????????????????????????????????????????????????????????????????????????????????????????????????????????????????????????????????????????????????????????????????????????????????????????????????????????????????????????????????????????????????????????????????????????????????????????????????????????????????????????????????????????????????????????????????????????????????????????????????????????????????????????????????????????????????????????????????????????????????????????????????????????????????????????????????????????????????????????????????????????????????????????????????????????????????????????????????????????????????????????????????????????????????????????????????????????????????????????????????????????????????????????????????????????????????????????????????????????????????????????????????????????????????????????????????????????????????????????????????????????????????????????????????????????????????????????????????????????????????????????????????????????????????????????????????????????????????????????????????????????????????????????????????????????????????????????????????????????????????????????????????????????????????????????????????????????????????????????????????????????????????????????????????????????????????????????????????????????????????????????????????????????????????????????????????????????????????????????????????????????????????????????????????????????????????????????????????????????????????????????????????????????????????????????????????????????????????????????????????????????????????????????????????????????????????????????????????????????????????????????????????????????????????????????????????????????????????????????????????????????????????????????????????????????????????????????????????????????????????????????????????????????????????????????????????????????????????????????????????????????????????????????????????????????????????????????????????????????????????????????????????????????????????????????????????????????????????????????????????????????????????????????????????????????????????????????????????????????????????????????????????????????????????????????????????????????????????????????????????????????????????????????????????????????????????????????????????????????????????????????????????????????????????????????????????????????????????????????????????????????????????????????????????????????????????????????????????????????????????????????????????????????????????????????????????????????????????????????????????????????????????????????????????????????????????????????????????????????????????????????????????????????????????????????????????????????????????????????????????????????????????????????????????????????????????????????????????????????????????????????????????????????????????????????????????????????????????????????????????????????????????????????????????????????????????????????????????????????????????????????????????????????????????????????????????????????????????????????????????????????????????????????????????????????????????????????????????????????????????????????????????????????????????????????????????????????????????????????????????????????????????????????????????????????????????????????????????????????????????????????????????????????????????????????????????????????????????????????????????????????????????????????????????????????????????????????????????????????????????????????????????????????????????????????????????????????????????????????????????????????????????????????????????????????????????????????????????????????????????????????????????????????????????????????????????????????????????????????????????????????????????????????????????????????????????????????????????????????????????????????????????????????????????????????????????????????????????????????????????????????????????????????????????????????????????????????????????????????????????????????????????????????????????????????????????????????????????????????????????????????????????????????????????????????????????????????????????????????????????????????????????????????????????????????????????????????????????????????????????????????????????????????????????????????????????????????????????????????????????????????????????????????????????????????????????????????????????????????????????????????????????????????????????????????????????GCCCATGTGCTGACCACGGGGGTGCAGAGCTCCTTGAACGACCCTCGCCTGGTCATCTCATATGAGCCCAGCACCCTTGAGGCTCCCCGGCAAGCCCCAGCACTCACCAACCTCACACAAGAGGAACAGCTTGCCCGGTTGCAGAAGGGCATCCGCCACGAGGTTCTGGAGGGCAATGTGGGCTACCTGCGTATGGACGACATCCCAGGCCAGGAGGTGGTGAGCAAGCTGGGGGGCTTCCTGGTGACCAGCGTCTGGAGGGAGCTCATGGGCACCTCTGCCTTGGTGCTGGACCTCCGGCACTGCACTGGGGGCCATATTTCCGGCATCCCCTACGTCATCTCCTACCTACACCCAGGGAACACAGTCCTGCACGTGGATACCATCTACAACCGCCCCTCCAATACAACCACTGAGATCTGGACCCTGCCCCAGGTCCTAGGAGAAAGGTACAGTGCCGACAAGGATGTGGTGGTCCTCACCAGCGGCCACACGGGGGGCGTGGCTGAGGACATCACTTACATCCTCAAACAGATGCGCAGGGCCATCGTGGTGGGTGAGCGGACTGTGGGGGGTGCCCTGGACCTCCAGAAGCTGCGGATTGGCCAGTCCGACTTCTTCCTCACTGTGCCTGTGTCCAGGTCCCTAGGGCCCCTGGGAGGAGGCAGCCAGACATGGGAGGGCAGCGGGGTGCTGCCCTGTGTGGGGACACCAGCAGAGCAGGCGCTCGAGAAAGCCCTGGCCATCCTCACTCTGCGCCGGGCCCTGCCAGGAGTTGTGCAGCGCCTGCAGGAGGCGCTGCAGGCCTACTACACGCTGGTGGACCGCGTGCCCACCCTGCTGCACCACCTGGCCAACATGGACTTCTCTGCGGTGGTCTCCGAGGAGGACTTGGTCACGAAGCTCAACACTGGTCTACAGACTGCGTCTGAGGACCCCAGGCTCCTGGTGCGGGCCGTCAGGCCCAAGGAAACCCTTTCTGGGCCTGAGGTCGGAGACGCTGACCCTCCGGAGGTGGTCCCCACAGTGGCCGAGGATGAGGCTGTCCGGCGGGCCCTGGTGGACTCTATGTTCCAGGTGTCCGTGCTGCCGGGCAACGTGGGCTACCTCCGCTTTGACAGCTTTGCCGACGCCTCGGTGCTGGAGGTGCTGAGCCCATACATCGTGCAGCAGGTGTGGGAGC?????000112003011023130112210111?313111100????000?10102112??002002010121011???????01100010100000015033120?212?122????110101002?1?02?????2?01??????000110111112102201???????2011112101013101012011100011100???????

Monachus_monachus ??????????????????????????????????????????????????????????????????????????????????????????????????????????????????????????????????????????????????????????????????????????????????????????????????????????????????????????????????????????????????????????????????????????????????????????????????????????????????????????????????????????????????????????????????????????????????????????????????????????????????????????????????????????????????????????????????????????????????????????????????????????????????????????????????????????????????????????????????????????????????????????????????????????????????????????????????????????????????????????????????????????????????????????????????????????????????????????????????????????????????????????????????????????????????????????????????????????????????????????????????????????????????????????????????????????????????????????????????????????????????????????????????????????????????????????????????????????????????????????????????????????????????????????????????????????????????????????????????????????????????????????????????????????????????????????????????????????????????????????????????????????????????????????????????????????????????????????????????????????????????????????????????????????????????????????????????????????????????????????????????????????????????????????????????????????????????????????????????????????????????????????????????????????????????????????????????????????????????????????????????????????????????????????????????????????????????????????????????????????????????????????????????????????????????????????????????????????????????????????????????????????????????????????????????????????????????????????????????????????????????????????????????????????????????????????????????????????????????????????????????????????????????????????????????????????????????????????????????????????????????????????????????????????????????????????????????????????????????????????????????????????????????????????????????????????????????????????????????????????????????????????????????????????????????????????????????????????????????????????????????????????????????????????????????????????????????????????????????????????????????????????????????????????????????????????????????????????????????????????????????????????????????????????????????????????????????????????????????????????????????????????????????????????????????????????????????????????????????????????????????????????????????????????????????????????????????????????????????????????????????????????????????????????????????????????????????????????????????????????????????????????????????????????????????????????????????????????????????????????????????????????????????????????????????????????????????????????????????????????????????????????????????????????????????????????????????????????????????????????????????????????????????????????????????????????????????????????????????????????????????????????????????????????????????????????????????????????????????????????????????????????????????????????????????????????????????????????????????????????????????????????????????????????????????????????????????????????????????????????????????????????????????????????????????????????????????????????????????????????????????????????????????????????????????????????????????????????????????????????????????????????????????????????????????????????????????????????????????????????????????????????????????????????????????????????????????????????????????????????????????????????????????????????????????????????????????????????????????????????????????????????????????????????????????????????????????????????????????????????????????????????????????????????????????????????????????????????????????????????????????????????????????????????????????????????????????????????????????????????????????????????????????????????????????????????????????????????????????????????????????????????????????????????????????????????????????????????????????????????????????????????????????????????????????????????????????????????????????????????????????????????????????????????????????????????????????????????????????????????????????????????????????????????????????????????????????????????????????????????????????????????????????????????????????????????????????????????????????????????????????????????????????????????????????????????????????????????????GCCCATGTGCTGACCACGGGGGTGCAGAGCTCCTTGAACGACCCTCGCCTGGTCATCTCATATGAGCCCAGCACCCTTGAGGCTCCCCGGCAAGCCCCAGCACTCACCAACCTCACACAAGAGGAACAGCTTGCCCGGTTGCAGAAGGGCATCCGCCACGAGGTTCTGGAGGGCAATGTGGGCTACCTGCGTATGGACGACATCCCAGGCCAGGAGGTGGTGAGCAAGCTGGGGGGCTTCCTGGTGACCAGCGTCTGGAGGGAGCTCATGGGCACCTCTGCCTTGGTGCTGGACCTCCGGCACTGCACTGGGGGCCATATTTCCGGCATCCCCTACGTCATCTCCTACCTACACCCAGGGAACACAGTCCTGCACGTGGATACCATCTACAACCGCCCCTCCAATACAACCACTGAGATCTGGACCCTGCCCCAGGTCCTAGGAGAAAGGTACAGTGCCGACAAGGATGTGGTGGTCCTCACCAGCGGCCACACGGGGGGTGTGGCTGAGGACATCACTTACATCCTCAAACAGATGCGCAGGGCCATCGTGGTGGGTGAGCGGACTGTGGGGGGTGCCCTGGACCTCCAGAAGCTGCGGATAGGCCAGTCCGACTTCTTCCTCACTGTGCCTGTGTCCAGGTCCCTAGGGCCCCTGGGAGGAGGCAGCCAGACATGGGAGGGCAGCGGGGTGCTGCCCTGTGTGGGGACACCAGCAGAGCAGGCGCTCGAGAAAGCCCTGGCCATCCTCACTCTGCGCCGGGCCCTGCCAGGAGTCGTGCAGCGCCTGCAGGAGGCGCTGCAGGCCTACTACACGCTGGTGGACCGCGTGCCCACCCTGCTGCACCACCTGGCCAACATGGACTTCTCTGCGGTGGTCTCCGAGGAGGACCTGGTCACGAAGCTCAACGCTGGTCTACAGACTGCGTCTGAGGACCCCAGGCTCCTGGTGCGGGCCGTCAGGCCCAAGGAAACCCTTTCTGGGCCTGAGGTCGGAGACGCTGACCCTCCGGAGGTGGTCCCCACAGTGGCCGAGGATGAGGCTGTCCGGCGGGCCCTGGTGGACTCTATGTTCCAGGTGTCCGTGCTGCCGGGCAACGTGGGCTACCTCCGCTTTGACAGCTTTGCCGACGCCTCGGTGCTGGAGGTGCTGAGCCCATACATCGTGCAGCAGGTGT???????????0021120030100230300102(0 1)01110313112100?0?40003200?20120101201211012101111?122101000010000000115123120?212?112????110001411?1102?????2101?111010001101111121022?1111?101211111211101310(0 1)01211110001110000?0000

Mustelavus_priscus ??????????????????????????????????????????????????????????????????????????????????????????????????????????????????????????????????????????????????????????????????????????????????????????????????????????????????????????????????????????????????????????????????????????????????????????????????????????????????????????????????????????????????????????????????????????????????????????????????????????????????????????????????????????????????????????????????????????????????????????????????????????????????????????????????????????????????????????????????????????????????????????????????????????????????????????????????????????????????????????????????????????????????????????????????????????????????????????????????????????????????????????????????????????????????????????????????????????????????????????????????????????????????????????????????????????????????????????????????????????????????????????????????????????????????????????????????????????????????????????????????????????????????????????????????????????????????????????????????????????????????????????????????????????????????????????????????????????????????????????????????????????????????????????????????????????????????????????????????????????????????????????????????????????????????????????????????????????????????????????????????????????????????????????????????????????????????????????????????????????????????????????????????????????????????????????????????????????????????????????????????????????????????????????????????????????????????????????????????????????????????????????????????????????????????????????????????????????????????????????????????????????????????????????????????????????????????????????????????????????????????????????????????????????????????????????????????????????????????????????????????????????????????????????????????????????????????????????????????????????????????????????????????????????????????????????????????????????????????????????????????????????????????????????????????????????????????????????????????????????????????????????????????????????????????????????????????????????????????????????????????????????????????????????????????????????????????????????????????????????????????????????????????????????????????????????????????????????????????????????????????????????????????????????????????????????????????????????????????????????????????????????????????????????????????????????????????????????????????????????????????????????????????????????????????????????????????????????????????????????????????????????????????????????????????????????????????????????????????????????????????????????????????????????????????????????????????????????????????????????????????????????????????????????????????????????????????????????????????????????????????????????????????????????????????????????????????????????????????????????????????????????????????????????????????????????????????????????????????????????????????????????????????????????????????????????????????????????????????????????????????????????????????????????????????????????????????????????????????????????????????????????????????????????????????????????????????????????????????????????????????????????????????????????????????????????????????????????????????????????????????????????????????????????????????????????????????????????????????????????????????????????????????????????????????????????????????????????????????????????????????????????????????????????????????????????????????????????????????????????????????????????????????????????????????????????????????????????????????????????????????????????????????????????????????????????????????????????????????????????????????????????????????????????????????????????????????????????????????????????????????????????????????????????????????????????????????????????????????????????????????????????????????????????????????????????????????????????????????????????????????????????????????????????????????????????????????????????????????????????????????????????????????????????????????????????????????????????????????????????????????????????????????????????????????????????????????????????????????????????????????????????????????????????????????????????????????????????????????????????????????????????????????????????????????????????????????????????????????????????????????????????????????????????????????????????????????????????????????????????????????????????????????????????????????????????????????????????????????????????????????????????????????????????????????????????????????????????????????????????????????????????????????????????????????????????????????????????????????????????????????????????????????????????????????????????????????????????????????????????????????????????????????????????????????????????????????????????????????????????????????????????????????????????????????????????????????????????????????????????????????????????????????????????????????????????????????????????????????????????????????????????????????????????????????????????????????????????????????????????????????????????????????????????????????????????????????????????????????????????????????????????????????????????????????????????????????????????????????????????????????????????????????????????????????????????????????????????????????????????????????????????????????????????????????????????????????????????????????????????????????????????????????????????????????????????????????????????????????????????????????????????????????????????????????????????????????????????????????????????????????????????????????????????????????????????????????000?11?0?00?????0?0????????0?000?000?????000?1?0??000????????0??????000??????01000????000?0100000000000100010???1?0?005100??00101?22????????????????????????????????????????????????????????????????????????

Neotherium_mirum ??????????????????????????????????????????????????????????????????????????????????????????????????????????????????????????????????????????????????????????????????????????????????????????????????????????????????????????????????????????????????????????????????????????????????????????????????????????????????????????????????????????????????????????????????????????????????????????????????????????????????????????????????????????????????????????????????????????????????????????????????????????????????????????????????????????????????????????????????????????????????????????????????????????????????????????????????????????????????????????????????????????????????????????????????????????????????????????????????????????????????????????????????????????????????????????????????????????????????????????????????????????????????????????????????????????????????????????????????????????????????????????????????????????????????????????????????????????????????????????????????????????????????????????????????????????????????????????????????????????????????????????????????????????????????????????????????????????????????????????????????????????????????????????????????????????????????????????????????????????????????????????????????????????????????????????????????????????????????????????????????????????????????????????????????????????????????????????????????????????????????????????????????????????????????????????????????????????????????????????????????????????????????????????????????????????????????????????????????????????????????????????????????????????????????????????????????????????????????????????????????????????????????????????????????????????????????????????????????????????????????????????????????????????????????????????????????????????????????????????????????????????????????????????????????????????????????????????????????????????????????????????????????????????????????????????????????????????????????????????????????????????????????????????????????????????????????????????????????????????????????????????????????????????????????????????????????????????????????????????????????????????????????????????????????????????????????????????????????????????????????????????????????????????????????????????????????????????????????????????????????????????????????????????????????????????????????????????????????????????????????????????????????????????????????????????????????????????????????????????????????????????????????????????????????????????????????????????????????????????????????????????????????????????????????????????????????????????????????????????????????????????????????????????????????????????????????????????????????????????????????????????????????????????????????????????????????????????????????????????????????????????????????????????????????????????????????????????????????????????????????????????????????????????????????????????????????????????????????????????????????????????????????????????????????????????????????????????????????????????????????????????????????????????????????????????????????????????????????????????????????????????????????????????????????????????????????????????????????????????????????????????????????????????????????????????????????????????????????????????????????????????????????????????????????????????????????????????????????????????????????????????????????????????????????????????????????????????????????????????????????????????????????????????????????????????????????????????????????????????????????????????????????????????????????????????????????????????????????????????????????????????????????????????????????????????????????????????????????????????????????????????????????????????????????????????????????????????????????????????????????????????????????????????????????????????????????????????????????????????????????????????????????????????????????????????????????????????????????????????????????????????????????????????????????????????????????????????????????????????????????????????????????????????????????????????????????????????????????????????????????????????????????????????????????????????????????????????????????????????????????????????????????????????????????????????????????????????????????????????????????????????????????????????????????????????????????????????????????????????????????????????????????????????????????????????????????????????????????????????????????????????????????????????????????????????????????????????????????????????????????????????????????????????????????????????????????????????????????????????????????????????????????????????????????????????????????????????????????????????????????????????????????????????????????????????????????????????????????????????????????????????????????????????????????????????????????????????????????????????????????????????????????????????????????????????????????????????????????????????????????????????????????????????????????????????????????????????????????????????????????????????????????????????????????????????????????????????????????????????????????????????????????????????????????????????????????????????????????????????????????????????????????????????????????????????????????????????????????????????????????????????????????????????????????????????????????????????????????????????????????????????????????????????????????????????????????????????????????????????????????????????????????????????????????????????????????????????????????????????????????????????????????????????????????????????????????????????????????????????????????????????????????????????????????????????????????00211??002110?3?13111???0310?02?10?10????11031?0?1000????????1?1?1???????????01120?0?1001????2012??????????1????11000???1??1???????2??????????????????????13????????????????????????????10101010?0011???10??

Neovison_vison TGGTGCCCCCCACGGAAGGCCCCGTTGGCTCTCCCACCCCGTACGTGGAGGACACCCCCGAGCCGCCCCTCCACGACTTCTACTGCAGCCGGCTTCTGGACCTGGTTTTCCTGCTAGACGGCTCCTCTAAGCTGTCTGAGGGCGAGTTCCAAGTGCTGAAGGTCTTTGTGGTGGGCATGATGGAGCGTCTGCACATCTCCCAGAAGCGCATCCGCGTGGCCGTCGTGGAGTACCACGAAGGCTCCCACGCCTACCTTGAGCTCCAGGACCGGAAGCGGCCCTCGGAGCTGCGGCGCATCGCCAGCCAAGTGAGGTACGTGGGCAGCGAGGTGGCCTCCACCAGCGAGGTCCTCAAGTACACGCTGTTCCAGATCTTCGGCAAGATCGACCGCCCCGAAGCGTCCCGCATYGCCCTGCTCCTCACGGCCAGCCAGCAGCCCCCGAAGCTGGCCCGCAATCTGGTCCGCTATGTGCAGGGCCTGAAGAAGAAGAAAGTCATCGTGATCCCCGTGGGCATCGGGCCCCACATCAACCTCAAGCAGATCCGCAACATCGAGAAGCAGGCCCCCGAGAACAAGGCCTTCGTGCTCAGCGGTGTGGACGAGCTGGAGCAGCGGAGGGACGAGATTATCAGCTACCTGTGTGACCTGGCCCCCGAAGCACCCCGCCCTACCCAGCAGCCCCCTGTGTTGCCGGTCACTGTGGGTCCGGAGCTCTTGGGGGCCCCATCGTCGGGACCCAGCAGGAACTCCATGGTTCTGGATGTGGTGTTCCTCTTGGAAGGCTCAGACAAAATTGGAGAGGCCAACTTCAACAAGAGCAGGGACTTCATGGAGGAGGTGATCCGGCGGATGGACGTGAGCCAGGACGGCGTCCATGTCACGGTGCTGCAGTACTCCTACGCCGTGGCCGTGGAGTACACCTTCAGTGAGGCCCAGTCCAAGGGTGAGGTCCTGCAGCACGTGCGGGAGATCCGATTCCGGGGCGGCAACGGGACCAACACTGGGCTGGCCCTGCAGTACTTGTCTGAGCACAGCTTCTCCGTCAGCCAGGGGGACCGGGAGCAGGTCCCTAACCTGGTCTACATGGTCACGGGAAACCCCGCCTCTGATGAGATCAAGCGGATGCCTGGAGACATCCAGGTGGTGCCCATCGGAGTGGGCCCTCACGCCGACCCGCAGGAGCTGGAGATAAAGACAGAATGAATGTAGAAAAGGCTGAATTCTGTAATAAAAGCAAACAGCCTGCCTTAGCAAGGAGCCAACAGAGCAGATGGGTCGAAAGTAAGGAAACATGTAATGATAGGCAGACTCCCAGCACAGAGAGAAAGGTACTTCTGAAAGCTGATCCCCTGTGTGGGAGAAGAGAACCGAAGAAGCAGAAACCTCTAGGCTCTGACAGTCCTAGAGATTCCCAAGATGTTCCTTGGATAACACTGAATAGTAGCATACAGAAAGTGAATGAGTGGTTTTCCAGAAGCGATGAAATGTCAACTTCTGATGATGACTCACATGACGGGGGATCTGAATCGAGGACCGAAGTAGCTGGTGCAGTAGAAGTTCCAAACGAAGTGCACGGATGTTCCGGTTCCTCTGAGAAAATAGACTTAATGGCCAGCGAGCCTCAGGATGCTCTGATACGTGAACGCGAAAGAGTCCACACCAAGTCCGTAGAGAGTAACATCGAAGATAAAATATTTGGGAAAACCTACCGGAGGAAGGCAAGCCTCCTTAACGTGAGCCACATGAGCGAAGATCTGCTTATAGGAGTGTGTGCTGTAGAACCTCAGACAGTGCAAGCCCACCCCCTCACGAGTAAAGCAAAGCATAAACGGAGAACTACAGCAGGCCTTCATCCTGAGGATTTTATCAAGAAAGTAGATCTGGCCATCGTTCCAAAGACTCCTGAAAAGCTAGTTGAGGGAACCGACCAACTCGAGCGAAGTGGTCACGTGACGAAGATTAGAAATAATGGTCCCGAGGATGAAATAAAAGGTGATTGTGTTCAGACCGAGAGAAATGCTAACCCAACAGAATCCCTGGAAAAAGAATCTGCTTTCAGAAGCAGAGCTGAACCGATAAGCAGCAGTATAACCAAGATGGAACTGGAATTAAATAGCTCCGGTTTGAAAGCCCTTAAGAAGAACAGGCTGCGGAGGAAGTCCTCCACCAGGCACGGCTGTGCGCTTGAATTCGTAGTCAGTCGAAATCCAAGCCCGCCTGATCGCAGTGAACTGCAGAACCATCAGAATTTCTCTGCTGGAAACAATGAGAACAGCATTGAGGCCCACATAGGAATAAATGGAGAAGCCAACCTGGATTTCCTTAACATTCCTTTGACGATTCCTGAAATGACTCTACCTTACACATCACTCACAACTCCCCAGGTGAAAGATTTCTCCCTTTGGGAAAAAACAGGCTTGAAGGATTTCTTGAAGACAACAAAGCAATCATTTGATTTAAGTGTAAAGGCTCAGTATAAGAAAAACAAAGACGAGCACATCATCCCAATTCCTTTTTATGCAAAAGATTTCCAGGTACTGAGTACCCCAAATGATATTTTCATTCCAGCCATGGGCAATATTACCTATGACTTTTCCTTTAAGTCAGTCCTCATCACGCTGAATACCAATGTTGGACTGTATAACCAGTCAGATATTGTTGCTTATTTCCTAACTTCCTCTTCTTCTGTCACTGATGCTCTGCAGTACAAATTAGAGGGCACCACGAGTTTGACGAGGAAAAGAGGTTTGAAGCTAGCCACAGCTTTGTCTCTGAGTAATAAATTTATGGAAGGAAATCATGACAGTACTTTTAGTTTGACCAAGAAAAACATGGAGGCATCAGTGACAACATCTGCAGAAGTCCAAATTCCTATTTTGAGAATGAAATTCAAGCAAGAACTTAATGGAAATACCAAGTCGAAGCCTACTGTCTCTTCATCCATTGAATTAATATATGATCTCAAT---------------TCTACTGCTACAGGAACAATCAACCACAAACTCAACTTAGAGAGCCTCACCTCTTACTTTTACATTGAGTCATCTACCAAAGGAGATATCAAGGGCTCAGTACTTTCATTAGAATATTCAGGAACTATTGACAGCGAAGCCAGTACTTACTTGAATTCCAAGAGTACTCGGTCTTCAGTGAAGCTGCAAGGGGCTTCCAAAGTTGATGGTATCTGGAACCCATGAGAGCCCAAGACCTTGATGACTACCTCACCGGCCCCTTCACCGTCGTGGTGAAGGAGTCTTGCGACGGAATGGGAGACGTGAGCGAGAAGCACGGCAGCGGGCCCGTGGTTCCAGAAAAGGCCGTTCGGTTTTCGTTCACGGTCATGAAAATTACGATAGCACGTGGCTCTGAACATGTGAAGGTGTTTGAAGAAGTCAAACCCAACTCCGAACTGTGCTGTAAGCCCCTGTGTCTCATGCTGGCAGATGAGTCTGACCACGAGACCCTGACGGCCATCCTGAGCCCTCTCATTGCTGAGAGGGAGGCCATGAAGAGCAGCCAATTAATGCTTGAGATGGGAGGCATCCTTCGGAGTTTCAAGTTCATCTTCAGGGGCACCGGCTACGATGAGAAGCTCGTGCGGGAAGTCGAAGGCCTCGAGGCTTCTGGCTCAGTCTACATTTGTACCCTTTGTGACGCCACCCGCCTAGAAGCGTCTCAAAATCTCGTCTTCCACTCCATCACCAGAAGCCACTCCGAGAACCTGGAGCGCTATGAGGTGTGGCGTTCTAACCCGTACCACGAGTCCGTGGAAGAGCTGCGGGACCGGGTGAAGGGGGTCTCATCGAAACCATTCATCGAGACGGTCCCTTCCATCGATGCGCTCCACTGTGACATTGGCAATGCAGCCGAGTTCTACAAGATTTTCCAGCTAGAGATAGGGGAGGTGTACAAGAATCCCAACGCCTCCAAAGAGGAAAGGAAGAGATGGCAAGCTACGTTGGACAAGCATCTCCGGAAGAAGATGAACCTGAAACCGATCATGAGGATGAACGGCAACTTTGCCAGGAAGCTCATGACCAAAGAGACCGTTGAAGCAGTCTGTGAGTTAATTCCCTCTGAGGAGAGACACGAAGCTCTGAGGGAGCTGATGGACCTTTACCTGAAGATGAAGCCTGTGTGGCGATCATCTTGTCCTGCCAAAGAGTGCCCCGAATCTCTCTGCCAGTATAGCTTCAATTCACAGCGTTTTGCTGAGCTCCTCTCTACCAAGTTCAAGTATAGATATGAGGGCAAAATCACCAATTATTTTCACAAAACCCTGGCACA????GCCCATGTGCTGACCACCGGGGTGCAGAGCTCCTTGAATGACCCTCGCCTGGTCATCTCCTATGAGCCCAGCACCCTCCAGGCTCCCCGGCAAGCTCCAGCCCTCACCAACCTCACCCAAGAGGAACTGCTTGCCCGCTTGCAGAAGGGCATCCGCCACGAGGTTCTGGAGGGCAACGTGGGCTACTTGCGTGTGGACGACATCCCAGGCCAGGAGGTGGTGAGCAAGCTGGGGAGCTTCCTGGTGGCCAGCGTCTGGAGGAAGCTCATGGGCACCTCTGCCTTGGTGCTGGACCTCCGACACTGCACTGGGGGCCACATTTCTGGTATCCCCTACTTCATCTCCTACCTGCACCCAGGGAACACAGTCCTGCACGTGGATACCATCTACGACCGCCCCTCCAATACAACCACTGAGATCTGGACCCTGCCCCAGGTCCTGGGAGAAAGGTACAGTGCGGACAAGGATGTGGTGGTCCTCACCAGTGGCCACACAGGGGGTGTGGCTGAGGACATCACTTACATCCTCAAACAGATGCGCAGAGCCATTGTGGTGGGCGAGCGGACTGTGGGGGGTGCCCTTGACCTCCAGAAGCTAAGGATAGGCCAGTCCGACTTCTTCCTCACCGTGCCCGTGTCCAGATCTCTAGGGCCTTTGGGAGGGGGCAGCCAGACCTGGGAGGGCAGCGGGGTACTGCCCTGTGTGGGGACACCAGCGGAGCAGGCCCTAGAGAAAGCCCTGGCCATCCTCACTTTGCGTCGGGCCCTGCCTGGAGTGGTGCGGCGCCTGCAGGGGGCGCTCCAGGCCTACTACACCTTGGTGGACCGCGTGCCCGCTCTGCTGCACCACCTGGCCAATATGGACTTCTCTGCGGTGGTCTCTGAGGAGGACCTGGTCGCGAAGCTCAACGCAGGTCTGCAGACTGCGTCCGAGGACCCCAGGCTCCTGGTGCGGGCCGTCAGGACCAAGGAAAC---TACTGGGCCTGAAGTTGGAGAGGACGACCCTCCGGAGGTGGTCCCCACGGTGCCCGACAATGAGGCTGCCCGGCGAGCCCTAGTGGGCGCTATGTTCCAGGTGTCGGTGCTGCCCGGCAACGTGGGCTACCTCCGCTTTGACAGCTTTGCCAACGCCTCGGTGCTGGAGGCGCTGAGCCCCTACATCATGAGTCAGGTGTGGGGGCCCCTG00111?000001?12?000?0?1?1?31310010001?0000030100001011??010?0?00?0000000000?0010000?0001?0001000002002?01202????100?10000000?11??1?21?010?0000011000001001000000?00?0000000010100000000000011000000000100210

Odobenus_rosmarus TGGTGGCCCCCACGGAAGGCCCCATTGCCTCCACCACCCCGTATGTGGAGGACACCCCGGAGCCACCTCTCCATGACTTCTACTGCAGCAAGCTTCTGGACCTGGTTTTTCTGCTAGATGGCTCCTCCAAGCTGTCTGAGGACGAGTTTGAAGTGCTGAAAGTCTTTGTGGTGGGCATGATGGAGCGTCTGCACATCTCCCAGAAGCGGATCCGCGTGGCCATGGTGGAGTACCATGATGGCTCCCATGCCTACATCGAGCTCAAGGACCGGAAGCGACCCTCGGAGCTGCGGCGCATCGCCAGCCAGGTGAAGTACGTGGGCAGCGAGGTGGCCTCCACCAGCGAGGTCTTGAAGTACACACTGTTCCAGATCTTCGGCAAGATCGACCGCCCCGAAGCGTCCCGCATCGCCCTGATCCTCATGGCCAGCCAGGAGCCCCCGAGGCTGGCCCGGAATTTGGTCCGCTACGTGCAGGGCCTGAAGAAGAAGAAAGTCATTGTGATCCCCGTGGGCATCGGGCCCCACGCCAACCTCAAGCAGATCCGAAACATCGAGAAGCAGGCCCCCGAGAACAAGGCCTTTGTGCTCAGTGGTGTGGACGAGCTGGAGCAGCGAAGAGATGAGATTATCAGCTACCTCTGTGACCTTGCCCCGGAAGCACCTGCCCCTACTCAGCACCCCCCTATGGTCCCGGTCACTGTGGGTCCGGAGCTCTTGGGGGTTCCATCATCGGGACCCAAAAGGAACTCCATGGTTCTGGATGTGGTGTTTGTCCTGGAAGGGTCAGACAAAATTGGTGAGGCCAACTTTAACAAGAGTAGGGAGTTCATGGAGGAGGTGATTCAGAGGATGGACGTGGGCCAGGACAGCATCCACGTCACGGTGCTGCAGTACTCCTACACGGTGGCCGTGGAGTACACCTTCAGCGAGGCCCAGTCCAAGGGGGAGGTCCTGCAGCACGTGCGGGAGATCCGATACCGGGGCGGCAACAGGACCAACACCGGGCTGGCCCTGCAGTACCTGTCTGAACACAGCTTCTCTGTCAGCCAGGGGGATCGGGAGCAGGTCCCTAACCTGGTCTACATGGTCACAGGAAACCCCGCCTCTGATGAGATCAAGCGGATGCCTGGAGACATCCAGGTGGTGCCCATTGGAGTGGGCCCTCACGCCGATGTGCAGGAGCTGCAGA?????????????????????????????????????????????????????????????????????????????????????????????????????????????????????????????????????????????????????????????????????????????????????????????????????????????????????????????????????????????????????????????????????????????????????????????????????????????????????????????????????????????????????????????????????????????????????????????????????????????????????????????????????????????????????????????????????????????????????????????????????????????????????????????????????????????????????????????????????????????????????????????????????????????????????????????????????????????????????????????????????????????????????????????????????????????????????????????????????????????????????????????????????????????????????????????????????????????????????????????????????????????????????????????????????????????????????????????????????????????????????????????????????????????????????????????????????????????????????????????????????????????????????????????????????????????????????????????????????????????????????????-----------TTCTCTGCTGGAAACAATGAGAACAGCACTGAGGCCCACATAGGAATAAATGGAGAAGCCAACCTGGATTTCCTCAACATTCCTTTGACAATTCCTGAAATGACTCTACCTTACACAATGCTCACAACTCCCCAGGTGAAAGATTTCTCCTTGTGGGAAAAAACAGGCTTGAAGGATTTCTTGAAGACAACAAAGCAATCATTTGATTTAAGTGTAAAGGCCCAGTATAAGAAAAACAAAGACAAGCATATCATCCCAATTCCTTTTTATGCAAAAGATCTCCAGGTATTGAGTACCCCAAATGATATTTTCATTCCAGCCATGGGCAATGTTACCTATGACTTTTCTTTTAAATCAGGCGTCGTCACGCTGAATACCAATGTTGGACTGTATAACCAGTCAGATATTGTTGCTCATTTCCTAAGTTCCTCTTCTTCTGTTACTGATGCACTGCAGTACAAATTAGAGGGCACCTCAAGTCTGACGAGGAAAAGAGGCTTGAAGCTAGCCACAGCTTTTTCTCTGACTAATAAATTCGTGGAAGGCAATCATGACAATACTATTAGTTTGACCAAGAAAAACATGGAGGCATCAGTGACAACATCTGCAAAAGTCCAAATTCCCATTTTGAGAATGAATTTCAAGCAAGAACTTAATGGAAATACCAAGTCGAAGCCTACTGTCTCTTCATCCATTGAATTAACGTATGATCTCAATTCCCCTGAACTGTACTCTACTGCCACAGGGACAGTCAAACACAAACTCAACTTAGAGAGCCTCACCTCTTACTTTTCCATTGAGTCATCTACCAAAGGGGATATCAAGGGTTCAGTACTTTCAAGGGAATATTCAGGAACTATTGCCAGTGAGGCCAGCACTTACTTGAATTCCAAGAGTACTCGGTCTTCAGTGAAGCTGCAAGGGGCTTCCAAAGTTGATG????????????CATGAGAGCCCAAGACCTTGATGACTACCTGAATGGCCCCTTCACCGTCGTGGTGAAGGAGTCTTGTGACGGAATGGGAGATGTGAGCGAGAAGCACGGGAGCGGGCCAGCAGTTCCAGAAAAGGCAGTTCGGTTTTCGTTCACGGTCATGAAAATTACTGTAGCCCATGGCTCAGAAAACGTGAAGGTGTTTGAAGAAGTCAAACCCAACTCTGAACTGTGTTGTAAGCCCCTGTGTCTCATGCTGGCAGATGAGTCTGACCATGAGACCCTGACGGCCATCCTGAGCCCTCTCATTGCCGAGAGGGAGGCCATGAAGAGCAGCCAATTAATGCTTGAGATGGGAGGCATCCTTCGGACTTTCAAGTTCATCTTTAGGGGCACCGGATATGATGAGAAACTTGTCCGGGAAGTCGAAGGCCTCGAGGCTTCTGGCTCAGTCTACATTTGTACCCTTTGTGACGCCACCCGCCTGGAAGCCTCTCAAAATCTTGTCTTCCACTCCATCACCAGAAGCCACTCTGAGAACCTGGAGCGCTATGAGGTCTGGCGTTCCAACCCATACCACGAGTCAGTGGAAGAACTGCGGGATCGGGTGAAAGGGGTCTCATCGAAACCTTTCATCGAGACTGTCCCTTCCATAGATGCCCTCCACTGTGACATTGGCAACGCGGCTGAGTTCTACAAGATTTTCCAGCTAGAGATAGGGGAGGCATATAGGAATCCAAATGCTTCCAAAGAGGAAAGGAAAAGATGGCAGGCTACATTGGACAAGCATCTCCGGAAGAAGATGAACCTGAAACCCATCATGAGGATGAACGGCAACTTTGCCAGGAAGCTCATGACCAAAGAGACAGTTGAAGCAGTTTGTGAATTAATTCCCTCTGAGGAGAGGCACGAAGCTCTGAGGGAGCTGATGGACCTTTACCTGAAGATGAAGCCTGTATGGCGATCAACGTGTCCCGCAAAAGAGTGCCCAGAATCCCTCTGCCAGTATAGCTTCAATTCACAGCGTTTTGCTGAGCTCCTTTCTACCAAGTTCAAGTATAGATATGAGGGCAAAATCACCAATTATTTTCACAAAACCCTGGCACACGTCGCCCATGTGCTGACCACCGGGGTGCAGAGCTCCTTGAACGACCCTCGCCTGGTCATCTCATATGAGCCCAGCACTCTTGAGGCTCCCCGGCAAGCCCCAGCACTCACCAACCTCACCCAAGAGGAACAGCTTGCCCGGTTGCAGAAGGGCATCCGCCATGAGGTTCTGGAGGGCAATGTGGGCTACCTGCGTATGGACGACATCCCAGGCCAGGAGGTGGTGAGCAAGCTGGGGGGCTTCCTGGTGGCCAGCGTCTGGAGGAAGCTCATGGGCACCTCTGCCTTGGTGCTGGACCTCCGGCACTGCACTGGGGGCCACATTTCCGGCATCCCCTATGTCATCTCCTACCTACACCCAGGGAACACGGTCCTGCACGTAGATACCATCTACAACCGCCCCTCCAATACAACCACTGAGATCTGGACCCTGCCCCAGGTCCTAGGAGAAAGGTACAGTGCCGACAAGGATGTGGTGGTCCTCACCAGCGGCCACACGGGGGGCGTGGCTGAGGACATCACTTACATCCTCAAACAGATGCGCAGGGCCATCGTGGTGGGTGAGCGGACTGTGGGGGGTGCCCTGGACCTCCAGAAGCTGCGGATAGGCCAGTCCGACTTCTTCCTCACTGTGCCCGTGTCCAGGTCCCTAGGGCCCCTGGGAGGGGGCAGCCAGACATGGGAGGGCAGTGGAGTGCTGCCCTGTGTGGGGACACCAGCAGAGCAGGCGCTCGAGAAAGCCCTGGCCATCCTCACTCTGCGCCGGGCCCTGCCAGGAGTCGTGCAGCGCCTGCAAGAGGCACTGCAGGCCTACTACACGCTGGTGGACCGCGTGCCCACCCTGCTGCACCACCTGGCCAACATGGACTTCTCTGCGGTGGTCTCCGAGGAGGACCTGGTCACAAAGCTCAACGCTGGTCTACAGACTGCGTCTGAGGACCCCAGGCTCCTGGTGCGGGCCGTCAGGCCCAAGGAAACCCTTTCTGGGCCTGAGGTTGGAGACGATGACCCTCCGGAGGTGGTCCCCACAGTGGCTGAGGATGAGGCTGTCCGGCGGGCCCTGGTGGACTCTATGTTCCAGGTGTCCGTGCTGCCGGGCAACGTGGGCTACCTCCGCTTTGACAGCTTTGCCGACGCCTCGGTGCTGGAGGTGCTGAGCCCATACATCGTGCGCCAGGTGTGGGAGC?????0001110132?00230231112000310302111000?0?21103230010000?111011111211001011112111131?11?00100015033?????????32????11110??01????2??????00?1101?100010011101211321111111111(0 1)010111110021100110101010110111011001

Oligobunis_sp ??????????????????????????????????????????????????????????????????????????????????????????????????????????????????????????????????????????????????????????????????????????????????????????????????????????????????????????????????????????????????????????????????????????????????????????????????????????????????????????????????????????????????????????????????????????????????????????????????????????????????????????????????????????????????????????????????????????????????????????????????????????????????????????????????????????????????????????????????????????????????????????????????????????????????????????????????????????????????????????????????????????????????????????????????????????????????????????????????????????????????????????????????????????????????????????????????????????????????????????????????????????????????????????????????????????????????????????????????????????????????????????????????????????????????????????????????????????????????????????????????????????????????????????????????????????????????????????????????????????????????????????????????????????????????????????????????????????????????????????????????????????????????????????????????????????????????????????????????????????????????????????????????????????????????????????????????????????????????????????????????????????????????????????????????????????????????????????????????????????????????????????????????????????????????????????????????????????????????????????????????????????????????????????????????????????????????????????????????????????????????????????????????????????????????????????????????????????????????????????????????????????????????????????????????????????????????????????????????????????????????????????????????????????????????????????????????????????????????????????????????????????????????????????????????????????????????????????????????????????????????????????????????????????????????????????????????????????????????????????????????????????????????????????????????????????????????????????????????????????????????????????????????????????????????????????????????????????????????????????????????????????????????????????????????????????????????????????????????????????????????????????????????????????????????????????????????????????????????????????????????????????????????????????????????????????????????????????????????????????????????????????????????????????????????????????????????????????????????????????????????????????????????????????????????????????????????????????????????????????????????????????????????????????????????????????????????????????????????????????????????????????????????????????????????????????????????????????????????????????????????????????????????????????????????????????????????????????????????????????????????????????????????????????????????????????????????????????????????????????????????????????????????????????????????????????????????????????????????????????????????????????????????????????????????????????????????????????????????????????????????????????????????????????????????????????????????????????????????????????????????????????????????????????????????????????????????????????????????????????????????????????????????????????????????????????????????????????????????????????????????????????????????????????????????????????????????????????????????????????????????????????????????????????????????????????????????????????????????????????????????????????????????????????????????????????????????????????????????????????????????????????????????????????????????????????????????????????????????????????????????????????????????????????????????????????????????????????????????????????????????????????????????????????????????????????????????????????????????????????????????????????????????????????????????????????????????????????????????????????????????????????????????????????????????????????????????????????????????????????????????????????????????????????????????????????????????????????????????????????????????????????????????????????????????????????????????????????????????????????????????????????????????????????????????????????????????????????????????????????????????????????????????????????????????????????????????????????????????????????????????????????????????????????????????????????????????????????????????????????????????????????????????????????????????????????????????????????????????????????????????????????????????????????????????????????????????????????????????????????????????????????????????????????????????????????????????????????????????????????????????????????????????????????????????????????????????????????????????????????????????????????????????????????????????????????????????????????????????????????????????????????????????????????????????????????????????????????????????????????????????????????????????????????????????????????????????????????????????????????????????????????????????????????????????????????????????????????????????????????????????????????????????????????????????????????????????????????????????????????????????????????????????????????????????????????????????????????????????????????????????????????????????????????????????????????????????????????????????????????????????????????????????????????????????????????????????????????????????????????????????????????????????????????????????????????????????????????????????????????????????????????????????????????????????????????????????????????????????????????????????????????????????????????????????????????????????????????????????????????????????????????????????????????????????????????????????0?0???0010?00?0?000?0?101?00??000000?????000?100?0?00???0100?0???????????????0?0?000000000?1000000200201000112101?00000?10?111?0??22????????????????????????????????????????????????????????????????????????

Otaria_flavescens ??????????????????????????????????????????????????????????????????????????????????????????????????????????????????????????????????????????????????????????????????????????????????????????????????????????????????????????????????????????????????????????????????????????????????????????????????????????????????????????????????????????????????????????????????????????????????????????????????????????????????????????????????????????????????????????????????????????????????????????????????????????????????????????????????????????????????????????????????????????????????????????????????????????????????????????????????????????????????????????????????????????????????????????????????????????????????????????????????????????????????????????????????????????????????????????????????????????????????????????????????????????????????????????????????????????????????????????????????????????????????????????????????????????????????????????????????????????????????????????????????????????????????????????????????????????????????????????????????????????????????????????????????????????????????????????????????????????????????????????????????????????????????????????????????????????????????????????????????????????????????????????????????????????????????????????????????????????????????????????????????????????????????????????????????????????????????????????????????????????????????????????????????????????????????????????????????????????????????????????????????????????????????????????????????????????????????????????????????????????????????????????????????????????????????????????????????????????????????????????????????????????????????????????????????????????????????????????????????????????????????????????????????????????????????????????????????????????????????????????????????????????????????????????????????????????????????????????????????????????????????????????????????????????????????????????????????????????????????????????????????????????????????????????????????????????????????????????????????????????????????????????????????????????????????????????????????????????????????????????????????????????????????????????????????????????????????????????????????????????????????????????????????????????????????????????????????????????????????????????????????????????????????????????????????????????????????????????????????????????????????????????????????????????????????????????????????????????????????????????????????????????????????????????????????????????????????????????????????????????????????????????????????????????????????????????????????????????????????????????????????????????????????????????????????????????????????????????????????????????????????????????????????????????????????????????????????????????????????????????????????????????????????????????????????????????????????????????????????????????????????????????????????????????????????????????????????????????????????????????????????????????????????????????????????????????????????????????????????????????????????????????????????????????????????????????????????????????????????????????????????????????????????????????????????????????????????????????????????????????????????????????????????????????????????????????????????????????????????????????????????????????????????????????????????????????????????????????????????????????????????????????????????????????????????????????????????????????????????????????????????????????????????????????????????????????????????????????????????????????????????????????????????????????????????????????????????????????????????????????????????????????????????????????????????????????????????????????????????????????????????????????????????????????????????????????????????????????????????????????????????????????????????????????????????????????????????????????????????????????????????????????????????????????????????????????????????????????????????????????????????????????????????????????????????????????????????????????????????????????????????????????????????????????????????????????????????????????????????????????????????????????????????????????????????????????????????????????????????????????????????????????????????????????????????????????????????????????????????????????????????????????????????????????????????????????????????????????????????????????????????????????????????????????????????????????????????????????????GCCCATGTGCTGACCACCGGGGTGCAGAGCTCCTTGAACGACCCTCGCCTGGTCATCTCATATGAGCCCAGCACTCTTGAGGCTCCCCGGCAAGCCCCAGCACTCACCAACCTCACACAAGAGGAACAGCTTGCCCGGTTGCAGAAGGGCATCCGCCATGAGGTTCTGGAGGGCAATGTGGGCTACCTGCGTATGGACGACATCCCAGGCCAGGAGGTGGTGAGCAAGCTGGGGGGCTTCCTGGTGGCCAGCGTCTGGAGGAAGCTCATGGGCACCTCTGCCTTGGTGCTAGACCTCCGGCACTGCACTGGGGGCCACATTTCCGGCATCCCCTACGTCATCTCCTACCTACACCCAGGGAACACGGTCCTGCACGTAGATACCATCTACAACCGCCCCTCCAATACAACCACTGAGATCTGGACCCTGCCCCAGGTCCTAGGAGAAAGGTACAGTGCCGACAAGGATGTGGTGGTCCTCACCAGCGGCCACACGGGGGGCGTGGCTGAGGACATCACTTACATCCTCAAACAGATGCGCAGGGCCATCGTGGTGGGTGAGCGGACTGTGGGGGGTGCCCTGGACCTCCAGAAGCTGCGGATAGGCCAGTCCGACTTCTTCCTCACTGTGCCCGTGTCCAGATCCCTAGGGCCCCTGGGAGGGGGCAGCCAGACATGGGAGGGCAGTGGAGTGCTGCCCTGTGTGGGGACACCAGCAGAGCAGGCGCTCGAGAAAGCCCTGGCCATCCTCACTCTGCGCCGGGCCCTGCCAGGAGTTGTGCAGCGCCTGCAGGAGGCACTGCAGGCCTACTACACGCTGGTGGACCGCGTGCCCACCCTGCTGCACCACCTGGCCAACATGGACTTCTCTACGGTGGTCTCCGAGGAGGACCTGGTCACGAAGCTCAACGCTGGTCTACAGACTGCGTCTGAGGACCCCAGGCTCCTGGTGCGGGCCGTCAGGCCCAAGGAAACCCTTTCTGGGCCTGAGGTTGGAGACGATGACCCTCCGGAGGTGGTCCCCACAGTGGCCGAGGATGAGGCTGTCCGGCGGGCCCTGGTGGACTCTATGTTCCAGGTGTCCGTGCTGCCGGGCAACGTGGGCTACCTCCGCTTTGACAGCTTTGCCGACGCCTCCGTGCTGGAGGTGCTGAGCCCATACATCGTGCGCCAGGTGTGGGAGC?????01211001001(0 1)0230320222100021300010100???2110?130010020?1201?10?01010010??1???0113000?10000001??3??????????22????110101???????2?????????????????????????????????????????????11111012?????????????????????????

Paragale_hurzeleri ??????????????????????????????????????????????????????????????????????????????????????????????????????????????????????????????????????????????????????????????????????????????????????????????????????????????????????????????????????????????????????????????????????????????????????????????????????????????????????????????????????????????????????????????????????????????????????????????????????????????????????????????????????????????????????????????????????????????????????????????????????????????????????????????????????????????????????????????????????????????????????????????????????????????????????????????????????????????????????????????????????????????????????????????????????????????????????????????????????????????????????????????????????????????????????????????????????????????????????????????????????????????????????????????????????????????????????????????????????????????????????????????????????????????????????????????????????????????????????????????????????????????????????????????????????????????????????????????????????????????????????????????????????????????????????????????????????????????????????????????????????????????????????????????????????????????????????????????????????????????????????????????????????????????????????????????????????????????????????????????????????????????????????????????????????????????????????????????????????????????????????????????????????????????????????????????????????????????????????????????????????????????????????????????????????????????????????????????????????????????????????????????????????????????????????????????????????????????????????????????????????????????????????????????????????????????????????????????????????????????????????????????????????????????????????????????????????????????????????????????????????????????????????????????????????????????????????????????????????????????????????????????????????????????????????????????????????????????????????????????????????????????????????????????????????????????????????????????????????????????????????????????????????????????????????????????????????????????????????????????????????????????????????????????????????????????????????????????????????????????????????????????????????????????????????????????????????????????????????????????????????????????????????????????????????????????????????????????????????????????????????????????????????????????????????????????????????????????????????????????????????????????????????????????????????????????????????????????????????????????????????????????????????????????????????????????????????????????????????????????????????????????????????????????????????????????????????????????????????????????????????????????????????????????????????????????????????????????????????????????????????????????????????????????????????????????????????????????????????????????????????????????????????????????????????????????????????????????????????????????????????????????????????????????????????????????????????????????????????????????????????????????????????????????????????????????????????????????????????????????????????????????????????????????????????????????????????????????????????????????????????????????????????????????????????????????????????????????????????????????????????????????????????????????????????????????????????????????????????????????????????????????????????????????????????????????????????????????????????????????????????????????????????????????????????????????????????????????????????????????????????????????????????????????????????????????????????????????????????????????????????????????????????????????????????????????????????????????????????????????????????????????????????????????????????????????????????????????????????????????????????????????????????????????????????????????????????????????????????????????????????????????????????????????????????????????????????????????????????????????????????????????????????????????????????????????????????????????????????????????????????????????????????????????????????????????????????????????????????????????????????????????????????????????????????????????????????????????????????????????????????????????????????????????????????????????????????????????????????????????????????????????????????????????????????????????????????????????????????????????????????????????????????????????????????????????????????????????????????????????????????????????????????????????????????????????????????????????????????????????????????????????????????????????????????????????????????????????????????????????????????????????????????????????????????????????????????????????????????????????????????????????????????????????????????????????????????????????????????????????????????????????????????????????????????????????????????????????????????????????????????????????????????????????????????????????????????????????????????????????????????????????????????????????????????????????????????????????????????????????????????????????????????????????????????????????????????????????????????????????????????????????????????????????????????????????????????????????????????????????????????????????????????????????????????????????????????????????????????????????????????????????????????????????????????????????????????????????????????????????????????????????????????????????????????????????????????????????????????????????????????????????????????????????????????????????????????????????????????????????????????????????????????????????????????????????????????????????????????????????????????????????????????????????????????????????????0010110?00010?2?00010?1??230?10000001000?003?110?1102???010?00?0??00000???????????00?00000011000012002001102????1?0?????????12?????2????????????????????????????????????????????????????????????????????????

Phoberogale_sp ??????????????????????????????????????????????????????????????????????????????????????????????????????????????????????????????????????????????????????????????????????????????????????????????????????????????????????????????????????????????????????????????????????????????????????????????????????????????????????????????????????????????????????????????????????????????????????????????????????????????????????????????????????????????????????????????????????????????????????????????????????????????????????????????????????????????????????????????????????????????????????????????????????????????????????????????????????????????????????????????????????????????????????????????????????????????????????????????????????????????????????????????????????????????????????????????????????????????????????????????????????????????????????????????????????????????????????????????????????????????????????????????????????????????????????????????????????????????????????????????????????????????????????????????????????????????????????????????????????????????????????????????????????????????????????????????????????????????????????????????????????????????????????????????????????????????????????????????????????????????????????????????????????????????????????????????????????????????????????????????????????????????????????????????????????????????????????????????????????????????????????????????????????????????????????????????????????????????????????????????????????????????????????????????????????????????????????????????????????????????????????????????????????????????????????????????????????????????????????????????????????????????????????????????????????????????????????????????????????????????????????????????????????????????????????????????????????????????????????????????????????????????????????????????????????????????????????????????????????????????????????????????????????????????????????????????????????????????????????????????????????????????????????????????????????????????????????????????????????????????????????????????????????????????????????????????????????????????????????????????????????????????????????????????????????????????????????????????????????????????????????????????????????????????????????????????????????????????????????????????????????????????????????????????????????????????????????????????????????????????????????????????????????????????????????????????????????????????????????????????????????????????????????????????????????????????????????????????????????????????????????????????????????????????????????????????????????????????????????????????????????????????????????????????????????????????????????????????????????????????????????????????????????????????????????????????????????????????????????????????????????????????????????????????????????????????????????????????????????????????????????????????????????????????????????????????????????????????????????????????????????????????????????????????????????????????????????????????????????????????????????????????????????????????????????????????????????????????????????????????????????????????????????????????????????????????????????????????????????????????????????????????????????????????????????????????????????????????????????????????????????????????????????????????????????????????????????????????????????????????????????????????????????????????????????????????????????????????????????????????????????????????????????????????????????????????????????????????????????????????????????????????????????????????????????????????????????????????????????????????????????????????????????????????????????????????????????????????????????????????????????????????????????????????????????????????????????????????????????????????????????????????????????????????????????????????????????????????????????????????????????????????????????????????????????????????????????????????????????????????????????????????????????????????????????????????????????????????????????????????????????????????????????????????????????????????????????????????????????????????????????????????????????????????????????????????????????????????????????????????????????????????????????????????????????????????????????????????????????????????????????????????????????????????????????????????????????????????????????????????????????????????????????????????????????????????????????????????????????????????????????????????????????????????????????????????????????????????????????????????????????????????????????????????????????????????????????????????????????????????????????????????????????????????????????????????????????????????????????????????????????????????????????????????????????????????????????????????????????????????????????????????????????????????????????????????????????????????????????????????????????????????????????????????????????????????????????????????????????????????????????????????????????????????????????????????????????????????????????????????????????????????????????????????????????????????????????????????????????????????????????????????????????????????????????????????????????????????????????????????????????????????????????????????????????????????????????????????????????????????????????????????????????????????????????????????????????????????????????????????????????????????????????????????????????????????????????????????????????????????????????????????????????????????????????????????????????????????????????????????????????????????????????????????????????????????????????????????????????????????????????????????????????????????????????????????????001011?0?00111000?0????0??00?0?0000000102011?10020002???010100?0??00000??0???010?0?0100?000?0700000001020000010?10000002120(0 2)00100(0 1)01?????0?0?12????00?1000000000000???0????00000?0?0?00?0?01?000000?????????

Phoca_sp TGGTGCCCCCCACGGAAGGCCCCATTGGCTCCACCACCCCATATGTGGAGGACACCCCAGAGCCACCTCTCCATGACTTCTACTGCAGCAAGCTTCTGGACCTGGTTTTCCTGCTAGATGGCTCCTCCAAGCTGTCTGAGGACGAGTTTGAAGTGCTGAAAGTCTTTGTGGTGGGCATGATGGAGCGTCTGCACATCTCCCAGAAGCGGATCCGCGTGGCCGTGGTGGAGTACCACGATGGCTCCCATGCCTACATCGAGCTCAAGGACCGGAAGCGACCCTCGGAGCTGCGGCGCATTGCCAGCCAGGTGAAGTACGTGGGCAGCGAGGTGGCCTCCACCAGCGAGGTCTTGAAGTACACACTGTTCCAGATCTTCGGCAAGATCAACCGCCCCGAAGCGTCCCGCATCACGCTGCTCCTCATGGCCAGCCAGGAGCCCCCGAGGCTGGCCCGGAATTTGGTCCGCTACGTGCAGGGCCTGAAGAAGAAGAAAGTCATTGTGATCCCCGTGGGCATTGGGCCCCACGCCAACCTCAAGCAGATCCGAAACATCGAGAAGCAGGCCCCCGAGAACAAGGCCTTTGTGCTCAGTGGTGTGGACGAGCTGGAGGAGCGAAGAGACGAGATTATCAGCTACCTCTGTGACCTTGCCCCGGAAGCACCTGCCCCTACTCAGCACCCCTCTATGGTCCCAGTCACTGTGGGTCCGGAGCTCTTGGGGGTTCCCTCATCGGGACCCAAAAGGAACTCCATGGTTCTGGATGTGGTGTTTGTCCTGGAAGGGTCGGACAAAATTGGTGAGGCCAACTTTAACAAGAGCAAGGAGTTCATGGAGGAGGTGATTCAGCGGATGGACGTGGGCCAGGACAGCATCCGTGTCACGGTGCTGCAGTACTCCTACACGGTGGCCGTGGAGCACACCTTCAGCGACACCCAGGCCAAGGCGGAGGTCCTGCAGCACGTGCGGGAGATCCGATACCGGGGCGGCAACAGGACCAACACCGGGCTGGCCCTGCAGTACCTGTCTGAACATAGCTTCTCTGTCAGCCAGGGGGATCGGGAGCAGGTCCCTAACCTGGTCTACATGGTCACAGGAAACCCCGCCTCTGATGAGATCAAGCGGATGCCTGGAGACATCCAGGTGGTGCCCATTGGAGTGGGCCCTCACGCCGATGTGCAGGAGCTGCAGA?????????????????????????????????????????????????????????????????????????????????????????????????????????????????????????????????????????????????????????????????????????????????????????????????????????????????????????????????????????????????????????????????????????????????????????????????????????????????????????????????????????????????????????????????????????????????????????????????????????????????????????????????????????????????????????????????????????????????????????????????????????????????????????????????????????????????????????????????????????????????????????????????????????????????????????????????????????????????????????????????????????????????????????????????????????????????????????????????????????????????????????????????????????????????????????????????????????????????????????????????????????????????????????????????????????????????????????????????????????????????????????????????????????????????????????????????????????????????????????????????????????????????????????????????????????????????????????????????????????????????????????-----------TTCTCTGCTGGAAACAATGAGAACAGCACTGAGGCCCACGTAGGAATAAATGGAGAAGCCAACCTGGATTTCCTCAACATTCCTTTGACAATTCCTGAAATGACTGTACCTTACACAATGCTCACAACTCCCCAGGTGAAAGATTTCTCCTTGTGGGAGAAAACAGGCTTGAAGGATTTCTTGAAGACAACAAAGCAATCATTTGATTTAAGTGTAAAGGCCCAGTATAAGAAAAACAAAGACAAGCATATCATCCCAATTCCTTTTTATGCAAAAGATTTCCAGGTATTGAGTACCCCAAATGATATTTTCATTCCAGCCATGGGCAATGTTACCTATGACTTTTCTTTTAAATCAGGCATCATCACACTGAATACCAATGTTGGACTGTATAACCAGTCAGATATTGTTGCTCATTTCCTAACTTCCTCTTCTTCTGTTACTGATGCACTGCAGTACAAATTAGAGGGCACCTCAAGTTTGACGAGGAAAAGAGGCTTGAAGCTAGCCACAGCTTTGTCTCTGACTAACAAATTCGTGGAAGGCAATCATGACAGTACTATTAGTTTGACCAGGAAAAACATGGAGGCATCAGTGACAACATCTGCAAAAGTCCAAATTCCCATTTTGAGAATGAATTTCAAGCAAGAACTTAATGGAAATACCAAGTCGAAGCCTACTGTCTCTTCATCCATTGAATTAACATACGATCTCAATTCCCCTGAACTGTACTCTACTGCCACAGGGACAGTCAACCACAAACTCAACTTAGAGAGCCTCACCTCTTACTTTTCCATTGAGTCATCTACCAAAGGGGATATCAAGGGTTCAGTACTTTCAAGGGAATATTCAGGAACTATTGCCAGTGAGGCCAGCACTTACTTGAATTCCAAGAGTACTCGGTCTTCAGTGAAGCTGCAAGGGGCTTCCAAAGTTGATG????????????CATGAGAGCCCGAGACCTTGATGACTACCTGAATGGCCCCTTCACTGTCGTGGTGAAGGAGTCTTGTGACGGAATGGGAGATGTGAGCGAGAAGCACGGGAGTGGGCCAGCAGTTCCAGAAAAGGCAGTTCGGTTTTCGTTCACGGTCATGAAAATTACTGTAGCCCATGGCTCAGAAAACGTGAAGGTGTTTGAAGAAGTCAAACCCAACTCCGAACTGTGTTGTAAGCCCCTGTGTCTCATGCTGGCAGATGAGTCTGACCACGAGACCCTGACGGCCATCCTGAGCCCTCTCATTGCCGAGAGGGAGGCCATGAAGAGCAGCCAATTAATGCTTGAGATGGGAGGCATCCTTCGGACTTTCAAGTTCATCTTCAGGGGCACTGGATATGATGAGAAACTCGTCCGGGAAGTCGAAGGCCTTGAGGCTTCTGGCTCAGTCTACATTTGTACCCTTTGTGACGCCACCCGCCTGGAAGCCTCTCAGAATCTTGTCTTCCACTCCATCACCAGAAGCCACTCTGAGAACCTGGAGCGCTATGAGGTCTGGCGTTCCAACCCATACCACGAGTCGGTGGAAGAACTGCGGGATCGGGTGAAAGGGGTCTCATCGAAACCTTTCATCGAGACTGTCCCTTCCATAGATGCACTCCACTGTGACATTGGCAATGCGGCTGAGTTCTACAAGATTTTCCAGCTAGAGATAGGGGAGGTGTATAAGAATCCCAATGCTTCCAAAGAGGAAAGGAAAAGATGGCAGGCTACATTGGACAAGCATCTCCGGAAGAAGATGAACCTGAAACCCATCATGAGGATGAATGGCAACTTTGCCAGGAAGCTCATGACCAAAGAGACAGTTGAAGCAGTTTGTGAATTAATTCCCTCTGAGGAGAGGCACGAAGCTCTGAGGGAGCTGATGGACCTTTACCTGAAGATGAAGCCTGTATGGCGATCATCGTGTCCTGCAAAAGAGTGCCCAGAATCCCTCTGCCAGTATAGCTTCAATTCACAGCGTTTTGCTGAGCTCCTCTCTACCAAGTTCAAGTATAGATATGAGGGCAAAATCACCAATTATTTTCACAAAACCCTGGCACA????GCCCATGTGCTGACCACGGGGGTGCAGAGCTCCTTGAACGACCCTCGCCTGGTCATCTCATATGAGCCCAGCACCCTTGAGGCTCCCCGGCAAGCCCCAGCACTCACCAACCTCACACAAGAGGAACAGCTTGCCCGGTTGCAGAAGGGCATCCGCCACGAGGTTCTGGAGGGCAATGTGGGCTACCTGCGTATGGACGACATCCCAGGCCAGGAGGTGGTGAGCAAGCTGGGGGGCTTCCTGGTGACCAGCGTCTGGAGGAAGCTCATGGGCACCTCTGCCTTGGTGCTGGACCTCCGGCACTGCACTGGGGGCCATATTTCCGGCATCCCCTATGTCATCTCCTACCTACACCCAGGGAACACAGTCCTGCACGTGGATACCATCTACAACCGCCCCTCCAATACAACCACTGAGATCTGGACCCTGCCCCAGGTCCTAGGAGAAAGGTACAGTGCCGACAAGGATGTGGTGGTCCTCACCAGCGGCCACACGGGGGGCGTGGCTGAGGACATCACTTACATCCTCAAACAGATGCGCAGGGCCATCGTGGTGGGTGAGCGGACTGTGGGGGGTGCCCTGGACCTCCAGAAGCTGCGGATAGGCCAGTCCGACTTCTTCCTCACTGTGCCTGTGTCCAGGTCCCTAGGGCCCCTGGGAGGAGGCAGCCAGACATGGGAGGGCAGCGGGGTGCTGCCCTGCGTGGGGACACCAGCAGAGCAGGCGCTCGAGAAAGCCCTGGCCATCCTCACTCTGCGCCGGGCCCTGCCAGGAGTCGTGCAGCGCCTGCAGGAGGCCCTGCAAGCCTACTACACGCTGGTGGACCGCGTGCCCACCCTGCTGCACCACCTGGCCAACATGGACTTCTCTGCGGTGGTCTCCGAGGAGGACCTGGTCACGAAGCTCAACGCTGGTCTACAGACTGCGTCTGAGGACCCCAGGCTCCTGGTGCGGGCCGTCAGGCCCAAGGAAACCTTTTCTGGGCCTGAGGTCGGAGACGATGACCCTCCGGAGGTGGTCCCCACAGTGGCCGAGGATGAGGCTGTCCAGCAGGCCCTGGTGGACTCTATGTTCCAGGTGTCCGTGCTGCCGGGCAACGTGGGCTACCTCCGCTTTGACAGCTTTGCCGACGCCTCGGTGCTGGAGGTGCTGAGCCCATACATCGTGCACCAGGTGT???????????10111200201003311001021011103131121000014000320103112010020021?222101111?222111020000100000015022120?21201?2????11000111110?02?????20001?11111000001001120?221110100012011112120111101?020111000111?101???0?

Pinnarctidion_rayi ??????????????????????????????????????????????????????????????????????????????????????????????????????????????????????????????????????????????????????????????????????????????????????????????????????????????????????????????????????????????????????????????????????????????????????????????????????????????????????????????????????????????????????????????????????????????????????????????????????????????????????????????????????????????????????????????????????????????????????????????????????????????????????????????????????????????????????????????????????????????????????????????????????????????????????????????????????????????????????????????????????????????????????????????????????????????????????????????????????????????????????????????????????????????????????????????????????????????????????????????????????????????????????????????????????????????????????????????????????????????????????????????????????????????????????????????????????????????????????????????????????????????????????????????????????????????????????????????????????????????????????????????????????????????????????????????????????????????????????????????????????????????????????????????????????????????????????????????????????????????????????????????????????????????????????????????????????????????????????????????????????????????????????????????????????????????????????????????????????????????????????????????????????????????????????????????????????????????????????????????????????????????????????????????????????????????????????????????????????????????????????????????????????????????????????????????????????????????????????????????????????????????????????????????????????????????????????????????????????????????????????????????????????????????????????????????????????????????????????????????????????????????????????????????????????????????????????????????????????????????????????????????????????????????????????????????????????????????????????????????????????????????????????????????????????????????????????????????????????????????????????????????????????????????????????????????????????????????????????????????????????????????????????????????????????????????????????????????????????????????????????????????????????????????????????????????????????????????????????????????????????????????????????????????????????????????????????????????????????????????????????????????????????????????????????????????????????????????????????????????????????????????????????????????????????????????????????????????????????????????????????????????????????????????????????????????????????????????????????????????????????????????????????????????????????????????????????????????????????????????????????????????????????????????????????????????????????????????????????????????????????????????????????????????????????????????????????????????????????????????????????????????????????????????????????????????????????????????????????????????????????????????????????????????????????????????????????????????????????????????????????????????????????????????????????????????????????????????????????????????????????????????????????????????????????????????????????????????????????????????????????????????????????????????????????????????????????????????????????????????????????????????????????????????????????????????????????????????????????????????????????????????????????????????????????????????????????????????????????????????????????????????????????????????????????????????????????????????????????????????????????????????????????????????????????????????????????????????????????????????????????????????????????????????????????????????????????????????????????????????????????????????????????????????????????????????????????????????????????????????????????????????????????????????????????????????????????????????????????????????????????????????????????????????????????????????????????????????????????????????????????????????????????????????????????????????????????????????????????????????????????????????????????????????????????????????????????????????????????????????????????????????????????????????????????????????????????????????????????????????????????????????????????????????????????????????????????????????????????????????????????????????????????????????????????????????????????????????????????????????????????????????????????????????????????????????????????????????????????????????????????????????????????????????????????????????????????????????????????????????????????????????????????????????????????????????????????????????????????????????????????????????????????????????????????????????????????????????????????????????????????????????????????????????????????????????????????????????????????????????????????????????????????????????????????????????????????????????????????????????????????????????????????????????????????????????????????????????????????????????????????????????????????????????????????????????????????????????????????????????????????????????????????????????????????????????????????????????????????????????????????????????????????????????????????????????????????????????????????????????????????????????????????????????????????????????????????????????????????????????????????????????????????????????????????????????????????????????????????????????????????????????????????????????????????????????????????????????????????????????????????????????????????????????????????????????????????????????????????????????????????????????????????????????????????????????????????????????????????????????????????????????????????????????????????????????????001112000(1 2)111?31030002100100(2 3)01?1?1100012010323012002110100?11?01110010??????0???0?01?00001012111(0 1)201212001102101????????????????????????????000??01101121?????????????????100?0?111????????????????????????

Piscophoca_pacifica ??????????????????????????????????????????????????????????????????????????????????????????????????????????????????????????????????????????????????????????????????????????????????????????????????????????????????????????????????????????????????????????????????????????????????????????????????????????????????????????????????????????????????????????????????????????????????????????????????????????????????????????????????????????????????????????????????????????????????????????????????????????????????????????????????????????????????????????????????????????????????????????????????????????????????????????????????????????????????????????????????????????????????????????????????????????????????????????????????????????????????????????????????????????????????????????????????????????????????????????????????????????????????????????????????????????????????????????????????????????????????????????????????????????????????????????????????????????????????????????????????????????????????????????????????????????????????????????????????????????????????????????????????????????????????????????????????????????????????????????????????????????????????????????????????????????????????????????????????????????????????????????????????????????????????????????????????????????????????????????????????????????????????????????????????????????????????????????????????????????????????????????????????????????????????????????????????????????????????????????????????????????????????????????????????????????????????????????????????????????????????????????????????????????????????????????????????????????????????????????????????????????????????????????????????????????????????????????????????????????????????????????????????????????????????????????????????????????????????????????????????????????????????????????????????????????????????????????????????????????????????????????????????????????????????????????????????????????????????????????????????????????????????????????????????????????????????????????????????????????????????????????????????????????????????????????????????????????????????????????????????????????????????????????????????????????????????????????????????????????????????????????????????????????????????????????????????????????????????????????????????????????????????????????????????????????????????????????????????????????????????????????????????????????????????????????????????????????????????????????????????????????????????????????????????????????????????????????????????????????????????????????????????????????????????????????????????????????????????????????????????????????????????????????????????????????????????????????????????????????????????????????????????????????????????????????????????????????????????????????????????????????????????????????????????????????????????????????????????????????????????????????????????????????????????????????????????????????????????????????????????????????????????????????????????????????????????????????????????????????????????????????????????????????????????????????????????????????????????????????????????????????????????????????????????????????????????????????????????????????????????????????????????????????????????????????????????????????????????????????????????????????????????????????????????????????????????????????????????????????????????????????????????????????????????????????????????????????????????????????????????????????????????????????????????????????????????????????????????????????????????????????????????????????????????????????????????????????????????????????????????????????????????????????????????????????????????????????????????????????????????????????????????????????????????????????????????????????????????????????????????????????????????????????????????????????????????????????????????????????????????????????????????????????????????????????????????????????????????????????????????????????????????????????????????????????????????????????????????????????????????????????????????????????????????????????????????????????????????????????????????????????????????????????????????????????????????????????????????????????????????????????????????????????????????????????????????????????????????????????????????????????????????????????????????????????????????????????????????????????????????????????????????????????????????????????????????????????????????????????????????????????????????????????????????????????????????????????????????????????????????????????????????????????????????????????????????????????????????????????????????????????????????????????????????????????????????????????????????????????????????????????????????????????????????????????????????????????????????????????????????????????????????????????????????????????????????????????????????????????????????????????????????????????????????????????????????????????????????????????????????????????????????????????????????????????????????????????????????????????????????????????????????????????????????????????????????????????????????????????????????????????????????????????????????????????????????????????????????????????????????????????????????????????????????????????????????????????????????????????????????????????????????????????????????????????????????????????????????????????????????????????????????????????????????????????????????????????????????????????????????????????????????????????????????????????????????????????????????????????????????????????????????????????????????????????????????????????????????????????????????????????????????????????????????????????????????0?2012002?100331?0012?10111?31311??0????4050320??2112010020?21?2??10?1???????0100?010?000?????12?120?2120122????1???0????????2?????2100??????10?110111112102211???????201?1??????????101????????????????????

Plesiogale_angustifrans ??????????????????????????????????????????????????????????????????????????????????????????????????????????????????????????????????????????????????????????????????????????????????????????????????????????????????????????????????????????????????????????????????????????????????????????????????????????????????????????????????????????????????????????????????????????????????????????????????????????????????????????????????????????????????????????????????????????????????????????????????????????????????????????????????????????????????????????????????????????????????????????????????????????????????????????????????????????????????????????????????????????????????????????????????????????????????????????????????????????????????????????????????????????????????????????????????????????????????????????????????????????????????????????????????????????????????????????????????????????????????????????????????????????????????????????????????????????????????????????????????????????????????????????????????????????????????????????????????????????????????????????????????????????????????????????????????????????????????????????????????????????????????????????????????????????????????????????????????????????????????????????????????????????????????????????????????????????????????????????????????????????????????????????????????????????????????????????????????????????????????????????????????????????????????????????????????????????????????????????????????????????????????????????????????????????????????????????????????????????????????????????????????????????????????????????????????????????????????????????????????????????????????????????????????????????????????????????????????????????????????????????????????????????????????????????????????????????????????????????????????????????????????????????????????????????????????????????????????????????????????????????????????????????????????????????????????????????????????????????????????????????????????????????????????????????????????????????????????????????????????????????????????????????????????????????????????????????????????????????????????????????????????????????????????????????????????????????????????????????????????????????????????????????????????????????????????????????????????????????????????????????????????????????????????????????????????????????????????????????????????????????????????????????????????????????????????????????????????????????????????????????????????????????????????????????????????????????????????????????????????????????????????????????????????????????????????????????????????????????????????????????????????????????????????????????????????????????????????????????????????????????????????????????????????????????????????????????????????????????????????????????????????????????????????????????????????????????????????????????????????????????????????????????????????????????????????????????????????????????????????????????????????????????????????????????????????????????????????????????????????????????????????????????????????????????????????????????????????????????????????????????????????????????????????????????????????????????????????????????????????????????????????????????????????????????????????????????????????????????????????????????????????????????????????????????????????????????????????????????????????????????????????????????????????????????????????????????????????????????????????????????????????????????????????????????????????????????????????????????????????????????????????????????????????????????????????????????????????????????????????????????????????????????????????????????????????????????????????????????????????????????????????????????????????????????????????????????????????????????????????????????????????????????????????????????????????????????????????????????????????????????????????????????????????????????????????????????????????????????????????????????????????????????????????????????????????????????????????????????????????????????????????????????????????????????????????????????????????????????????????????????????????????????????????????????????????????????????????????????????????????????????????????????????????????????????????????????????????????????????????????????????????????????????????????????????????????????????????????????????????????????????????????????????????????????????????????????????????????????????????????????????????????????????????????????????????????????????????????????????????????????????????????????????????????????????????????????????????????????????????????????????????????????????????????????????????????????????????????????????????????????????????????????????????????????????????????????????????????????????????????????????????????????????????????????????????????????????????????????????????????????????????????????????????????????????????????????????????????????????????????????????????????????????????????????????????????????????????????????????????????????????????????????????????????????????????????????????????????????????????????????????????????????????????????????????????????????????????????????????????????????????????????????????????????????????????????????????????????????????????????????????????????????????????????????????????????????????????????????????????????????????????????????????????????????????????????????????????????????????????????????????????????????????????????????????????????????????????????????????????????????????????????????????????????????????????????????????????????????????????????????????????????????????????????????????????0000110000?10?2?00?10?1??200?10000001??????3?1?0???01???010?00?0?00?000??????0???0?0?001000110000120020011020???1?0?????????12????22??????????????0?????????????????????????????????????????????????????????

Pontolis_magnus ??????????????????????????????????????????????????????????????????????????????????????????????????????????????????????????????????????????????????????????????????????????????????????????????????????????????????????????????????????????????????????????????????????????????????????????????????????????????????????????????????????????????????????????????????????????????????????????????????????????????????????????????????????????????????????????????????????????????????????????????????????????????????????????????????????????????????????????????????????????????????????????????????????????????????????????????????????????????????????????????????????????????????????????????????????????????????????????????????????????????????????????????????????????????????????????????????????????????????????????????????????????????????????????????????????????????????????????????????????????????????????????????????????????????????????????????????????????????????????????????????????????????????????????????????????????????????????????????????????????????????????????????????????????????????????????????????????????????????????????????????????????????????????????????????????????????????????????????????????????????????????????????????????????????????????????????????????????????????????????????????????????????????????????????????????????????????????????????????????????????????????????????????????????????????????????????????????????????????????????????????????????????????????????????????????????????????????????????????????????????????????????????????????????????????????????????????????????????????????????????????????????????????????????????????????????????????????????????????????????????????????????????????????????????????????????????????????????????????????????????????????????????????????????????????????????????????????????????????????????????????????????????????????????????????????????????????????????????????????????????????????????????????????????????????????????????????????????????????????????????????????????????????????????????????????????????????????????????????????????????????????????????????????????????????????????????????????????????????????????????????????????????????????????????????????????????????????????????????????????????????????????????????????????????????????????????????????????????????????????????????????????????????????????????????????????????????????????????????????????????????????????????????????????????????????????????????????????????????????????????????????????????????????????????????????????????????????????????????????????????????????????????????????????????????????????????????????????????????????????????????????????????????????????????????????????????????????????????????????????????????????????????????????????????????????????????????????????????????????????????????????????????????????????????????????????????????????????????????????????????????????????????????????????????????????????????????????????????????????????????????????????????????????????????????????????????????????????????????????????????????????????????????????????????????????????????????????????????????????????????????????????????????????????????????????????????????????????????????????????????????????????????????????????????????????????????????????????????????????????????????????????????????????????????????????????????????????????????????????????????????????????????????????????????????????????????????????????????????????????????????????????????????????????????????????????????????????????????????????????????????????????????????????????????????????????????????????????????????????????????????????????????????????????????????????????????????????????????????????????????????????????????????????????????????????????????????????????????????????????????????????????????????????????????????????????????????????????????????????????????????????????????????????????????????????????????????????????????????????????????????????????????????????????????????????????????????????????????????????????????????????????????????????????????????????????????????????????????????????????????????????????????????????????????????????????????????????????????????????????????????????????????????????????????????????????????????????????????????????????????????????????????????????????????????????????????????????????????????????????????????????????????????????????????????????????????????????????????????????????????????????????????????????????????????????????????????????????????????????????????????????????????????????????????????????????????????????????????????????????????????????????????????????????????????????????????????????????????????????????????????????????????????????????????????????????????????????????????????????????????????????????????????????????????????????????????????????????????????????????????????????????????????????????????????????????????????????????????????????????????????????????????????????????????????????????????????????????????????????????????????????????????????????????????????????????????????????????????????????????????????????????????????????????????????????????????????????????????????????????????????????????????????????????????????????????????????????????????????????????????????????????????????????????????????????????????????????????????????????????????????????????????????????????????????????????????????????????????????????????????????????????????????????????????????????????????????????????????????????????????????????????????????????????????????????????????????002?1??1???10?3???111?10?310?02?1000????2110?1?0?1?0???????????1?1???????????0?131?????010?????32?????????11????1?1??????????1?????????????????0????????????????1?????1????1?????1??????????????1???????????

Potamotherium_vallentoni ??????????????????????????????????????????????????????????????????????????????????????????????????????????????????????????????????????????????????????????????????????????????????????????????????????????????????????????????????????????????????????????????????????????????????????????????????????????????????????????????????????????????????????????????????????????????????????????????????????????????????????????????????????????????????????????????????????????????????????????????????????????????????????????????????????????????????????????????????????????????????????????????????????????????????????????????????????????????????????????????????????????????????????????????????????????????????????????????????????????????????????????????????????????????????????????????????????????????????????????????????????????????????????????????????????????????????????????????????????????????????????????????????????????????????????????????????????????????????????????????????????????????????????????????????????????????????????????????????????????????????????????????????????????????????????????????????????????????????????????????????????????????????????????????????????????????????????????????????????????????????????????????????????????????????????????????????????????????????????????????????????????????????????????????????????????????????????????????????????????????????????????????????????????????????????????????????????????????????????????????????????????????????????????????????????????????????????????????????????????????????????????????????????????????????????????????????????????????????????????????????????????????????????????????????????????????????????????????????????????????????????????????????????????????????????????????????????????????????????????????????????????????????????????????????????????????????????????????????????????????????????????????????????????????????????????????????????????????????????????????????????????????????????????????????????????????????????????????????????????????????????????????????????????????????????????????????????????????????????????????????????????????????????????????????????????????????????????????????????????????????????????????????????????????????????????????????????????????????????????????????????????????????????????????????????????????????????????????????????????????????????????????????????????????????????????????????????????????????????????????????????????????????????????????????????????????????????????????????????????????????????????????????????????????????????????????????????????????????????????????????????????????????????????????????????????????????????????????????????????????????????????????????????????????????????????????????????????????????????????????????????????????????????????????????????????????????????????????????????????????????????????????????????????????????????????????????????????????????????????????????????????????????????????????????????????????????????????????????????????????????????????????????????????????????????????????????????????????????????????????????????????????????????????????????????????????????????????????????????????????????????????????????????????????????????????????????????????????????????????????????????????????????????????????????????????????????????????????????????????????????????????????????????????????????????????????????????????????????????????????????????????????????????????????????????????????????????????????????????????????????????????????????????????????????????????????????????????????????????????????????????????????????????????????????????????????????????????????????????????????????????????????????????????????????????????????????????????????????????????????????????????????????????????????????????????????????????????????????????????????????????????????????????????????????????????????????????????????????????????????????????????????????????????????????????????????????????????????????????????????????????????????????????????????????????????????????????????????????????????????????????????????????????????????????????????????????????????????????????????????????????????????????????????????????????????????????????????????????????????????????????????????????????????????????????????????????????????????????????????????????????????????????????????????????????????????????????????????????????????????????????????????????????????????????????????????????????????????????????????????????????????????????????????????????????????????????????????????????????????????????????????????????????????????????????????????????????????????????????????????????????????????????????????????????????????????????????????????????????????????????????????????????????????????????????????????????????????????????????????????????????????????????????????????????????????????????????????????????????????????????????????????????????????????????????????????????????????????????????????????????????????????????????????????????????????????????????????????????????????????????????????????????????????????????????????????????????????????????????????????????????????????????????????????????????????????????????????????????????????????????????????????????????????????????????????????????????????????????????????????????????????????????????????????????????????????????????????????????????????????????????????????????????????????????????????????????????????????????????????????????????????????????????????????????????????????????????????????????????????????????????????????????????????????????????????????????(0 1)02111(0 1)00(0 1)0112300001(0 3)(0 3)10000031001001010120003100?1002010100100?0?(0 1)000100000110100000000000000700012002010(0 1)011210100000110200011?1132000100000101000100002100210001000010?00100100101001000?1100011001??10101

Procyon_lotor CGGTGCCCCCCACGGATGGCCCTGGCGGCTCCACCACCCCGTACGTGGAGGACACCTCCGAGCCGCCGCTCCACGACTTCTCCTGCAGTAGACTTCTGGACCTGGTTTTCCTACTAGACGGCTCCTCCAAGCTGTCCGAGGGCGAGTTTGAAGTGCTCAAGGGCTTCGTGGTGGGCATGATGGAGCGTCTGCACATCTCCCAGAAGCGGATCCGCGTGGCCCTGGTGGAGTACCACAAAGGCTCCCACGCCTACATCGACCTCCAGGACCGGAAGCGACCCTCGGAGCTGCAGCGCATCACCAGCCAGTTGAAGTATGTGGGCAGCGAGGTGGCCTCCACCAGCGAGGTCCTCAAGTACACGCTGTTCCAGATCTTTGGCAGGATTGACCGCCCCGAAGCGTCCCGCATCGCCCTGCTCCTCATGGCCAGCCAGGAGCCCCCGAGGCTGGCCCGCAATTTGATCCGCTACGTGCAGGGCCTAAAGAAGAAGAAGGTCATCGTGATCCCCGTGGGCATCGGGCCCCATGCCAACCTCAAGCAGATCCGCAACATCGAGAAGCAGGCCCCCGAGAACAAGGCCTTCGTGCTCAGCAGTGTGGACGAGCTGGAGCAGCGAAGGGATGAGATTATCAACTACCTGTGTGACCTGGCCCCCGAACCACCCGGGCCTACCCAGCAGTCCCCTGTGGCACCGGTCACTGTGGGTCCGGAGCTCTTGGGGGTCCCGTCATCGGGACCCAAGAGGAACCCCATGGCTCTGGATGTGGTGTTCGTCCTGGAAGGCTCGGACAAAGTTGGCGAGGCCAACTTCAACAAGAGCAGGGAGTTCATGGAGGAGGTGATTCGGCGGATGGACGTGGGCCAGGACGGCATCCATGTCACAGTGCTGCAGTATTCCTACGCCGTGGCCGTGGAGTACACCTTCAGTGGGGCCCAGTCCAAGGGCGAGGTCCTGCAGCATGTGCGGGAGATCCGGTTCCGGGGCGGCAACCGGACCAACACCGGGCTGGTCCTGCAGTACCTGTCTGACCACAGCTTCTCCGTCAGCCAGGGGGCCCGGGAGCAGGTCCCTAACCTGGTCTACATGGTCACAGGAAACCCCGCCTCTGATGAGATCAAGCGGATGCCCGGAGACATCCAGGTGGTGCCCATCGGAGTGGGCCCTCACGCCGACGCCCAGGAGCTGGAGATAAAGACAGAATGAACGTAGAAAAGGCTGAATTCTGTAATAAAAGCAAACAGCCTGGCTTAGCAAGCAGCCAACAGAGCAGATGGGCTGAAAGTAAGGAAACATGTAATGATAGGCAGACTCCCAGCACAGAGAGAAAGGTACTTCTGAATGCYGATCCCCTGTGTGGGAGAAAAGAACTGAAGAAGCAGAAACCTCCATGCTCTGACAGTCCTAGAGATTCCCAAGATGTTCCTTGGATAGCACTGAATAGTAGCATACAGAAAGTTAATGAGTGGTTTTCCAGAAGTGATGAAATATTAACTTCC---GATGACTCACATGAAGGGGGATCTGAATCGAATATTGAAGTTGCTGGTGCGGTAGAAGTTCCAAAGGAAGTGAATGCATACTCTGGTTCTTCTGAGAAAATAGACTTAATGGCCAGTGAGCCTCAGAATGCATTGATCTGTGAAAGCGAAAGAGTCCACACCAAGTCCGTAGAGGGTAACATCGAAGATAAAATATTTGGGAAAACCTACCGGAGGAAGGCAAACCTCCCTAACCTGAGCCACACGAATGAAGATCTAATTGTAGGAGCGTGTGCTGTCGAACCTCAGACAACTCGATCCCATCCCCTCACGAATAATGCAAAGCGTAAAAGGAGGACTACATCAGGCCTTCGTCCTGAGGATTTTATCAGGCAGGTAGATTCGGCCGTTGTTCCAAAGRCTCCTGAAAAGCTAGTTGAGGGAACCGACCAGATTGAGCGAAGTGGTCTCGTGATGAATATCACAAATAATGGTCCTGAGAATGAAACAAAAGGTGATTATGTTCAGACCGAGAAAAATGCCCACCCAACAGAATCACTGGAAAAAGAATCTGCTTTTAGAAGCCGAGCTGAACCGATCAGCAGCAGTATAAGTAATATGGAACTGGAATTAAATAGCTCCAGTTCGAAAGCCCCTAAGAAGAACAGGCTGAGGAGGAAGTCCTCCACTAGGCACGCTTGTGCGCTTGAATTTGTAGTCAATAGAAACTCAAGCCCACCTGATCATAGCGAACTGCAGAACCATCAGAATTTCTCTGCTGGAAACAATGAGAACAGCATGGAGGCCCACATAGGAATAAATGGAGAAGCCAATCTGGATTTCCTCAACATTCCTTTGACAATTCCTGAAATGACTCTACCTTACACAATGCTCACAACTCCCCAGGTGAAAGATTTCTCCCTGTGGGAAAAAACAGGCTTGAAGGATTTCTTGAAGACAACAAAGCAATCATTTGATTTAAGTATAAAGGCTCAGTATAAGAAAAACAAAGACAAGCACATCATCCCAATTCCTTTTTATGCAAAAGATTTCCAGGTATTGAGTACCCTAAATGATATTTTCATTCCAGCCATGGGCAATATTACCTATGACTTTTCTTTTAAGTCAGGCATCATCACACTGAATACCAATGTTGGACTGTATAACCAGTCAGATATTGTTGCTCATTTCCTAACTTCCTCTTCTTCTGTCACTGATACACTGCAGTACAAATTAGAGGGCACCTCAAGTTTGACAAGGAAAAGAGGCTTGAAGCTAGCCACAGCTTTGTCTCTGAATAATAAATTCGTGGAAGGAAATCATGACAGCACTATTAGTTTGACCAAGAAAAACATGGAGGCATCAGTGACAACATCTGCAAAAGTCCAAATTCCTATTTTGAGAATGAATTTCAAGCAAGAACTTAATGGAAATACCAAGTCRAAGCCTACTGTTTCTTCATACATTGAATTAATATATGATCTCAATTCCCCTGAACTGTACTCTACTGCTAAAGGAACAGTCAACCACAAACTCAACTTAGAGAGCCTCACCTCTTACTTTTCCATTGAGTCATCTGCCAAAGGAGATATCAAGGGCTCAGTACTTTCAAGGGAATATTCAGGAACTATTGCCAGTGAGGCCAGCACTTACTTGAATTCCAAGAGTACTCGGTCTTCAGTGAAGCTGCAAGGGACTTCCAAAGTTGATGGTATCTGGAACCCATGAGAGCCCAAGACCTTGACGACTACCTGAACGGCCCGTTCACCGTCGTGGTGAAGGAGTCTTGTGATGGAATGGGAGACGTGAGCGAGAAGCACGGGAGCGGGCCAGCAGTTCCAGAAAAGGCGGTTCGGTTTTCGTTCACGGTCATGAGAATCACTATAGCACACGGCTCAGAAAACGTGAAGGTATTTGAAGAAGTCAAACCCAACTCCGAACTGTGTTGTAAGCCCCTGTGTCTCATGCTGGCCGATGAGTCTGACCACGAGACCCTGACAGCCATCCTGAGCCCCCTCATTGCCGAGAGGGAGGCCATGAAGAGCAGCCAGTTAATGCTTGAGATGGGAGGCATCCTTCGGAGTTTCAAGTTCATCTTCAGGGGCACCGGATATGATGAGAAACTCGTCCGGGAAGTCGAAGGCCTCGAGGCTTCTGGCTCAGTCTACATTTGTACCCTTTGTGATGCCACCCGCCTGGAAGCRTCTCAAAATCTCGTCTTCCACTCCATCACCAGAAGCCACACTGAGAACCTGGAGCGCTATGAGGTCTGGCGTTCTAACCCGTACCACGAGTCCGTGGAAGAGCTGCGGGATCGGGTGAAAGGGGTCTCATCGAAACCTTTCATCGAGACGGTCCCTTCCATAGACGCACTCCACTGTGACATTGGCAATGCAGCTGAGTTCTACAAGATTTTCCAGCTAGAGATAGGGGAGGTGTATAAGAACCCCAATGCCTCCAAAGAGGAAAGGAAAAGATGGCAGGCTACGCTGGACAAGCATCTCCGGAAGAAGATGAACCTGAAACCGATCATGAGGATGAATGGCAACTTTGCCAGGAAGCTCATGACCAGAGAGACAGTTGAAGCAGTGTGTGAATTAATTCCTTCTGAGGACAGGCACGAAGCTCTGAGGGAGCTCATGGACCTTTACCTCAAGATGAAGCCTGTATGGAGATCATCGTGTCCTGCCAAGGAGTGCCCAGAATCTCTCTGCCAGTATAGCTTCAATTCACAGCGTTTTGCTGAGCTCCTCTCTACCAAGTTCAAGTATAGATATGAGGGCAAAATCACTAATTATTTTCACAAAACCCTGGCACA????GCCCATGTGCTGACCACCGGGGTGCAGAGCTCCTTGAACGACCCTCGCCTGGTCATCTCCTATGAGCCCAGCACCCTTGAGGCTCCCCGGCAAGCCCCAGCTCTCACCAACCTCACCCAAGAGGAACTGCTTGCCCGCTTGCAGAAGGGGATCCGCCATGAGGTTCTGGAGGGCAATGTGGGCTACCTGCGTGTGGACGACATCCCAGGCCAGGAGGTGGTGAGCAAGCTGGGGGGCTTCCTGGTGGCCAGTGTCTGGAGGAAGCTCATGGGCACCTCCGCCTTGGTGCTGGACCTCCGGCACTGCACTGGGGGCCACATTTCCGGTATCCCCTACTTCATCTCCTACCTACACCCAGGAAACACGGTCCTGCACGTGGATACCATCTACGACCGCCCCTCCAATACGACCACTGAGATCTGGACCCTGCCCCAAGTCCTGGGAGAAAGGTACAGTTCCAACAAGGATGTGGTGGTCCTCACCAGCGGCCACACGGGGGGCGTGGCTGAAGATATCACTTACATCCTCAAACAGATGCGCAGGGCCATCGTGGTGGGCGAGCGGACTGGGGGGGGCGCCCTGGACCTCCAGAAGCTGAGGATAGGCCAGTCTGACTTCTTCCTCACTGTGCCCGTGTCCAGGTCCCTAGGGCCCTTGGGAGGGGGCAGCCAGACCTGGGAGGGCAGCGGAGTGCTGCCCTGTGTGGGGACACCAGCTGAGCAGGCCCTGGAGAAAGCCCTGGCCATCCTCACTCTGCGCCGGGCCCTGCCCGGAGTCGTGCAGCACCTGCAGGGAGCGCTGCAGGCCTACTATACGCTGGTGGACCGCGTGCCTGCCCTGCTGCACCATCTGGCCAACATGGACTTCTCTTCGGTGGTCTCCGAGGAGGACCTGGTCGCGAAGCTCAACTCAGGTCTGCAAACTGCATCTGAGGACCCCAGGCTCCTGGTGCGGGCCGTCAGGCCCAAGGAAACCCCTTCTGGGCCTGAGGTTGGAGAGGATGAACCTCTGGAGGTGGTCCCCACAGTGCCCGACGATGAGGCTGCCCGGCAGGCCCTGGTGGGCACTATGTTCCAGGTGTCGGTGCTGCCAGGCAACGTGGGCTACCTCCGCTTTGACAGCTTTGCTGACGCCTCAGTGCTGGAGGTGCTGAGCCCCTACATCGTGCGTCAGGTGTGGGGGCCCCTG(0 1)00?1000100010200000012000002100000000002002111000102001010000000000000000010010001000000001130000001002000000001000000101122020000211010(0 1)10011?00000?1000000??00000?00?000000100?00000000011?0000?00?100211

Promartes_sp ??????????????????????????????????????????????????????????????????????????????????????????????????????????????????????????????????????????????????????????????????????????????????????????????????????????????????????????????????????????????????????????????????????????????????????????????????????????????????????????????????????????????????????????????????????????????????????????????????????????????????????????????????????????????????????????????????????????????????????????????????????????????????????????????????????????????????????????????????????????????????????????????????????????????????????????????????????????????????????????????????????????????????????????????????????????????????????????????????????????????????????????????????????????????????????????????????????????????????????????????????????????????????????????????????????????????????????????????????????????????????????????????????????????????????????????????????????????????????????????????????????????????????????????????????????????????????????????????????????????????????????????????????????????????????????????????????????????????????????????????????????????????????????????????????????????????????????????????????????????????????????????????????????????????????????????????????????????????????????????????????????????????????????????????????????????????????????????????????????????????????????????????????????????????????????????????????????????????????????????????????????????????????????????????????????????????????????????????????????????????????????????????????????????????????????????????????????????????????????????????????????????????????????????????????????????????????????????????????????????????????????????????????????????????????????????????????????????????????????????????????????????????????????????????????????????????????????????????????????????????????????????????????????????????????????????????????????????????????????????????????????????????????????????????????????????????????????????????????????????????????????????????????????????????????????????????????????????????????????????????????????????????????????????????????????????????????????????????????????????????????????????????????????????????????????????????????????????????????????????????????????????????????????????????????????????????????????????????????????????????????????????????????????????????????????????????????????????????????????????????????????????????????????????????????????????????????????????????????????????????????????????????????????????????????????????????????????????????????????????????????????????????????????????????????????????????????????????????????????????????????????????????????????????????????????????????????????????????????????????????????????????????????????????????????????????????????????????????????????????????????????????????????????????????????????????????????????????????????????????????????????????????????????????????????????????????????????????????????????????????????????????????????????????????????????????????????????????????????????????????????????????????????????????????????????????????????????????????????????????????????????????????????????????????????????????????????????????????????????????????????????????????????????????????????????????????????????????????????????????????????????????????????????????????????????????????????????????????????????????????????????????????????????????????????????????????????????????????????????????????????????????????????????????????????????????????????????????????????????????????????????????????????????????????????????????????????????????????????????????????????????????????????????????????????????????????????????????????????????????????????????????????????????????????????????????????????????????????????????????????????????????????????????????????????????????????????????????????????????????????????????????????????????????????????????????????????????????????????????????????????????????????????????????????????????????????????????????????????????????????????????????????????????????????????????????????????????????????????????????????????????????????????????????????????????????????????????????????????????????????????????????????????????????????????????????????????????????????????????????????????????????????????????????????????????????????????????????????????????????????????????????????????????????????????????????????????????????????????????????????????????????????????????????????????????????????????????????????????????????????????????????????????????????????????????????????????????????????????????????????????????????????????????????????????????????????????????????????????????????????????????????????????????????????????????????????????????????????????????????????????????????????????????????????????????????????????????????????????????????????????????????????????????????????????????????????????????????????????????????????????????????????????????????????????????????????????????????????????????????????????????????????????????????????????????????????????????????????????????????????????????????????????????????????????????????????????????????????????????????????????????????????????????????????????????????????????????????????????????????????????????????????????????????????????????????????????????????????????????????????????????????????????????????????????????????????????????????????????????????????????????????????????????????????????????????????????????????????????????????????????????????????????????????????????????????????????000?000000010?200?0?0010?000?10000000000?000?100?01000??010000?0?0000000?0???010?0000000000100000120020110010???1?00000210101111?1?2??0??0??010????000?01?0??00?0??00?0????010100000?00?0?1??????00?????????

Promephitis_sp ??????????????????????????????????????????????????????????????????????????????????????????????????????????????????????????????????????????????????????????????????????????????????????????????????????????????????????????????????????????????????????????????????????????????????????????????????????????????????????????????????????????????????????????????????????????????????????????????????????????????????????????????????????????????????????????????????????????????????????????????????????????????????????????????????????????????????????????????????????????????????????????????????????????????????????????????????????????????????????????????????????????????????????????????????????????????????????????????????????????????????????????????????????????????????????????????????????????????????????????????????????????????????????????????????????????????????????????????????????????????????????????????????????????????????????????????????????????????????????????????????????????????????????????????????????????????????????????????????????????????????????????????????????????????????????????????????????????????????????????????????????????????????????????????????????????????????????????????????????????????????????????????????????????????????????????????????????????????????????????????????????????????????????????????????????????????????????????????????????????????????????????????????????????????????????????????????????????????????????????????????????????????????????????????????????????????????????????????????????????????????????????????????????????????????????????????????????????????????????????????????????????????????????????????????????????????????????????????????????????????????????????????????????????????????????????????????????????????????????????????????????????????????????????????????????????????????????????????????????????????????????????????????????????????????????????????????????????????????????????????????????????????????????????????????????????????????????????????????????????????????????????????????????????????????????????????????????????????????????????????????????????????????????????????????????????????????????????????????????????????????????????????????????????????????????????????????????????????????????????????????????????????????????????????????????????????????????????????????????????????????????????????????????????????????????????????????????????????????????????????????????????????????????????????????????????????????????????????????????????????????????????????????????????????????????????????????????????????????????????????????????????????????????????????????????????????????????????????????????????????????????????????????????????????????????????????????????????????????????????????????????????????????????????????????????????????????????????????????????????????????????????????????????????????????????????????????????????????????????????????????????????????????????????????????????????????????????????????????????????????????????????????????????????????????????????????????????????????????????????????????????????????????????????????????????????????????????????????????????????????????????????????????????????????????????????????????????????????????????????????????????????????????????????????????????????????????????????????????????????????????????????????????????????????????????????????????????????????????????????????????????????????????????????????????????????????????????????????????????????????????????????????????????????????????????????????????????????????????????????????????????????????????????????????????????????????????????????????????????????????????????????????????????????????????????????????????????????????????????????????????????????????????????????????????????????????????????????????????????????????????????????????????????????????????????????????????????????????????????????????????????????????????????????????????????????????????????????????????????????????????????????????????????????????????????????????????????????????????????????????????????????????????????????????????????????????????????????????????????????????????????????????????????????????????????????????????????????????????????????????????????????????????????????????????????????????????????????????????????????????????????????????????????????????????????????????????????????????????????????????????????????????????????????????????????????????????????????????????????????????????????????????????????????????????????????????????????????????????????????????????????????????????????????????????????????????????????????????????????????????????????????????????????????????????????????????????????????????????????????????????????????????????????????????????????????????????????????????????????????????????????????????????????????????????????????????????????????????????????????????????????????????????????????????????????????????????????????????????????????????????????????????????????????????????????????????????????????????????????????????????????????????????????????????????????????????????????????????????????????????????????????????????????????????????????????????????????????????????????????????????????????????????????????????????????????????????????????????????????????????????????????????????????????????????????????????????????????????????????????????????????????????????????????????????????????????????????????????????????????????????????????????????????????????????????????????????????????????????????????????????????????????????????????????????????????????????0001010010?0??2?000?0?????00?1000?0001100020?100001021?0000???????000???0????0100?100?01000017200020100(0 1)0202????10??1000?102(0 2)11?1132????????????????????????????????????????????????????????????????????????

Proneotherium_repenningi ??????????????????????????????????????????????????????????????????????????????????????????????????????????????????????????????????????????????????????????????????????????????????????????????????????????????????????????????????????????????????????????????????????????????????????????????????????????????????????????????????????????????????????????????????????????????????????????????????????????????????????????????????????????????????????????????????????????????????????????????????????????????????????????????????????????????????????????????????????????????????????????????????????????????????????????????????????????????????????????????????????????????????????????????????????????????????????????????????????????????????????????????????????????????????????????????????????????????????????????????????????????????????????????????????????????????????????????????????????????????????????????????????????????????????????????????????????????????????????????????????????????????????????????????????????????????????????????????????????????????????????????????????????????????????????????????????????????????????????????????????????????????????????????????????????????????????????????????????????????????????????????????????????????????????????????????????????????????????????????????????????????????????????????????????????????????????????????????????????????????????????????????????????????????????????????????????????????????????????????????????????????????????????????????????????????????????????????????????????????????????????????????????????????????????????????????????????????????????????????????????????????????????????????????????????????????????????????????????????????????????????????????????????????????????????????????????????????????????????????????????????????????????????????????????????????????????????????????????????????????????????????????????????????????????????????????????????????????????????????????????????????????????????????????????????????????????????????????????????????????????????????????????????????????????????????????????????????????????????????????????????????????????????????????????????????????????????????????????????????????????????????????????????????????????????????????????????????????????????????????????????????????????????????????????????????????????????????????????????????????????????????????????????????????????????????????????????????????????????????????????????????????????????????????????????????????????????????????????????????????????????????????????????????????????????????????????????????????????????????????????????????????????????????????????????????????????????????????????????????????????????????????????????????????????????????????????????????????????????????????????????????????????????????????????????????????????????????????????????????????????????????????????????????????????????????????????????????????????????????????????????????????????????????????????????????????????????????????????????????????????????????????????????????????????????????????????????????????????????????????????????????????????????????????????????????????????????????????????????????????????????????????????????????????????????????????????????????????????????????????????????????????????????????????????????????????????????????????????????????????????????????????????????????????????????????????????????????????????????????????????????????????????????????????????????????????????????????????????????????????????????????????????????????????????????????????????????????????????????????????????????????????????????????????????????????????????????????????????????????????????????????????????????????????????????????????????????????????????????????????????????????????????????????????????????????????????????????????????????????????????????????????????????????????????????????????????????????????????????????????????????????????????????????????????????????????????????????????????????????????????????????????????????????????????????????????????????????????????????????????????????????????????????????????????????????????????????????????????????????????????????????????????????????????????????????????????????????????????????????????????????????????????????????????????????????????????????????????????????????????????????????????????????????????????????????????????????????????????????????????????????????????????????????????????????????????????????????????????????????????????????????????????????????????????????????????????????????????????????????????????????????????????????????????????????????????????????????????????????????????????????????????????????????????????????????????????????????????????????????????????????????????????????????????????????????????????????????????????????????????????????????????????????????????????????????????????????????????????????????????????????????????????????????????????????????????????????????????????????????????????????????????????????????????????????????????????????????????????????????????????????????????????????????????????????????????????????????????????????????????????????????????????????????????????????????????????????????????????????????????????????????????????????????????????????????????????????????????????????????????????????????????????????????????????????????????????????????????????????????????????????????????????????????????????????????????????????????????????????????????????????????????????????????????????????????????????????????????????????????????????????????????????????????????????????????????????002112000211023?13101?000000302010110???2110?130?1000???110?1?????00010??????011201011001010120(0 1)1?????????010???11000111111101?????200??0?11????????????????????0?????10???1?0???0?1?00?10100010110111??????

Prototaria_sp ??????????????????????????????????????????????????????????????????????????????????????????????????????????????????????????????????????????????????????????????????????????????????????????????????????????????????????????????????????????????????????????????????????????????????????????????????????????????????????????????????????????????????????????????????????????????????????????????????????????????????????????????????????????????????????????????????????????????????????????????????????????????????????????????????????????????????????????????????????????????????????????????????????????????????????????????????????????????????????????????????????????????????????????????????????????????????????????????????????????????????????????????????????????????????????????????????????????????????????????????????????????????????????????????????????????????????????????????????????????????????????????????????????????????????????????????????????????????????????????????????????????????????????????????????????????????????????????????????????????????????????????????????????????????????????????????????????????????????????????????????????????????????????????????????????????????????????????????????????????????????????????????????????????????????????????????????????????????????????????????????????????????????????????????????????????????????????????????????????????????????????????????????????????????????????????????????????????????????????????????????????????????????????????????????????????????????????????????????????????????????????????????????????????????????????????????????????????????????????????????????????????????????????????????????????????????????????????????????????????????????????????????????????????????????????????????????????????????????????????????????????????????????????????????????????????????????????????????????????????????????????????????????????????????????????????????????????????????????????????????????????????????????????????????????????????????????????????????????????????????????????????????????????????????????????????????????????????????????????????????????????????????????????????????????????????????????????????????????????????????????????????????????????????????????????????????????????????????????????????????????????????????????????????????????????????????????????????????????????????????????????????????????????????????????????????????????????????????????????????????????????????????????????????????????????????????????????????????????????????????????????????????????????????????????????????????????????????????????????????????????????????????????????????????????????????????????????????????????????????????????????????????????????????????????????????????????????????????????????????????????????????????????????????????????????????????????????????????????????????????????????????????????????????????????????????????????????????????????????????????????????????????????????????????????????????????????????????????????????????????????????????????????????????????????????????????????????????????????????????????????????????????????????????????????????????????????????????????????????????????????????????????????????????????????????????????????????????????????????????????????????????????????????????????????????????????????????????????????????????????????????????????????????????????????????????????????????????????????????????????????????????????????????????????????????????????????????????????????????????????????????????????????????????????????????????????????????????????????????????????????????????????????????????????????????????????????????????????????????????????????????????????????????????????????????????????????????????????????????????????????????????????????????????????????????????????????????????????????????????????????????????????????????????????????????????????????????????????????????????????????????????????????????????????????????????????????????????????????????????????????????????????????????????????????????????????????????????????????????????????????????????????????????????????????????????????????????????????????????????????????????????????????????????????????????????????????????????????????????????????????????????????????????????????????????????????????????????????????????????????????????????????????????????????????????????????????????????????????????????????????????????????????????????????????????????????????????????????????????????????????????????????????????????????????????????????????????????????????????????????????????????????????????????????????????????????????????????????????????????????????????????????????????????????????????????????????????????????????????????????????????????????????????????????????????????????????????????????????????????????????????????????????????????????????????????????????????????????????????????????????????????????????????????????????????????????????????????????????????????????????????????????????????????????????????????????????????????????????????????????????????????????????????????????????????????????????????????????????????????????????????????????????????????????????????????????????????????????????????????????????????????????????????????????????????????????????????????????????????????????????????????????????????????????????????????????????????????????????????????????????????????????????????????????????????????????????????????????????????????????????????????????????????????????????????????????????????????????????????????????????????????????????????????????????????????????????002112?002111?3?1210(1 2)21?0000302?1??10???211031?021000??00???1??1?1?0??????????????1??000???????01?????????010???1?0?????????????????????????????????????????????????????????????????????????????????????????

Pteronarctos_goedertae ??????????????????????????????????????????????????????????????????????????????????????????????????????????????????????????????????????????????????????????????????????????????????????????????????????????????????????????????????????????????????????????????????????????????????????????????????????????????????????????????????????????????????????????????????????????????????????????????????????????????????????????????????????????????????????????????????????????????????????????????????????????????????????????????????????????????????????????????????????????????????????????????????????????????????????????????????????????????????????????????????????????????????????????????????????????????????????????????????????????????????????????????????????????????????????????????????????????????????????????????????????????????????????????????????????????????????????????????????????????????????????????????????????????????????????????????????????????????????????????????????????????????????????????????????????????????????????????????????????????????????????????????????????????????????????????????????????????????????????????????????????????????????????????????????????????????????????????????????????????????????????????????????????????????????????????????????????????????????????????????????????????????????????????????????????????????????????????????????????????????????????????????????????????????????????????????????????????????????????????????????????????????????????????????????????????????????????????????????????????????????????????????????????????????????????????????????????????????????????????????????????????????????????????????????????????????????????????????????????????????????????????????????????????????????????????????????????????????????????????????????????????????????????????????????????????????????????????????????????????????????????????????????????????????????????????????????????????????????????????????????????????????????????????????????????????????????????????????????????????????????????????????????????????????????????????????????????????????????????????????????????????????????????????????????????????????????????????????????????????????????????????????????????????????????????????????????????????????????????????????????????????????????????????????????????????????????????????????????????????????????????????????????????????????????????????????????????????????????????????????????????????????????????????????????????????????????????????????????????????????????????????????????????????????????????????????????????????????????????????????????????????????????????????????????????????????????????????????????????????????????????????????????????????????????????????????????????????????????????????????????????????????????????????????????????????????????????????????????????????????????????????????????????????????????????????????????????????????????????????????????????????????????????????????????????????????????????????????????????????????????????????????????????????????????????????????????????????????????????????????????????????????????????????????????????????????????????????????????????????????????????????????????????????????????????????????????????????????????????????????????????????????????????????????????????????????????????????????????????????????????????????????????????????????????????????????????????????????????????????????????????????????????????????????????????????????????????????????????????????????????????????????????????????????????????????????????????????????????????????????????????????????????????????????????????????????????????????????????????????????????????????????????????????????????????????????????????????????????????????????????????????????????????????????????????????????????????????????????????????????????????????????????????????????????????????????????????????????????????????????????????????????????????????????????????????????????????????????????????????????????????????????????????????????????????????????????????????????????????????????????????????????????????????????????????????????????????????????????????????????????????????????????????????????????????????????????????????????????????????????????????????????????????????????????????????????????????????????????????????????????????????????????????????????????????????????????????????????????????????????????????????????????????????????????????????????????????????????????????????????????????????????????????????????????????????????????????????????????????????????????????????????????????????????????????????????????????????????????????????????????????????????????????????????????????????????????????????????????????????????????????????????????????????????????????????????????????????????????????????????????????????????????????????????????????????????????????????????????????????????????????????????????????????????????????????????????????????????????????????????????????????????????????????????????????????????????????????????????????????????????????????????????????????????????????????????????????????????????????????????????????????????????????????????????????????????????????????????????????????????????????????????????????????????????????????????????????????????????????????????????????????????????????????????????????????????????????????????????????????????????????????????????????????????????????????????????????????????????????????????????????????????????????????????????????????????????????????????????????????????????????????????????????????????????????????????????012112100211123(0 1)1(2 3)00(0 3)0100000300010110???21103130?1002???010?10???12?010???02101020101000001002111?????????111???1?000????11101?????2000?0?0??100??02??11????????????????????????????????????????????????????

Pseudobassaris_riggsi ??????????????????????????????????????????????????????????????????????????????????????????????????????????????????????????????????????????????????????????????????????????????????????????????????????????????????????????????????????????????????????????????????????????????????????????????????????????????????????????????????????????????????????????????????????????????????????????????????????????????????????????????????????????????????????????????????????????????????????????????????????????????????????????????????????????????????????????????????????????????????????????????????????????????????????????????????????????????????????????????????????????????????????????????????????????????????????????????????????????????????????????????????????????????????????????????????????????????????????????????????????????????????????????????????????????????????????????????????????????????????????????????????????????????????????????????????????????????????????????????????????????????????????????????????????????????????????????????????????????????????????????????????????????????????????????????????????????????????????????????????????????????????????????????????????????????????????????????????????????????????????????????????????????????????????????????????????????????????????????????????????????????????????????????????????????????????????????????????????????????????????????????????????????????????????????????????????????????????????????????????????????????????????????????????????????????????????????????????????????????????????????????????????????????????????????????????????????????????????????????????????????????????????????????????????????????????????????????????????????????????????????????????????????????????????????????????????????????????????????????????????????????????????????????????????????????????????????????????????????????????????????????????????????????????????????????????????????????????????????????????????????????????????????????????????????????????????????????????????????????????????????????????????????????????????????????????????????????????????????????????????????????????????????????????????????????????????????????????????????????????????????????????????????????????????????????????????????????????????????????????????????????????????????????????????????????????????????????????????????????????????????????????????????????????????????????????????????????????????????????????????????????????????????????????????????????????????????????????????????????????????????????????????????????????????????????????????????????????????????????????????????????????????????????????????????????????????????????????????????????????????????????????????????????????????????????????????????????????????????????????????????????????????????????????????????????????????????????????????????????????????????????????????????????????????????????????????????????????????????????????????????????????????????????????????????????????????????????????????????????????????????????????????????????????????????????????????????????????????????????????????????????????????????????????????????????????????????????????????????????????????????????????????????????????????????????????????????????????????????????????????????????????????????????????????????????????????????????????????????????????????????????????????????????????????????????????????????????????????????????????????????????????????????????????????????????????????????????????????????????????????????????????????????????????????????????????????????????????????????????????????????????????????????????????????????????????????????????????????????????????????????????????????????????????????????????????????????????????????????????????????????????????????????????????????????????????????????????????????????????????????????????????????????????????????????????????????????????????????????????????????????????????????????????????????????????????????????????????????????????????????????????????????????????????????????????????????????????????????????????????????????????????????????????????????????????????????????????????????????????????????????????????????????????????????????????????????????????????????????????????????????????????????????????????????????????????????????????????????????????????????????????????????????????????????????????????????????????????????????????????????????????????????????????????????????????????????????????????????????????????????????????????????????????????????????????????????????????????????????????????????????????????????????????????????????????????????????????????????????????????????????????????????????????????????????????????????????????????????????????????????????????????????????????????????????????????????????????????????????????????????????????????????????????????????????????????????????????????????????????????????????????????????????????????????????????????????????????????????????????????????????????????????????????????????????????????????????????????????????????????????????????????????????????????????????????????????????????????????????????????????????????????????????????????????????????????????????????????????????????????????????????????????????????????????????????????????????????????????????????????????????????????????????????????????????????????????????????????????????????????????????????????????????????????????????????????????????????????????????????????????????????????????????????????????????????????????????????????????????????????????????????????????????????????????????????????000000001000??200?00001???00?0001?000????022?100?00000???10?10???000000???????????1000000001010000200200000?0???1?0??????????????????????0??????????????????????????????????????????????????????????????????

Puijila_darwini ??????????????????????????????????????????????????????????????????????????????????????????????????????????????????????????????????????????????????????????????????????????????????????????????????????????????????????????????????????????????????????????????????????????????????????????????????????????????????????????????????????????????????????????????????????????????????????????????????????????????????????????????????????????????????????????????????????????????????????????????????????????????????????????????????????????????????????????????????????????????????????????????????????????????????????????????????????????????????????????????????????????????????????????????????????????????????????????????????????????????????????????????????????????????????????????????????????????????????????????????????????????????????????????????????????????????????????????????????????????????????????????????????????????????????????????????????????????????????????????????????????????????????????????????????????????????????????????????????????????????????????????????????????????????????????????????????????????????????????????????????????????????????????????????????????????????????????????????????????????????????????????????????????????????????????????????????????????????????????????????????????????????????????????????????????????????????????????????????????????????????????????????????????????????????????????????????????????????????????????????????????????????????????????????????????????????????????????????????????????????????????????????????????????????????????????????????????????????????????????????????????????????????????????????????????????????????????????????????????????????????????????????????????????????????????????????????????????????????????????????????????????????????????????????????????????????????????????????????????????????????????????????????????????????????????????????????????????????????????????????????????????????????????????????????????????????????????????????????????????????????????????????????????????????????????????????????????????????????????????????????????????????????????????????????????????????????????????????????????????????????????????????????????????????????????????????????????????????????????????????????????????????????????????????????????????????????????????????????????????????????????????????????????????????????????????????????????????????????????????????????????????????????????????????????????????????????????????????????????????????????????????????????????????????????????????????????????????????????????????????????????????????????????????????????????????????????????????????????????????????????????????????????????????????????????????????????????????????????????????????????????????????????????????????????????????????????????????????????????????????????????????????????????????????????????????????????????????????????????????????????????????????????????????????????????????????????????????????????????????????????????????????????????????????????????????????????????????????????????????????????????????????????????????????????????????????????????????????????????????????????????????????????????????????????????????????????????????????????????????????????????????????????????????????????????????????????????????????????????????????????????????????????????????????????????????????????????????????????????????????????????????????????????????????????????????????????????????????????????????????????????????????????????????????????????????????????????????????????????????????????????????????????????????????????????????????????????????????????????????????????????????????????????????????????????????????????????????????????????????????????????????????????????????????????????????????????????????????????????????????????????????????????????????????????????????????????????????????????????????????????????????????????????????????????????????????????????????????????????????????????????????????????????????????????????????????????????????????????????????????????????????????????????????????????????????????????????????????????????????????????????????????????????????????????????????????????????????????????????????????????????????????????????????????????????????????????????????????????????????????????????????????????????????????????????????????????????????????????????????????????????????????????????????????????????????????????????????????????????????????????????????????????????????????????????????????????????????????????????????????????????????????????????????????????????????????????????????????????????????????????????????????????????????????????????????????????????????????????????????????????????????????????????????????????????????????????????????????????????????????????????????????????????????????????????????????????????????????????????????????????????????????????????????????????????????????????????????????????????????????????????????????????????????????????????????????????????????????????????????????????????????????????????????????????????????????????????????????????????????????????????????????????????????????????????????????????????????????????????????????????????????????????????????????????????????????????????????????????????????????????????????????????????????????????????????????????????????????????????????????????????????????????????????????????????????????????????????????????????????????????????????????????????????????????????????????????????????????????????????????????????????????????????????????????????????????????002111100?01??30??0?0?2??000300?10??????2??03130210021000101001??000010000???0000000??0000010710012000010001121011000001120001100132000100100101??0000010100210001000010000000100101001001101000?1001??10101

Semantor_macrurus ??????????????????????????????????????????????????????????????????????????????????????????????????????????????????????????????????????????????????????????????????????????????????????????????????????????????????????????????????????????????????????????????????????????????????????????????????????????????????????????????????????????????????????????????????????????????????????????????????????????????????????????????????????????????????????????????????????????????????????????????????????????????????????????????????????????????????????????????????????????????????????????????????????????????????????????????????????????????????????????????????????????????????????????????????????????????????????????????????????????????????????????????????????????????????????????????????????????????????????????????????????????????????????????????????????????????????????????????????????????????????????????????????????????????????????????????????????????????????????????????????????????????????????????????????????????????????????????????????????????????????????????????????????????????????????????????????????????????????????????????????????????????????????????????????????????????????????????????????????????????????????????????????????????????????????????????????????????????????????????????????????????????????????????????????????????????????????????????????????????????????????????????????????????????????????????????????????????????????????????????????????????????????????????????????????????????????????????????????????????????????????????????????????????????????????????????????????????????????????????????????????????????????????????????????????????????????????????????????????????????????????????????????????????????????????????????????????????????????????????????????????????????????????????????????????????????????????????????????????????????????????????????????????????????????????????????????????????????????????????????????????????????????????????????????????????????????????????????????????????????????????????????????????????????????????????????????????????????????????????????????????????????????????????????????????????????????????????????????????????????????????????????????????????????????????????????????????????????????????????????????????????????????????????????????????????????????????????????????????????????????????????????????????????????????????????????????????????????????????????????????????????????????????????????????????????????????????????????????????????????????????????????????????????????????????????????????????????????????????????????????????????????????????????????????????????????????????????????????????????????????????????????????????????????????????????????????????????????????????????????????????????????????????????????????????????????????????????????????????????????????????????????????????????????????????????????????????????????????????????????????????????????????????????????????????????????????????????????????????????????????????????????????????????????????????????????????????????????????????????????????????????????????????????????????????????????????????????????????????????????????????????????????????????????????????????????????????????????????????????????????????????????????????????????????????????????????????????????????????????????????????????????????????????????????????????????????????????????????????????????????????????????????????????????????????????????????????????????????????????????????????????????????????????????????????????????????????????????????????????????????????????????????????????????????????????????????????????????????????????????????????????????????????????????????????????????????????????????????????????????????????????????????????????????????????????????????????????????????????????????????????????????????????????????????????????????????????????????????????????????????????????????????????????????????????????????????????????????????????????????????????????????????????????????????????????????????????????????????????????????????????????????????????????????????????????????????????????????????????????????????????????????????????????????????????????????????????????????????????????????????????????????????????????????????????????????????????????????????????????????????????????????????????????????????????????????????????????????????????????????????????????????????????????????????????????????????????????????????????????????????????????????????????????????????????????????????????????????????????????????????????????????????????????????????????????????????????????????????????????????????????????????????????????????????????????????????????????????????????????????????????????????????????????????????????????????????????????????????????????????????????????????????????????????????????????????????????????????????????????????????????????????????????????????????????????????????????????????????????????????????????????????????????????????????????????????????????????????????????????????????????????????????????????????????????????????????????????????????????????????????????????????????????????????????????????????????????????????????????????????????????????????????????????????????????????????????????????????????????????????????????????????????????????????????????????????????????????????????????????????????????????????????????????????????????????????????????????????????????????????????????????????????????????????????????????????????????????????????????????????????????????????????????????????????????????????????????????????????????????????????????????????????????????????????????????????????????????????????????????????????????????????????????????????0??????1?001??????????????10???110100111?00?001?100011001???????

Simocyon_sp ??????????????????????????????????????????????????????????????????????????????????????????????????????????????????????????????????????????????????????????????????????????????????????????????????????????????????????????????????????????????????????????????????????????????????????????????????????????????????????????????????????????????????????????????????????????????????????????????????????????????????????????????????????????????????????????????????????????????????????????????????????????????????????????????????????????????????????????????????????????????????????????????????????????????????????????????????????????????????????????????????????????????????????????????????????????????????????????????????????????????????????????????????????????????????????????????????????????????????????????????????????????????????????????????????????????????????????????????????????????????????????????????????????????????????????????????????????????????????????????????????????????????????????????????????????????????????????????????????????????????????????????????????????????????????????????????????????????????????????????????????????????????????????????????????????????????????????????????????????????????????????????????????????????????????????????????????????????????????????????????????????????????????????????????????????????????????????????????????????????????????????????????????????????????????????????????????????????????????????????????????????????????????????????????????????????????????????????????????????????????????????????????????????????????????????????????????????????????????????????????????????????????????????????????????????????????????????????????????????????????????????????????????????????????????????????????????????????????????????????????????????????????????????????????????????????????????????????????????????????????????????????????????????????????????????????????????????????????????????????????????????????????????????????????????????????????????????????????????????????????????????????????????????????????????????????????????????????????????????????????????????????????????????????????????????????????????????????????????????????????????????????????????????????????????????????????????????????????????????????????????????????????????????????????????????????????????????????????????????????????????????????????????????????????????????????????????????????????????????????????????????????????????????????????????????????????????????????????????????????????????????????????????????????????????????????????????????????????????????????????????????????????????????????????????????????????????????????????????????????????????????????????????????????????????????????????????????????????????????????????????????????????????????????????????????????????????????????????????????????????????????????????????????????????????????????????????????????????????????????????????????????????????????????????????????????????????????????????????????????????????????????????????????????????????????????????????????????????????????????????????????????????????????????????????????????????????????????????????????????????????????????????????????????????????????????????????????????????????????????????????????????????????????????????????????????????????????????????????????????????????????????????????????????????????????????????????????????????????????????????????????????????????????????????????????????????????????????????????????????????????????????????????????????????????????????????????????????????????????????????????????????????????????????????????????????????????????????????????????????????????????????????????????????????????????????????????????????????????????????????????????????????????????????????????????????????????????????????????????????????????????????????????????????????????????????????????????????????????????????????????????????????????????????????????????????????????????????????????????????????????????????????????????????????????????????????????????????????????????????????????????????????????????????????????????????????????????????????????????????????????????????????????????????????????????????????????????????????????????????????????????????????????????????????????????????????????????????????????????????????????????????????????????????????????????????????????????????????????????????????????????????????????????????????????????????????????????????????????????????????????????????????????????????????????????????????????????????????????????????????????????????????????????????????????????????????????????????????????????????????????????????????????????????????????????????????????????????????????????????????????????????????????????????????????????????????????????????????????????????????????????????????????????????????????????????????????????????????????????????????????????????????????????????????????????????????????????????????????????????????????????????????????????????????????????????????????????????????????????????????????????????????????????????????????????????????????????????????????????????????????????????????????????????????????????????????????????????????????????????????????????????????????????????????????????????????????????????????????????????????????????????????????????????????????????????????????????????????????????????????????????????????????????????????????????????????????????????????????????????????????????????????????????????????????????????????????????????????????????????????????????????????????????????????????????????????????000010001001??10000?0?20?230??0???00????20?1?1?0?10020???????0????01010??????02110?0?01(0 1)00????0010???00200000201100?10?2110003?0?102???1?01?011?10001?1000000??00?00?00???000000000000000?????00?00?????????

Sthenictis_sp ??????????????????????????????????????????????????????????????????????????????????????????????????????????????????????????????????????????????????????????????????????????????????????????????????????????????????????????????????????????????????????????????????????????????????????????????????????????????????????????????????????????????????????????????????????????????????????????????????????????????????????????????????????????????????????????????????????????????????????????????????????????????????????????????????????????????????????????????????????????????????????????????????????????????????????????????????????????????????????????????????????????????????????????????????????????????????????????????????????????????????????????????????????????????????????????????????????????????????????????????????????????????????????????????????????????????????????????????????????????????????????????????????????????????????????????????????????????????????????????????????????????????????????????????????????????????????????????????????????????????????????????????????????????????????????????????????????????????????????????????????????????????????????????????????????????????????????????????????????????????????????????????????????????????????????????????????????????????????????????????????????????????????????????????????????????????????????????????????????????????????????????????????????????????????????????????????????????????????????????????????????????????????????????????????????????????????????????????????????????????????????????????????????????????????????????????????????????????????????????????????????????????????????????????????????????????????????????????????????????????????????????????????????????????????????????????????????????????????????????????????????????????????????????????????????????????????????????????????????????????????????????????????????????????????????????????????????????????????????????????????????????????????????????????????????????????????????????????????????????????????????????????????????????????????????????????????????????????????????????????????????????????????????????????????????????????????????????????????????????????????????????????????????????????????????????????????????????????????????????????????????????????????????????????????????????????????????????????????????????????????????????????????????????????????????????????????????????????????????????????????????????????????????????????????????????????????????????????????????????????????????????????????????????????????????????????????????????????????????????????????????????????????????????????????????????????????????????????????????????????????????????????????????????????????????????????????????????????????????????????????????????????????????????????????????????????????????????????????????????????????????????????????????????????????????????????????????????????????????????????????????????????????????????????????????????????????????????????????????????????????????????????????????????????????????????????????????????????????????????????????????????????????????????????????????????????????????????????????????????????????????????????????????????????????????????????????????????????????????????????????????????????????????????????????????????????????????????????????????????????????????????????????????????????????????????????????????????????????????????????????????????????????????????????????????????????????????????????????????????????????????????????????????????????????????????????????????????????????????????????????????????????????????????????????????????????????????????????????????????????????????????????????????????????????????????????????????????????????????????????????????????????????????????????????????????????????????????????????????????????????????????????????????????????????????????????????????????????????????????????????????????????????????????????????????????????????????????????????????????????????????????????????????????????????????????????????????????????????????????????????????????????????????????????????????????????????????????????????????????????????????????????????????????????????????????????????????????????????????????????????????????????????????????????????????????????????????????????????????????????????????????????????????????????????????????????????????????????????????????????????????????????????????????????????????????????????????????????????????????????????????????????????????????????????????????????????????????????????????????????????????????????????????????????????????????????????????????????????????????????????????????????????????????????????????????????????????????????????????????????????????????????????????????????????????????????????????????????????????????????????????????????????????????????????????????????????????????????????????????????????????????????????????????????????????????????????????????????????????????????????????????????????????????????????????????????????????????????????????????????????????????????????????????????????????????????????????????????????????????????????????????????????????????????????????????????????????????????????????????????????????????????????????????????????????????????????????????????????????????????????????????????????????????????????????????????????????????????????????????????????????????????????????????????????????????????????????????????????????????????????????????????????????????????????????????????????????????????????????????????????????????????????????????????????????????????????000?10000001??20000101101200?1000000???????0?100?0102???010??0?0?000000??????01000000?0000001000000002010202????100000020000111001221?????????????????????0???????????????????????00????0???????????????????

Stromeriella_franconica ??????????????????????????????????????????????????????????????????????????????????????????????????????????????????????????????????????????????????????????????????????????????????????????????????????????????????????????????????????????????????????????????????????????????????????????????????????????????????????????????????????????????????????????????????????????????????????????????????????????????????????????????????????????????????????????????????????????????????????????????????????????????????????????????????????????????????????????????????????????????????????????????????????????????????????????????????????????????????????????????????????????????????????????????????????????????????????????????????????????????????????????????????????????????????????????????????????????????????????????????????????????????????????????????????????????????????????????????????????????????????????????????????????????????????????????????????????????????????????????????????????????????????????????????????????????????????????????????????????????????????????????????????????????????????????????????????????????????????????????????????????????????????????????????????????????????????????????????????????????????????????????????????????????????????????????????????????????????????????????????????????????????????????????????????????????????????????????????????????????????????????????????????????????????????????????????????????????????????????????????????????????????????????????????????????????????????????????????????????????????????????????????????????????????????????????????????????????????????????????????????????????????????????????????????????????????????????????????????????????????????????????????????????????????????????????????????????????????????????????????????????????????????????????????????????????????????????????????????????????????????????????????????????????????????????????????????????????????????????????????????????????????????????????????????????????????????????????????????????????????????????????????????????????????????????????????????????????????????????????????????????????????????????????????????????????????????????????????????????????????????????????????????????????????????????????????????????????????????????????????????????????????????????????????????????????????????????????????????????????????????????????????????????????????????????????????????????????????????????????????????????????????????????????????????????????????????????????????????????????????????????????????????????????????????????????????????????????????????????????????????????????????????????????????????????????????????????????????????????????????????????????????????????????????????????????????????????????????????????????????????????????????????????????????????????????????????????????????????????????????????????????????????????????????????????????????????????????????????????????????????????????????????????????????????????????????????????????????????????????????????????????????????????????????????????????????????????????????????????????????????????????????????????????????????????????????????????????????????????????????????????????????????????????????????????????????????????????????????????????????????????????????????????????????????????????????????????????????????????????????????????????????????????????????????????????????????????????????????????????????????????????????????????????????????????????????????????????????????????????????????????????????????????????????????????????????????????????????????????????????????????????????????????????????????????????????????????????????????????????????????????????????????????????????????????????????????????????????????????????????????????????????????????????????????????????????????????????????????????????????????????????????????????????????????????????????????????????????????????????????????????????????????????????????????????????????????????????????????????????????????????????????????????????????????????????????????????????????????????????????????????????????????????????????????????????????????????????????????????????????????????????????????????????????????????????????????????????????????????????????????????????????????????????????????????????????????????????????????????????????????????????????????????????????????????????????????????????????????????????????????????????????????????????????????????????????????????????????????????????????????????????????????????????????????????????????????????????????????????????????????????????????????????????????????????????????????????????????????????????????????????????????????????????????????????????????????????????????????????????????????????????????????????????????????????????????????????????????????????????????????????????????????????????????????????????????????????????????????????????????????????????????????????????????????????????????????????????????????????????????????????????????????????????????????????????????????????????????????????????????????????????????????????????????????????????????????????????????????????????????????????????????????????????????????????????????????????????????????????????????????????????????????????????????????????????????????????????????????????????????????????????????????????????????????????????????????????????????????????????????????????????????????????????????????????????????????????????????????????????????????????????????????????????????????????????????????????????????????????????????????????????????????????????????????????????????????0000020000010?2?000?0?????30210?0??0100?0032010000101??0010?00?0?00000???0?????????????0?001070?0020000200?100011???0002001210000102????????????????????????????????????????????????????????????????????????

Taxidea_taxus TGGTGCCCCCCACGGAAGGCCCTGTCGGCTCTACCACCCCGTATGTGGAGGACACTCCTGAGCCGCCCCTCCACGACTTCCACTGCAGCCGGCTTCTGGACCTGGTTTTCCTGCTAGACGGCTCCTCCAAGCTGTCTGAGAGCGAGTTCGAAGTGCTGAAGGTCTTCGTGGTGGGCATGATGGAGCATCTGCACATCTCCCAGAAGCGCATCCGCGTGGCTGTGGTGGAGTACCATGACGGCTCCCACGCCTACATTGAGCTCCGGGACCGGAAGCGGCCCTCGGAGCTGCGGCGCATCGCCAGCCAAGTGAGGTACGTGGGCAGCGAGGTGGCCTCCACCAGCGAGGTCCTCAAGTACACACTGTTCCAGATCTTCGGCAAGATTGACCGCCCTGAAGCATCCCGTATCGTCCTGCTCCTCACGGCCAGCCAGGAGCCCCCAAGGCTGGCCCGCAATTTGGTCCGCTACGTGCAGGGCCTGAAGAAGAAGAAAGTCATCATGATCCCCGTGGGCATCGGGCCCCACGCCAACCTCAAGCAGATCCGCAACATTGAGAAGCAGGCCCCCGAGAACAAGGCCTTTGTGCTCAGCGGTGTGGACGAGCTGGAGCAGCGGAGGGATGAGATTATCAGCTACCTCTGTGACCTGGCCCCTGAAGCACCCGGTCCTACCCAGCAGCCCCCTGTGTTGCCAGTCACTGTGGGTCCGGAGCTCTTGGGGGTCCCATCGTCGGGACCCAGAAGGAACTCCATGGTTCTGGATGTGGTGTTCGTCCTGGAAGGCTCAGACAAAATTGGAGAGGCCAACTTCAACAAGAGCAGGGACTTCATAGAGGAGGTGATCCGACGGATGGATGTGGGCCAGGACGGCATCCATGTCACGGTGCTGCAGTACTCCTACACCGTGGCCGTGGAATACACCTTCAGCGAAGCCCAGTCCAAGGGTGAGGTCCTGCAGCATGTGCGGGAGATCCGATTCCGGGGCGGCAACAGGACCAACACTGGGCTGGCCCTGCAGTACCTATCTGAGCACAGTTTCTCCGTCAGCCAGGGGGACCGGGAGCAGGTCCCTAACCTGGTCTACATGGTCACGGGAAACCCCGCCTCTGATGAGATCAAGCGGATGCCTGGAGACATCCAGGTGGTGCCCATTGGAGTGGGCCCTCACGCCGAGGTGCAGGAGCTGGAGATAAAGACAGAATGAATGTAGAAAAGGCTGAATTCTGTAATAAAAGCAAACAGCCTGCCTTAGCAAGGAGCCAACAGAGCAGATGGGCCGAAAGTAAGGAAACATGTACCGATAAGCAGACTCCCAGCACAGAGAGAAAGGTACTTCTGAAAGTCGATCCCCTGTGTGGGAGAAGAGAACCGAAGAAGCAGAAACCTCCATGCTCTGACAGTCCTAGAGATTCCCAAGATGTTCCTTGGATAACACTGAATAGCAGCATACAGAAAGTGAACGAGTGGTTTTCCAGAAGCGATGAAATGTTGACTTCC---GATGACTCACAGGATGGGGGGTCTGAATCGAAGACCGAAGTAGCTGGTGCAGTAGAAGTTCCAAATGAAGTACATGTATGTTCCACTTCTTCTGAGAAAATAGACTTAATGGCCAGCGAGTCTCAGGATGCTTTGATACGTGAAAGCGAAAGAGTCCACACCAAGTCAGTAGAGAGTAACATCGAAGATAAAATATTTGGGAAGACCTACCGGAGGAAGGCAAGCCTCCTTAATGTGAGCCACATGAGCGAAGATCTGGTTATAGGAGCATGTGCCATAGAACCTCAGACAACGCAAGCCCATCCCCTCACGAGTAAAGCAAAGCGTAAAAGGAGAACTACAGCAGGCCTTCATCCTGAGGATTTTATCAAGAGAGTAGATTTGGCCGTCGTTCCAAAGGCTCCTGAAAAGCTAGTTGAGGGAACCGACCAAATCGAGCGAAGTGGTCACGTGACGAATATTAGAAATAATGGTCCTGAGGATGAAATAAAAGGTGATTATGTTCAGACTGAGAAAAATGCTAACCCAACAGAATCCCTGGAAAAAGAATCTGCTCTCAGAAGCAGAGCTGAACCGATAAGCAGCAGCATAAGCAATATGGAACTGGAATTAAATAGCTCCGGCTCGAAAGCCCTTAGGAAGAACAGGCTGCGGAGGAAGTCCTCCACCAGGCATGGCTGTGTGCTTGAATTCGTAGTCAGTCGAAATCCAAGCCCGCCTGCTCACAGCGAACTACAGAACCATCAGAATTTCTCTGCTGGAAACAATGAGAACAGCATTGAGGCCCACGTAGGAATACATGGAGAAGCCAACCTGGATTTCCTCAACATTCCTTTGACAATTCCTGAAATGACTCTACCTTACACAACACTCACAACTCCCCAGGTGAAAGATTTCTCCCTTTGGGAAAAAACAGGCTTAAAGGATTTCTTGAAGACAACAAAGCAATCATTTGATTTAAGTGTAAAGGCTCAGTATAAGAAAAACAAAGACAAGCACATCATCCCAATTCCTTTTTATGCAAAAGATTTCCAGGTATTGAGTACCTCAAATGATATTTTCATTCCAGCCATGGGCAATATTACCTATGACTTTTCCTTTAAGTCAGGCATCATCACACTGAATACCAATGTTGGACTGTATAACCAGTCAGATATTGTTGCTCATTTCCTAACTTCCTCTTCTTCTGTCACTGATGCTCTGCAGTACAAATTAGAGGGCACCTCAAGTTTGACGAGGAAAAGAGGCTTGAAGCTAGCCACAGCTTTGTCTCTGAGTAGTAAATTTGTGGAAGGAAATCATGACAGTACTATTAGTTTGACCAAGAAAAACATGGAGGCATCAGTGACAACATCTGCAGAAGTCCAAACTCCTATTTTGAGGATGAATTTCAAGCAAGAACTTAATGGAAATACCAAGTCGAAGCCTACTGTCTCTTCATCCATTGAATTAATGTATGATCTCAAT---------------TCTACTGCTACAGGAACAATCAACCACAAACTCAACTTAGAGAGCCTCACCTCTTACTTTTCCATTGAGTCATCTACCAAAGGAGATATCAAGGGCTCAGTACTTTCAATAGAATATTCAGGAACTATTGWCAGCGAGGCYAGCGCTTACTTGAATTCCAAGAGTACTCGGTCTTCAGTGAAGCTGCAAGGGGCTTCCAAAGTTGATGGTATCTGGAACCCATGAGAGCCCAAGACCTGGATGACTACCTGACGGGCCCCTTCACCGTCGTGGTGAAGGAGTCTTGCGACGGAATGGGAGACGTGAGCGAGAAGCACGGGAGCGGGCCCGCAGTTCCAGAAAAGGCAGTTCGGTTTTCGTTCACGGTCATGAAAATTATGATAGCACATGGCTCAGAAAGCGTGAAGGTGTTTGAAGAA?TCAAACCCAACTCCGAGCTGTGTTGTAAGCCCCTGTGTCTCATGCTGGCGGATGAGTCCGACCACGAGACCCTGACGGCCATCCTGAGCCCTCTCATTGCTGAGAGGGAGGCCATGAAGAGCAGCCAATTAATGCTTGAGATGGGAGGCATCCTTCGGAGTTTCAAGTTCATCTTCAGGGGCACCGGCTACGATGAGAAACTCGTCCGGGAAGTCGAAGGCCTCGAGGCTTCTGGCTCAGTCTACATTTGTACCCTTTGCGACGCCACCCGCCTAGAAGCATCTCAAAATCTTGTCTTCCACTCCATCACCAGAAGCCACGCTGAGAACCTGGAGCGCTATGAGGTCTGGCGTTCTAACCCATACCACGAGTCCGTGGAAGAGCTGCGGGATCGGGTGAAAGGGGTCTCATCGAAACCTTTCATCGAGACGGTCCCTTCCATAGATGCGCTCCACTGTGACATTGGCAATGCAGCTGAGTTCTACAAGATTTTCCAGCTAGAGATAGGGGAGGTGTATAAGAATCCCAATGCCTCCAAAGAGGAAAGGAAAAGATGGCAGGCTATGTTGGACAAACATCTCCGGAAGAAGATGAGCCTGAAACCCATCATGAGGATGAATGGCAACTTTGCCAGGAAGCTCATGACCAAAGAGACAGTTGAAGCAGTCTGTGAGTTAATTCCCTCTGAGGAGAGGCACGAAGCTCTGAGGGAGCTGATGGACCTTTACCTTAAGATGAAGCCTGTGTGGCGGTCATCGTGTCCTGCCAAAGAGTGCCCAGAATCTCTCTGCCAGTATAGCTTCAATTCACAGCGTTTTGCTGAGCTCCTCTCTACCAAGTTCAAGTATAGATATGAGGGCAAAATCACCAATTATTTTCACAAAACCCTGGCACA????GCCCATGTGCTGACCACCGGGGTGCAGAGCTCCTTGAACGACCCTCGCCTTGTCATCTCCTATGAGCCCAGCACCCTTGAGGCTCCCCGGCAAGCTCCAGCCCTCACCAACCTCACTCAAGAGGAACTGCTTGCCCACTTGCAGAAGGGCATCCGCCACGAGGTTCTGGAGGGCAATGTGGGCTACTTGCGTGTGGATGACATCCCAGGCCAGGAGGTGGTGAGCAAGCTGGGGGGCTTCCTTGTGGCCAGCRTCTGGAGGAAGCTCATGGGCACTTCCGCCTTGGTGCTAGACCTCCGACACTGCACTGGGGGCCACATTTCTGGTATCCCCTACTTCATCTCCTACCTGCACCCAGGGAACACAGTCCTGCACGTGGATACCATCTACGACCGCCCCTCTAATACGACCACTGAGATCTGGACCCTGCCCCAGGTCCTGGGAGAAAGGTACAGTGCGGACAAGGATGTGGTGGTCCTCACCAGTGGCCACACGGGAGGCGTGGCTGAGGACATCACTTACATCCTCAAACAGATGCGCAGGGCCATTGTGGTGGGCGAGCGGACTGGGGGGGGTGCCCTGGACCTCCAGAAGCTAAGGATAGGCCAGTCCGACTTCTTCCTCACTGTGCCTGTGTCCAGGTCTCTAGGGCCCTTGGGAGGGGGCAGCCAGACCTGGGAGGGCAGCGGGGTGCTGCCCTGTGTGGGGACACCAGCGGAGCAAGCCCTCGAGAAAGCCCTGGCCATCCTCACTTTGCGCCGGGCCCTGCCTGGAGTGGTGCGGCGCCTGCAGGGGGCGCTGCAGGCCTACTACACGCTGGTGGACCGCGTGCCCACCCTGCTGCACCACCTGGCCAACATGGACTTCTCTGCGGTGGTCTCCGAGGAGGACCTGGTCGCGAAGCTCAACGCAGGTCTGCAGACTGCGTCTGAAGACCCCAGGCTCCTGGTGCGGGCAGTCAGGCCCAAGGAAACCTCTTCTGGGCCCGAGGTTGGAGAGGACGACCCTCCGGAGGTGGTCCCCACGGTGCCCGACAATGAGGCTGCCCGGCGAGCCCTAGTGGGCGCTATGTTCCAGGTGTCCGTGCTGCCCGGCAACGTGGGCTACCTCCGCTTTGACAGCTTTGCCAATGCCTCGGTGCTGGAGTCGTTGAGCCCCTACATCGTGCATCAGGTGTGGGGGCCTCTG(0 1)000100010011120000?01?01200210000?0100020??4?00?0002?010100000020000000000??010?010000100011600022002000202?????0001002000021?????211010000010100000000000001000000000000001000000000000000(0 1)000000000?00111

Temnocyon_sp ??????????????????????????????????????????????????????????????????????????????????????????????????????????????????????????????????????????????????????????????????????????????????????????????????????????????????????????????????????????????????????????????????????????????????????????????????????????????????????????????????????????????????????????????????????????????????????????????????????????????????????????????????????????????????????????????????????????????????????????????????????????????????????????????????????????????????????????????????????????????????????????????????????????????????????????????????????????????????????????????????????????????????????????????????????????????????????????????????????????????????????????????????????????????????????????????????????????????????????????????????????????????????????????????????????????????????????????????????????????????????????????????????????????????????????????????????????????????????????????????????????????????????????????????????????????????????????????????????????????????????????????????????????????????????????????????????????????????????????????????????????????????????????????????????????????????????????????????????????????????????????????????????????????????????????????????????????????????????????????????????????????????????????????????????????????????????????????????????????????????????????????????????????????????????????????????????????????????????????????????????????????????????????????????????????????????????????????????????????????????????????????????????????????????????????????????????????????????????????????????????????????????????????????????????????????????????????????????????????????????????????????????????????????????????????????????????????????????????????????????????????????????????????????????????????????????????????????????????????????????????????????????????????????????????????????????????????????????????????????????????????????????????????????????????????????????????????????????????????????????????????????????????????????????????????????????????????????????????????????????????????????????????????????????????????????????????????????????????????????????????????????????????????????????????????????????????????????????????????????????????????????????????????????????????????????????????????????????????????????????????????????????????????????????????????????????????????????????????????????????????????????????????????????????????????????????????????????????????????????????????????????????????????????????????????????????????????????????????????????????????????????????????????????????????????????????????????????????????????????????????????????????????????????????????????????????????????????????????????????????????????????????????????????????????????????????????????????????????????????????????????????????????????????????????????????????????????????????????????????????????????????????????????????????????????????????????????????????????????????????????????????????????????????????????????????????????????????????????????????????????????????????????????????????????????????????????????????????????????????????????????????????????????????????????????????????????????????????????????????????????????????????????????????????????????????????????????????????????????????????????????????????????????????????????????????????????????????????????????????????????????????????????????????????????????????????????????????????????????????????????????????????????????????????????????????????????????????????????????????????????????????????????????????????????????????????????????????????????????????????????????????????????????????????????????????????????????????????????????????????????????????????????????????????????????????????????????????????????????????????????????????????????????????????????????????????????????????????????????????????????????????????????????????????????????????????????????????????????????????????????????????????????????????????????????????????????????????????????????????????????????????????????????????????????????????????????????????????????????????????????????????????????????????????????????????????????????????????????????????????????????????????????????????????????????????????????????????????????????????????????????????????????????????????????????????????????????????????????????????????????????????????????????????????????????????????????????????????????????????????????????????????????????????????????????????????????????????????????????????????????????????????????????????????????????????????????????????????????????????????????????????????????????????????????????????????????????????????????????????????????????????????????????????????????????????????????????????????????????????????????????????????????????????????????????????????????????????????????????????????????????????????????????????????????????????????????????????????????????????????????????????????????????????????????????????????????????????????????????????????????????????????????????????????????????????????????????????????????????????????????????????????????????????????????????????????????????????????????????????????????????????????????????????????????????????????????????????????????????????????????????????????????????????????????????????????????????????????????????????????????????????????????????????????????????????????????????????????????????????????????????????????????????????????????????????????????????????????????????????????????????????????????????????????????????????????????002?00001000??0?000?0?10?000?00000000????000?0302010?????30?00????00100??????010??001000000007?000200100100002?1100?00320201?1??11?0?1??????????????????????????????????????????????????????????????????????

Thalassoleon_sp ??????????????????????????????????????????????????????????????????????????????????????????????????????????????????????????????????????????????????????????????????????????????????????????????????????????????????????????????????????????????????????????????????????????????????????????????????????????????????????????????????????????????????????????????????????????????????????????????????????????????????????????????????????????????????????????????????????????????????????????????????????????????????????????????????????????????????????????????????????????????????????????????????????????????????????????????????????????????????????????????????????????????????????????????????????????????????????????????????????????????????????????????????????????????????????????????????????????????????????????????????????????????????????????????????????????????????????????????????????????????????????????????????????????????????????????????????????????????????????????????????????????????????????????????????????????????????????????????????????????????????????????????????????????????????????????????????????????????????????????????????????????????????????????????????????????????????????????????????????????????????????????????????????????????????????????????????????????????????????????????????????????????????????????????????????????????????????????????????????????????????????????????????????????????????????????????????????????????????????????????????????????????????????????????????????????????????????????????????????????????????????????????????????????????????????????????????????????????????????????????????????????????????????????????????????????????????????????????????????????????????????????????????????????????????????????????????????????????????????????????????????????????????????????????????????????????????????????????????????????????????????????????????????????????????????????????????????????????????????????????????????????????????????????????????????????????????????????????????????????????????????????????????????????????????????????????????????????????????????????????????????????????????????????????????????????????????????????????????????????????????????????????????????????????????????????????????????????????????????????????????????????????????????????????????????????????????????????????????????????????????????????????????????????????????????????????????????????????????????????????????????????????????????????????????????????????????????????????????????????????????????????????????????????????????????????????????????????????????????????????????????????????????????????????????????????????????????????????????????????????????????????????????????????????????????????????????????????????????????????????????????????????????????????????????????????????????????????????????????????????????????????????????????????????????????????????????????????????????????????????????????????????????????????????????????????????????????????????????????????????????????????????????????????????????????????????????????????????????????????????????????????????????????????????????????????????????????????????????????????????????????????????????????????????????????????????????????????????????????????????????????????????????????????????????????????????????????????????????????????????????????????????????????????????????????????????????????????????????????????????????????????????????????????????????????????????????????????????????????????????????????????????????????????????????????????????????????????????????????????????????????????????????????????????????????????????????????????????????????????????????????????????????????????????????????????????????????????????????????????????????????????????????????????????????????????????????????????????????????????????????????????????????????????????????????????????????????????????????????????????????????????????????????????????????????????????????????????????????????????????????????????????????????????????????????????????????????????????????????????????????????????????????????????????????????????????????????????????????????????????????????????????????????????????????????????????????????????????????????????????????????????????????????????????????????????????????????????????????????????????????????????????????????????????????????????????????????????????????????????????????????????????????????????????????????????????????????????????????????????????????????????????????????????????????????????????????????????????????????????????????????????????????????????????????????????????????????????????????????????????????????????????????????????????????????????????????????????????????????????????????????????????????????????????????????????????????????????????????????????????????????????????????????????????????????????????????????????????????????????????????????????????????????????????????????????????????????????????????????????????????????????????????????????????????????????????????????????????????????????????????????????????????????????????????????????????????????????????????????????????????????????????????????????????????????????????????????????????????????????????????????????????????????????????????????????????????????????????????????????????????????????????????????????????????????????????????????????????????????????????????????????????????????????????????????????????????????????????????????????????????????????????????????????????????????????????????????????????????????????????????????????????????????????????????????????????????0021100?02110?3032012?10002??00010110????110?230?1002??0201?10???1100100?1???0?13010?000?00015023120?21201100210110001032?1??2?????2????01????0?101111012?022?1?1?0???1101?1???10????(0 1)0???1????0??????????01

Ursus_arctos TGGTGCCCCCCACGGAAGGCCCTGTCGCCTCCACCACCGTGTATGTGGAGGACACCCCAGAGCCGCCCCTCCATGACTTCTACTGCAGCAAGCTTCTGGACCTGGTTTTCCTGCTAGATGGCTCCTCCAAGCTGTCCGAGGACGAGTTCCAAGTGCTGAAGGTCTTCGTGGTCGGCATGATGGAGCGTCTGCATATCTCCCAGAAGCGGATCCGCGTGGCCGTGGTGGAGTACCACGATGGCTCCCACGCCTACCTTGAGCTCAAGGACCGGAAGCGACCGTCGGAGCTGCGGCGCATCGCCAGCCAGGTGAAGTACGTGGGCAGCGAGGTGGCCTCCACCAGCGAGGTCTTGAAGTACACGCTGTTCCAGATCTTTGGCAAGATCGACCGCCCCGAAGCGTCCCGCATCGCCCTGCTCCTGATGGCCAGCCAGGAGCCCCCGAGGCTGGCCCGGAATTTGATCCGCTACGTGCAAGGCCTGAAGAAGAAGAAAGTCATTGTGATCCCCGTGGGCATTGGGCCCCACGCCAACCTCAAGCAGATCCGCAACATCGAGAAGCAGGCACCCGAGAACAAGGCCTTCGTGCTCAGTGGTGTGGACGAGCTGGAGCAGCGAAGGGACGAGATTATCAACTACCTCTGTGACCTTGCCCCTGAAGCACCTGCCCCTACCCAGCACCCCCCTATGGTCCCGGTCACTGTGGGTCCGGAGCTCTTGGGGGTTCCATCATCAGGACCCAAAAGGAACTCCATGGTTCTGGATGTGGTGTTTGTCCTGGAAGGGTCGGACAAAATTGGCGAGGCCAACTTTAACAAGAGCAGGGAGTTCATGGAAGAGGTGATTCAGCGGATGGACGTGGGCCAGGACAGCATCCACGTCACGGTGCTGCAGTACTCGTACACGGTGGCCGTGGAGTACACCTTCAGTGAGGCCCAGTCCAAGGGGGAGGTCCTGCAGCACGTGCGGGAGATCCGATACCGGGGCGGCAACAGGACCAACACCGGGCTGGCCCTGCAGTACCTGTCTGAACACAGCTTCTCTGTCAGCCAGGGGGACCGGGAACAGGTCCCTAACCTGGTCTACATGGTCACAGGAAACCCTGCCTCTGATGAGATCAAGCGGATGCCTGGAGACATCCAGGTTGTGCCCATTGGGGTGGGTCCTCACACCAATGTGCAGGAGCTGGAGCTAAAGACAGAATGAATGTAGAAAAGGCTGAATTCTGTAATAAAAGCAAACAGCTTGGCTCAGCAAGGAGCCAACAGAGCAGATGGGCTGGAAGTAAGGAAACATGTAATGATAGGCAGACTCCCAGCACAGAGAAAAAGGTACTTCTGAATGCTGATCCCCTGCATGGGAGAAAAGAACCGAGGAAGCAGAAACCTGCATGCTCTGACAGTCCTAGAGATTCCCAAGATGTTCCTTGGATAACGCTGAATAGTAGCGTACAGAAAGTTAATGAGTGGTTTTCCAGAAGTGATGGAATGTTACCTTCT---GATGACTCAYATGACGGGGGCTCTGACTCGAATACTGGAGTAGCTGGTGCGGTAGAAGTTCCAAATGAAGTGGACGGATATTCTGGTTCTTCTGAGAAAGTAGATTTAATGGCCAGTGATCCTCAGGTTGCTTTGATACGTGGAAGTGAAAGAGTCCACCCCAAGTCAGTAGAGAGTAATATCGAAGATAAAATATTTGGGAAAACCTACCGGAGGAGGGCGAGCCTCCCT------AGCCACACGAATGAAGACCTAATTATAGGATTTCGTGCTATAGAACCTCAGACAACGCGAGCCCATCCCCTCACAAATAAAGCAAAGTGTAAAAGGAGAACTACATCAGGCCTTCTTCCTGAGGATTTTATCAAGAAAGTAGATTTGGCCGTTGTTCCAAAGACTCCTGAAAAGCTAGTTGAGGGAACCAACCAAATCGCACGAAATGGTCACGTGATGAATATTACAAATAACGGTCCTGAGAATGAAGCAAAAGGTGATTATGTTCAGAACGAGAAAAATGCTAACCCAACAGAATCATTGGAAAAAGAATCTGCTTTTAGAAGCAAAGCTGAACCGATAAGCAGCAGTATAAGCAATATGGAACTGGAATTAAATAGCTCCAGTTCGAAAGCCCCTAAGAAGAACAGGCTGAGGAGGAAGTCCTCCACCAGGCACGCTTGTGCACTTGAATTCGTAGTCAGTAGAAATCCAAGCCCGCCTGATCATGGCGAACTACAGAACCATCAGAATTTCTCTGCTGGAAACAATGAGAACAGCGCTGAGGCCCACATAGGAATAAATGGAGAAGCCAACCTGGATTTCCTCAATATTCCTTTGACAATTCCTGAAATGACTCTACCTTACACAACATTCACAACTCCCCAGGTGAAAGATTTCTCCTTGTGGGAAAAAACAGGCTTGAAGGATTTCTTGAAGACAACAAAGCAATCATTTGATTTAAGTGTAAAGGCTCAGTATAAGAAAAACAAAGACAAGCATATCATCCCAATTCCTTTTTATACAAAAGATTTCCAGGTATTGAGTACCCCAAATGATATTTTCATTCCAGCCATGGGCAATATTACCTATGACTTTTCCTTTAAGTCAGGCATCATCACACTGAATACCATTGTTGGACTATATAACCAGTCAGATATTGTTGCTCATTTCCTAACTTCCTCTTCTTCTGCCACCGATGCACTGCAGTACAAATTAGAGGGCACCTCAAGTTTGACAAGGAAAAGAGACTTGAAGCTAGCCACAGCTTTGTCTCTGAGTAATAAATTCGTGGAAGGCAATCATGACAGTACTATTAGTTTGACCAAGAAAAACATGGAGGCATCAGTGACAACATCTGCAAAAGTCCAAATTCCCATTTTGAGAATGAATTTCAAGCAAGAACTTAATGGAAATACCAAGTCGAAGCCTACTGTCTCTGCATCCATTGAATTAACGTATGATCTCAATTCCCCTGAACGGTACTCTACTGCTACAGGGACAGTCAGCCACAAATTCAACTTGGAGAGCCTCACCTCTTACTTTTCCATTGAATCATCTACCAAAGGAGATATCAAGGGTTCAGTCTTTTCACGGGAATATTTAGGAACTATTGCCAGTGAGGCCAGCACTTACTTGAATTCCAAGAGTACTCGGTCTTCAGTGAAGCTGCAAGGGGCTTCCAAAGTTGATGATATTTGGGAACCATGACAGCCCAAGACCTTGATGACTACCTGAATGGCCCCTTTACCGTCGTGGTGAAGGAGTCTTGCGACGGAATGGGAGATGTGAGCGAGAAGCACGGGAGCGGGCCCGCAGTTCCAGAAAAGGCAGTTCGGTTTTCATTCACGGTCATGAAAATTACCATAGCACGTGGCTCAGAAAATGTGAAGGTGTTCGAAGAAGTCAAACCTAACTCTGAACTGTGTTGTAAGCCTCTGTGTCTCATGCTGGCAGATGAGTCTGACCATGAGACCCTGACGGCCATCCTGAGCCCTCTCATTGCTGAGAGGGAGGCCATGAAGAGCAGCCAATTAATGCTTGAGATGGGAGGCATCCTTCGGACTTTCAAGTTCATCTTCAGGGGCACCGGCTATGATGAGAAACTCGTCCGGGAAGTCGAAGGCCTCGAGGCTTCTGGCTCAGTATACATTTGTACCCTTTGTGATGCCACCCGCTTGGAAGCCTCTCAAAATCTTGTCTTCCACTCCATCACCAGAAGCCACTCTGAGAACCTGGAGCGCTATGAGGTCTGGCGTTCCAACCCGTACCACGAGTCTGTGGACGAACTGCGGGATCGGGTGAAGGGGGTCTCATCGAAACCTTTCATCGAGACAGTCCCTTCCATAGATGCACTCCACTGCGACATTGGCAATGCGGCCGAGTTCTACAAGATTTTCCAGCTAGAGATAGGGGAGGTGTATAAGAATCCCAATGCCTCCAAAGAGGAAAAGAAAAGATGGCAGGCTACGTTGGACAAGCATCTCAGGAAGAAGATGAACCTCAAGCCGATCATGAGGATGAATGGCAACTTTGCCAGGAAGCTCATGACCAAAGAGACGGTTGAAGCAGTGTGTGAATTAATTCCCTCTGAGGAGAGGCACGAGGCTCTGAGAGAGCTGATGGACCTTTACCTGAAGATGAAGCCTGTATGGCGATCGTCGTGTCCTGCGAAAGAGTGCCCAGAATCCCTCTGCCAGTATAGCTTCAATTCACAGCGTTTTGCTGAGCTCCTCTCTACCAAGTTCAAGTATAGATACGAGGGCAAAATCACCAATTATTTTCACAAAACCCTGGCACA????GCCCATGTGCTGACCACTGGGGTGCAGAGCTCCTTGAACGACCCTCGCCTTGTCATCTCATATGAGCCCAGCACCCTCGAGGCTCCCCGGCAAGCCCCAGCACTCACCAACCTCACACAAGAGGAACTGCTTGCCCGGTTGCAGAAGGGCATCCGCCACGAGGTTCTGGAGGGCAATGTGGGCTACCTGCGTGTGGACGACATCCCAGGCCAGGAGGTGGTGAGCAAGCTGGGGGGCTTCCTGGTGGCCAGCGTCTGGAGGAAGCTCATGGGCACCTCTGCCTTGGTACTGGACCTCCGGCACTGCACTGGGGGCCGCATTTCCGGCATCCCCTACGTCATCTCTTACCTGCACCCCGGGAACACGGTCCTGCACGTGGATACCATCTACGACCGCCCCTCCAACACGACCACTGAGATCTGGACCCTGCCCCAGGTCCAAGGAGAAAGGTACAGTGCCGACAAAGATGTGGTGGTCCTCACCAGCGGCCACACGGGGGGCGTGGCTGAGGACATCACCTACATCCTCAAACAGATGCGCAGGGCCATCGTGGTGGGTGAGCGGACTGTGGGGGGTGCCCTGGACCTCCAGAAACTGAGGATAGGCCAGTCCGACTTCTTCCTCACCGTGCCCGTGTCCCGGTCCCTAGGGCCCCTGGGAGGGGGCAGCCAGACATGGGAGGGCAGCGGGGTGCTGCCCTGTGTGGGGACACCAGCCGAGCAGGCCCTCGAGAAAGCCCTGGCCATCCTCACTCTGCGCCGGGCCCTGCCAGGGATAGTGCGGCGCCTGCAGGAGGCCCTGCAGGCCTACTACACGCTGGTGGACCGTGTGCCCACCCTGCTGCACCACCTGGCCAACATGGACTTCTCTGCGGTGGTCTCTCAGGAGGACCTGGTCACGAAGCTCAACGCTGGCCTACAGACTGCGTCTGAGGACCCCAGGCTCCTGGTGCGGGCCGTGAGGCCCAAGGAAAGCTCTGCTGAGCCCGAGATCGGAGACGACGACCTTCCGGAGGTGGTCCCCACAGTGCCCGGGGATGAGGCTGCCCGGCGGGCCCTGGTGGACTCTATGTTCCAGGTGTCCGTGCTGCCAGGCAACGTGGGCTACCTCCGCTTTGACAGCTGTGCCGACGCCTCGGTGCTGGAGGTGCTGAGCCCGCACATCATGCGCCAGGTGTGGGAGCCCCTG000001(0 1)01100110?02030010123?2010000000?0200000102000200010010000200000000002001020101000000003200010121201?3011110000000110223?00001??010002112000001010010000000000000000000000?1000000000101000100201?010(0 1)

Zalophus_californianus ???????????????????????????????????????????????????????????????????????????????????????????????????????????????????????????????????????????????????????????????????????????????????????????????????????????????????????????????????????????????????????????????????????????????????????????????????????????????????????????????????????????????????????????????????????????????????????????????????????????????????????????????????????????????????????????????????????????????????????????????????????????????????????????????????????????????????????????????????????????????????????????????????????????????????????????????????????????????????????????????????????????????????????????????????????????????????????????????????????????????????????????????????????????????????????????????????????????????????????????????????????????????????????????????????????????????????????????????????????????????????????????????????????????????????????????????????????????????????????????????????????????????????????????????????????????????????????????????????????????????????????????????????????????????????????????????????????????????????????????????????????????????????????????????????????????????????????????????????????????????????????????????????????????????????????????????????????????????????????????????????????????????????????????????????????????????????????????????????????????????????????????????????????????????????????????????????????????????????????????????????????????????????????????????????????????????????????????????????????????????????????????????????????????????????????????????????????????????????????????????????????????????????????????????????????????????????????????????????????????????????????????????????????????????????????????????????????????????????????????????????????????????????????????????????????????????????????????????????????????????????????????????????????????????????????????????????????????????????????????????????????????????????????????????????????????????????????????????????????????????????????????????????????????????????????????????????????????????????????????????????????????????????????????????????????????????????????????????????????????????????????????????????????????????????????????????????????????????????????????????????????????????????????????????????????????????????????????????????????????????????????????????????????????????????????????????????????????????????????????????????????????????????????????????????????????????????????????????????????????????????????????????????????????????????????????????????????????????????????????????????????????????????????????????????????????????????????????????????????????????????????????????????????????????????????????????????????????????????????????????????????????????????????????????????????????????????????????????????????????????????????????????????????????????????????????????????????????????????????????????????????????????????????????????????????????????????????????????????????????????????????????????????????????????????????????????????????????????????????????????????????????????????????????????????????????????????????????????????????????????????????????????????????????????????????????????????????????????????????????????????CATGAGAGCCCAAGACCTTGATGACTACCTGAATGGCCCCTTCACCGTCGTGGTGAAGGAGTCTTGTGACGGAATGGGAGATGTGAGCGAGAAGCACGGGAGYGGGCCAGCCGTTCCAGAAAAGGCAGTTCGGTTTTCGTTCAC?GTCATGAAAATTACTATAGCCCATGGCTCAGAAAATGTGAAGGTGTTTGAAGAAGTCAAACCCAACTCTGAACTGTGTTGTAAGCCCCTGTGTCTCATGCTGGCAGATGAGTCTGACCACGAGACCCTGACGGCCATCCTGAGTCCTCTCATTGCCGAGAGGGAGGCCATGAAGAGCAGCCAATTAATGCTTGAGATGGGAGGCATCCTTCGGACTTTCAAGTTCATCTTCAGGGGCACCGGATATGATGAGAAACTCATCCGGGAAGTCGAAGGCCTCGAGGCTTCTGGCTCAGTCTACATTTGTACCCTTTGTGACACCACCCGCCTAGAAGCCTCTCAAAATCTTGTCTTCCACTCCATCACCAGAAGCCACTCTGAGAACCTGGAGCGCTATGAGGTCTGGCGTTCCAACCCATACCACGAGTCAGTGGAAGAACTGCGGGATCGGGTGAAAGGGGTCTCATCGAAACCTTTCATCGAGACTGTCCCTTCCATAGATGCACTCCACTGTGACATTGGCAATGCAGCTGAGTTCTACAAGATTTTCCAGCTAGAGATAGGGGAGGTGTATAGGAATCCCAATGCTTCCAAAGAGGAAAGGAAAAGATGGCAGGCTACATTGGACAAGCATCTCCGGAAGAAGATGAACCTGAAACCCATCATGAGGATGAATGGCAACTTTGCCAGGAAGCTCATGACCAAAGAGACAGTTGAAGCAGTTTGTGAATTAATTCCCTCTGAGGAGAGGCATGAAGCTCTGAGGGAGCTGATGGACCTTTACCTGAAGATGAAGCCTGTATGGCGATCAACGTGTCCCGCAAAAGAGTGCCCAGAATCCCTCTGCCAGTATAGCTTCAATTCACAGCGTTTTGCTGAGCTCCTTTCTACCAAGTTCAAGTATAGATATGAGGGCAAAATCACCAATTATTTTCACAAAACCCTGGCACA????GCCCATGTGCTGACCACCGGGGTGCAGAGCTCCTTGAACGACCCTCGCCTGGTCATCTCATATGAGCCCAGCACTCTTGAGGCTCCCCGGCAAGCCCCAGCACTCACCAACCTCACACAAGAGGAACAGCTTGCCCGGTTGCAGAAGGGCATCCGCCATGAGGTTCTGGAGGGCAATGTGGGCTACCTGCGTATGGACGACATCCCAGGCCAGGAGGTGGTGAGCAAGCTGGGGGGCTTCCTGGTGGCCAGCGTCTGGAGGAAGCTCATGGGCACCTCTGCCTTGGTGCTAGACCTCCGGCACTGCACTGGGGGCCACATTTCCGGCATCCCCTACGTCATCTCCTACCTACACCCAGGGAACACGGTCCTGCACGTAGATACCATCTACAACCGCCCCTCCAATACAACCACTGAGATCTGGACCCTGCCCCAGGTCCTAGGAGAAAGGTACAGTGCCGACAAGGATGTGGTGGTCCTCACCAGCGGCCACACGGGGGGCGTGGCTGAGGACATCACTTACATCCTCAAACAGATGCGCAGGGCCATCGTGGTGGGTGAGCGGACTGTGGGGGGTGCCCTGGACCTCCAGAAGCTGCGGATAGGCCAGTCCGACTTCTTCCTCACTGTGCCCGTGTCCAGGTCCCTAGGGCCCCTGGGAGGGGGCAGCCAGACATGGGAGGGCAGTGGAGTGCTGCCCTGTGTGGGGACACCAGCAGAGCAGGCGCTCGAGAAAGCCCTGGCCATCCTCACTCTGCGCCGGGCCCTGCCAGGAGTTGTGCAGCGCCTGCAGGAGGCACTGCAGGCCTACTACACGCTGGTGGACCGCGTGCCCACCCTGCTGCACCACCTGGCCAACATGGACTTCTCTACGGTGGTCTCTGAGGAGGACCTGGTCACGAAGCTCAACGCTGGTCTACAGACTGCGTCTGAGGACCCCAGGCTCCTGGTGCGGGCCGTCAGGCCCAAGGAAACCCTTTCTGGGCCTGAGGTTGGAGACGATGACCCTCCGGAGGTGGTCCCCACAGTGGCCGAGGATGAGGCTGTCCGGCGGGCCCTGGTGGACTCTATGTTCCAGGTGTCCGTGCTGCCGGGCAACGTGGGCTACCTCCGCTTTGACAGCTTTGCCGACGCCTCCGTGCTGGAGGTGCTGAGCCCATACATCGTGCGCCAGGTGTGGGAGCCCCTG01?110?000100?303??02??00021300010000?0??11?013001?0?00?20111010101001001002101?3000110000?015033120??1201(1 2)2?????10101?32?110??????2100311001100101211112102111111011110?101011101211101001110011100000?0000

Zodiolestes_sp ??????????????????????????????????????????????????????????????????????????????????????????????????????????????????????????????????????????????????????????????????????????????????????????????????????????????????????????????????????????????????????????????????????????????????????????????????????????????????????????????????????????????????????????????????????????????????????????????????????????????????????????????????????????????????????????????????????????????????????????????????????????????????????????????????????????????????????????????????????????????????????????????????????????????????????????????????????????????????????????????????????????????????????????????????????????????????????????????????????????????????????????????????????????????????????????????????????????????????????????????????????????????????????????????????????????????????????????????????????????????????????????????????????????????????????????????????????????????????????????????????????????????????????????????????????????????????????????????????????????????????????????????????????????????????????????????????????????????????????????????????????????????????????????????????????????????????????????????????????????????????????????????????????????????????????????????????????????????????????????????????????????????????????????????????????????????????????????????????????????????????????????????????????????????????????????????????????????????????????????????????????????????????????????????????????????????????????????????????????????????????????????????????????????????????????????????????????????????????????????????????????????????????????????????????????????????????????????????????????????????????????????????????????????????????????????????????????????????????????????????????????????????????????????????????????????????????????????????????????????????????????????????????????????????????????????????????????????????????????????????????????????????????????????????????????????????????????????????????????????????????????????????????????????????????????????????????????????????????????????????????????????????????????????????????????????????????????????????????????????????????????????????????????????????????????????????????????????????????????????????????????????????????????????????????????????????????????????????????????????????????????????????????????????????????????????????????????????????????????????????????????????????????????????????????????????????????????????????????????????????????????????????????????????????????????????????????????????????????????????????????????????????????????????????????????????????????????????????????????????????????????????????????????????????????????????????????????????????????????????????????????????????????????????????????????????????????????????????????????????????????????????????????????????????????????????????????????????????????????????????????????????????????????????????????????????????????????????????????????????????????????????????????????????????????????????????????????????????????????????????????????????????????????????????????????????????????????????????????????????????????????????????????????????????????????????????????????????????????????????????????????????????????????????????????????????????????????????????????????????????????????????????????????????????????????????????????????????????????????????????????????????????????????????????????????????????????????????????????????????????????????????????????????????????????????????????????????????????????????????????????????????????????????????????????????????????????????????????????????????????????????????????????????????????????????????????????????????????????????????????????????????????????????????????????????????????????????????????????????????????????????????????????????????????????????????????????????????????????????????????????????????????????????????????????????????????????????????????????????????????????????????????????????????????????????????????????????????????????????????????????????????????????????????????????????????????????????????????????????????????????????????????????????????????????????????????????????????????????????????????????????????????????????????????????????????????????????????????????????????????????????????????????????????????????????????????????????????????????????????????????????????????????????????????????????????????????????????????????????????????????????????????????????????????????????????????????????????????????????????????????????????????????????????????????????????????????????????????????????????????????????????????????????????????????????????????????????????????????????????????????????????????????????????????????????????????????????????????????????????????????????????????????????????????????????????????????????????????????????????????????????????????????????????????????????????????????????????????????????????????????????????????????????????????????????????????????????????????????????????????????????????????????????????????????????????????????????????????????????????????????????????????????????????????????????????????????????????????????????????????????????????????????????????????????????????????????????????????????????????????????????????????????????????????????????????????????????????????????????????????????????????????????????????????????????????????????????????????????????????????????????????????????????????????????????????????????????????????????????????????????????????????????????????????????????????????????000?0?000000??10000000101200?1001000?????002?100?0000???010?00???00000000????010?000000000010000002002?0000100101?000032001011?111?2110?00?00001100000100?00?1???0????0???001010?0000???001?1000000?????????

;end;

begin mrbayes;

charset VWF = 1-1191;

charset BRCA1 = 1192-2240;

charset APOB = 2240-3203;

charset RAG1 = 3204-4302;

charset IRBP = 4303-5490;

charset Morphology = 5491-5694;

partition favored = 6: VWF, BRCA1, APOB, RAG1, IRBP, Morphology;

set partition = favored;

lset applyto=(1,2,3) nst=6 rates=gamma;

lset applyto=(4,5) nst=6 rates=invgamma;

prset clockratepr = lognorm (-7, 0.6);

prset clockvarpr = igr;

prset igrvarpr = exp (10);

outgroup canis_lupus;

taxset fossils = acrophoca_longirostris allocyon_loganensis allodesmus_sp amphicticeps_shackelfordi amphictis_ambiguus arctodus_simus brachypsalis_sp broiliana_nobilis desmatophoca_oregonensis devinophoca_sp Enaliarctos_barnesi Enaliarctos_emlongi Enaliarctos_mealsi Enaliarctos_mitchelli Enaliarctos_tedfordi Hemicyon_sp Hesperocyon_gregarius Imagotaria_downsi Kolponomos_sp Megalictis_sp Mustelavus_priscus Neotherium_mirum Oligobunis_sp Paragale_hurzeleri Phoberogale_sp Pinnarctidion_rayi Piscophoca_pacifica Plesiogale_angustifrans Pontolis_magnus Potamotherium_vallentoni Promartes_sp Promephitis_sp Proneotherium_repenningi Prototaria_sp Pseudobassaris_riggsi Pteronarctos_goedertae Puijila_darwini Semantor_macrurus Simocyon_sp Sthenictis_sp Stromeriella_franconica Temnocyon_sp Thalassoleon_sp Zodiolestes_sp;

calibrate acrophoca_longirostris=unif(5.93, 7.10) allocyon_loganensis=unif(29.75, 30.6) allodesmus_sp=unif(9.1, 16.0) amphicticeps_shackelfordi=unif(23, 31.5) Amphictis_ambiguus=unif(13.65, 25.60) Arctodus_simus=unif(0.01, 1.8) Brachypsalis_sp=unif(11,18.9) Broiliana_nobilis=unif(13.65, 23.03) Desmatophoca_oregonensis=unif(16.00, 20.43) Devinophoca_sp=unif(11.61, 13.65) Enaliarctos_barnesi=unif(26.4, 28.1) Enaliarctos_emlongi=unif(19.1, 20.2) Enaliarctos_mealsi=unif(21.5, 24) Enaliarctos_mitchelli=unif(19.1, 24) Enaliarctos_tedfordi=unif(27.4, 28.1) Hemicyon_sp=unif(7.24, 16.9) Hesperocyon_gregarius=unif(31, 41.4) Imagotaria_downsi=unif(7.3, 11.61) Kolponomos_sp=unif(16, 23.03) Megalictis_sp=unif(18.5, 22.7) Mustelavus_priscus=unif(24.8, 34.5) Neotherium_mirum=unif(14.5, 16.4) Oligobunis_sp=unif(15.97, 25.9) Paragale_hurzeleri=unif(20.43, 23.03) Phoberogale_sp=unif(20.5, 34) Pinnarctidion_rayi=unif(17.3, 24) Piscophoca_pacifica=unif(5.93, 7.10) Plesiogale_angustifrans=unif(15.97, 20.43) Pontolis_magnus=unif(6.5, 8.7) Potamotherium_vallentoni=unif(20.0, 24.6) Promartes_sp=unif(17.5, 24) Promephitis_sp=unif(3.2, 11.1) Proneotherium_repenningi=unif(16.6, 17.3) Prototaria_sp=unif(15.5, 16) Pseudobassaris_riggsi=unif(27.6, 30.3) Pteronarctos_goedertae=unif(16.6, 20.7) Puijila_darwini=unif(21, 24) Semantor_macrurus=unif(2.58, 5.33) Sthenictis_sp=unif(4.9, 11.6) Stromeriella_franconica=unif(15.97, 20.43) Temnocyon_sp=unif(20.4, 30.8) Thalassoleon_sp=unif(4.9, 10.3) Zodiolestes_sp=unif(16.3, 30.8);

prset nodeagepr=calibrated;

prset brlenspr = clock:fossilization;

prset samplestrat=fossiltip;

prset sampleprob = 0.085;

prset speciationpr = exp(10);

prset extinctionpr = beta(1,1);

prset fossilizationpr = beta(1,1);

prset treeagepr = uniform(43,63);

delete semantor_macrurus;

unlink statefreq=(all) revmat=(all) shape=(all) pinvar=(all);

prset applyto=(all) ratepr=variable;

mcmcp nrun = 2 nchain = 4 ngen = 5000000 samplefr = 1000;

mcmcp filename = puijilafbdtest4.tre printfr = 1000 diagnfr = 5000;

end;
